# Supplementary material for: UPF1 helicase promotes TSN-mediated miRNA decay
Source: PubMed Central journal article supplement — Genes Dev. 2017 Jul 15;31(14):1483–93. doi: 10.1101/gad.303537.117 (PMC5588929; doi:10.1101/gad.303537.117), 2017-07-15
Supplement: supp_gad.303537.117_Supplemental_Tables.pdf [file supp_gad.303537.117_Supplemental_Tables.pdf]

**Supplemental Table S1.** Top five proteins identified by mass spectrometry to coimmunoprecipitate with FLAG-TSN in HEK293T cells

| # | Identified Proteins                                              | Accession # (gi) | MW (kDa)   | # of Peptides                          |                     |              |
|---|------------------------------------------------------------------|------------------|------------|----------------------------------------|---------------------|--------------|
|   |                                                                  |                  |            | $\alpha$ -FLAG IP of Cells Expressing: |                     |              |
|   |                                                                  |                  |            | FLAG + MYC                             | FLAG-TSN + MYC-UPF1 |              |
|   |                                                                  |                  |            | IP - RNase I                           | IP - RNase I        | IP + RNase I |
|   | <b>Staphylococcal nuclease domain-containing protein 1 (TSN)</b> | <b>77404397</b>  | <b>102</b> | <b>39</b>                              | <b>2849</b>         | <b>2510</b>  |
| 1 | Cluster of tubulin beta chain isoform b                          | 29788785 [6]     | 50         | 25                                     | 562                 | 577          |
| 2 | Fatty acid synthase                                              | 41872631         | 273        | 13                                     | 550                 | 485          |
| 3 | Cluster of tubulin alpha-1B chain                                | 57013276 [5]     | 50         | 13                                     | 432                 | 442          |
| 4 | Regulator of nonsense transcripts 1 isoform 2 (UPF1)             | 18375673         | 123        | 17                                     | 514                 | 434          |
| 5 | Heat shock protein HSP 90-beta isoform c                         | 431822408        | 82         | 23                                     | 439                 | 431          |

MW<sub>s</sub>, molecular weight

**Supplemental Table S2.** Top five proteins identified by mass spectrometry to coimmunoprecipitate with MYC-UPF1 in HEK293T cells

| # | Identified Proteins                                         | Accession # (gi) | MW (kDa)     | # of Peptides                         |              |             |
|---|-------------------------------------------------------------|------------------|--------------|---------------------------------------|--------------|-------------|
|   |                                                             |                  |              | $\alpha$ -MYC IP of Cells Expressing: |              |             |
|   |                                                             |                  | FLAG + MYC   | FLAG-TSN + MYC-UPF1                   | IP + RNase I |             |
|   |                                                             |                  | IP - RNase I | IP - RNase I                          | IP + RNase I |             |
|   | <b>Regulator of nonsense transcripts 1 isoform 2 (UPF1)</b> | <b>18375673</b>  | <b>123</b>   | <b>9</b>                              | <b>1477</b>  | <b>1554</b> |
| 1 | Filamin-A isoform 1                                         | 116063573 (+1)   | 280          | 0                                     | 314          | 300         |
| 2 | Cluster of tubulin beta chain isoform b                     | 29788785 [6]     | 50           | 20                                    | 147          | 185         |
| 3 | Fatty acid synthase                                         | 41872631         | 273          | 22                                    | 133          | 162         |
| 4 | Cluster of tubulin alpha-1B chain                           | 57013276 [5]     | 50           | 7                                     | 87           | 117         |
| 5 | Staphylococcal nuclease domain-containing protein 1 (TSN)   | 77404397         | 102          | 6                                     | 92           | 107         |

MW, molecular weight

**Supplemental Table S3** Results of miR-seq of five biological replicates of Ctl siRNA-, TSN siRNA- or UPE1 siRNA-treated T24 human bladder cancer cells

| miRNA                          | baseMean    | TSN siRNA vs Ctl siRNA |             |               |           | UPE1 siRNA vs Ctl siRNA |                                |             |              |              |              |             |              |
|--------------------------------|-------------|------------------------|-------------|---------------|-----------|-------------------------|--------------------------------|-------------|--------------|--------------|--------------|-------------|--------------|
|                                |             | log2FoldChange         | lfcSE       | stat          | pvalue    | log2FoldChange          | lfcSE                          | stat        | pvalue       |              |              |             |              |
| hsa-miR-126-3p                 | 670.634624  | 1.925321797            | 0.083275823 | 23.11981723   | 2.93E-118 | 2.22E-115               | hsa-miR-126-3p                 | 670.634624  | 1.281245476  | 0.085542027  | 14.97766483  | 1.02E-50    | 7.95E-49     |
| hsa-miR-200b-3p                | 3624.572617 | -1.967047119           | 0.091597321 | -21.47494165  | 2.67E-102 | 1.01E-99                | hsa-miR-200b-3p                | 3624.572617 | -1.665516298 | 0.091657711  | -18.17104396 | 8.75E-74    | 1.70E-71     |
| hsa-miR-16-2-3p                | 2359.98358  | -1.682667279           | 0.09438027  | -17.8285915   | 4.24E-71  | 1.07E-68                | hsa-miR-16-2-3p                | 2359.98358  | -2.037922918 | 0.095339404  | -21.37545272 | 2.26E-101   | 8.78E-99     |
| hsa-miR-200a-5p                | 1604.79018  | -2.403486956           | 0.144500798 | -16.63303582  | 4.02E-65  | 7.60E-60                | hsa-miR-200a-5p                | 1604.79018  | -1.695755383 | 0.139933191  | -12.11832141 | 8.45E-34    | 3.86E-32     |
| hsa-miR-339-3p                 | 850.2566236 | 0.870359908            | 0.055422488 | 15.70409293   | 1.42E-55  | 2.15E-53                | hsa-miR-339-3p                 | 850.2566236 | 0.811416829  | 0.056639089  | 14.32609243  | 1.50E-46    | 9.73E-45     |
| hsa-miR-126-5p                 | 852.076426  | 1.512673868            | 0.098921015 | 15.29173415   | 8.68E-53  | 1.10E-50                | hsa-miR-126-5p                 | 852.076426  | 0.822498219  | 0.099087435  | 8.300731788  | 1.03E-16    | 1.96E-15     |
| hsa-miR-378a-3p/378c/378d/378e | 3932.631286 | 1.77612388             | 0.117599213 | 15.1031953    | 1.54E-51  | 1.67E-49                | hsa-miR-378a-3p/378c/378d/378e | 3932.631286 | 1.254618895  | 0.117837584  | 10.64701812  | 1.80E-26    | 6.08E-25     |
| hsa-miR-181a-2-3p              | 6865.50991  | -1.898826362           | 0.131829229 | -14.41128806  | 4.40E-47  | 4.16E-45                | hsa-miR-181a-2-3p              | 6865.50991  | -1.556711542 | 0.131837673  | -11.80778992 | 3.56E-32    | 1.45E-30     |
| hsa-miR-429                    | 513.2557539 | -1.69947875            | 0.119095289 | -14.26990748  | 3.37E-46  | 2.83E-44                | hsa-miR-429                    | 513.2557539 | -1.754375887 | 0.120965324  | -14.50313056 | 1.16E-47    | 8.18E-46     |
| hsa-miR-181b-5p                | 43226.70562 | -1.392782873           | 0.099172432 | -14.04405289  | 8.38E-45  | 6.34E-43                | hsa-miR-181b-5p                | 43226.70562 | -1.155825843 | 0.099179613  | -11.65386527 | 2.19E-31    | 8.52E-30     |
| hsa-miR-200a-3p                | 354.7423838 | -1.604329674           | 0.114729768 | -13.98349974  | 1.97E-44  | 1.35E-42                | hsa-miR-200a-3p                | 354.7423838 | -1.545130658 | 0.116654705  | -13.2453351  | 4.80E-40    | 2.49E-38     |
| hsa-miR-210-3p                 | 5406.426886 | 1.467334578            | 0.115121335 | 12.74598298   | 3.28E-37  | 2.07E-35                | hsa-miR-210-3p                 | 5406.426886 | 1.438364058  | 0.115199358  | 12.4858867   | 8.92E-36    | 4.33E-34     |
| hsa-miR-221-3p                 | 38668.51596 | 0.840765791            | 0.07289282  | 11.5342744    | 8.86E-31  | 5.16E-29                | hsa-miR-221-3p                 | 38668.51596 | 0.29360701   | 0.072939869  | 4.025329544  | 5.69E-05    | 0.000309146  |
| hsa-miR-584-5p                 | 3099.581308 | -0.735742079           | 0.063841131 | -11.5245773   | 9.92E-31  | 5.36E-29                | hsa-miR-584-5p                 | 3099.581308 | -0.031466908 | 0.06354241   | -0.49521112  | 0.620451102 | 0.767660041  |
| hsa-miR-381-3p                 | 28.94911051 | -3.439051529           | 0.301311882 | -11.16269308  | 3.58E-30  | 1.80E-28                | hsa-miR-381-3p                 | 28.94911051 | -2.376604833 | 0.270033998  | -8.801131902 | 1.35E-18    | 3.01E-17     |
| hsa-miR-138-5p                 | 5569.766553 | 1.389416701            | 0.124466968 | 11.16269308   | 6.21E-29  | 2.94E-27                | hsa-miR-138-5p                 | 5569.766553 | 0.658181221  | 0.124680837  | 5.278928466  | 1.30E-07    | 1.07E-06     |
| hsa-miR-26a-5p                 | 252890.1089 | 0.537222106            | 0.048355947 | 11.10974221   | 1.12E-28  | 5.01E-27                | hsa-miR-26a-5p                 | 252890.1089 | 0.494033295  | 0.048360804  | 10.21557239  | 1.69E-24    | 5.05E-23     |
| hsa-miR-181a-3p                | 352.152208  | -1.642973128           | 0.149164837 | -11.01448008  | 3.25E-28  | 1.37E-26                | hsa-miR-181a-3p                | 352.152208  | 0.20209089   | 0.148570811  | 1.360227794  | 0.173756268 | 0.325321976  |
| hsa-miR-152-3p                 | 682.1636048 | 1.055659574            | 0.09618515  | 10.97566493   | 5.00E-28  | 1.99E-26                | hsa-miR-152-3p                 | 682.1636048 | 1.012578495  | 0.096959847  | 10.43940054  | 1.64E-25    | 5.30E-24     |
| hsa-miR-411-5p                 | 29.28672028 | -3.617515378           | 0.333754203 | -10.837686087 | 2.25E-27  | 8.53E-26                | hsa-miR-411-5p                 | 29.28672028 | -2.167356629 | 0.2291342613 | -7.439874019 | 1.01E-17    | 1.48E-12     |
| hsa-miR-205-5p                 | 3502.58479  | 1.854294769            | 0.172656017 | 10.73982131   | 6.62E-27  | 2.39E-25                | hsa-miR-205-5p                 | 3502.58479  | 2.075220286  | 0.172683407  | 12.01748519  | 2.88E-33    | 1.24E-31     |
| hsa-miR-7641                   | 534.6834525 | 1.798888881            | 0.170512089 | 10.54990232   | 5.08E-26  | 1.75E-24                | hsa-miR-7641                   | 534.6834525 | -0.307354883 | 0.175152571  | -1.754783734 | 0.079296307 | 0.17807292   |
| hsa-miR-4454                   | 1263.733943 | -1.094270959           | 0.105022967 | -10.41945505  | 2.02E-25  | 6.65E-24                | hsa-miR-4454                   | 1263.733943 | -2.552744369 | 0.109323396  | -2.335039394 | 1.37E-120   | 1.06E-117    |
| hsa-miR-582-5p                 | 163.5687844 | 1.522425053            | 0.149767653 | 10.16521573   | 2.83E-24  | 8.94E-22                | hsa-miR-582-5p                 | 163.5687844 | 0.432367263  | 0.157694742  | 2.741798854  | 0.006110375 | 0.020464488  |
| hsa-miR-522-3p                 | 57.39013694 | -1.785493567           | 0.180098226 | -9.913998613  | 3.62E-23  | 1.05E-21                | hsa-miR-522-3p                 | 57.39013694 | -1.307465224 | 0.158884835  | -8.228825599 | 1.89E-16    | 3.42E-15     |
| hsa-miR-641                    | 205.1653473 | -1.108921246           | 0.116505725 | -9.518169539  | 1.76E-21  | 4.94E-20                | hsa-miR-641                    | 205.1653473 | -1.209056447 | 0.120666976  | -10.01977911 | 1.25E-23    | 3.59E-22     |
| hsa-miR-29a-3p                 | 31517.04788 | 0.929097449            | 0.097939336 | 9.486458559   | 2.39E-21  | 6.46E-20                | hsa-miR-29a-3p                 | 31517.04788 | 0.769310135  | 0.097962213  | 7.853131445  | 4.06E-15    | 6.43E-14     |
| hsa-miR-301b-3p                | 4472.988587 | 0.918848671            | 0.098789295 | 9.30109552    | 1.39E-20  | 3.63E-19                | hsa-miR-301b-3p                | 4472.988587 | 0.056322117  | 0.099204988  | 0.56773533   | 0.570214698 | 0.720417594  |
| hsa-miR-181a-5p                | 174.7860416 | -1.341863826           | 0.148015997 | -9.06567612   | 1.24E-19  | 3.12E-18                | hsa-miR-181a-5p                | 174.7860416 | -1.797016908 | 0.155756455  | -11.59735108 | 8.55E-31    | 3.02E-29     |
| hsa-miR-532-5p                 | 1125.468773 | 0.695654237            | 0.078239191 | 8.891378141   | 6.04E-19  | 7.74E-18                | hsa-miR-532-5p                 | 1125.468773 | 0.260229184  | 0.079553692  | 3.271742345  | 0.001068869 | 0.004417614  |
| hsa-miR-654-3p                 | 13.42200058 | -4.235387462           | 0.485539405 | -8.723056087  | 2.71E-18  | 6.21E-17                | hsa-miR-654-3p                 | 13.42200058 | -2.664410675 | 0.44096176   | -6.042271504 | 1.52E-09    | 1.48E-08     |
| hsa-miR-424-5p                 | 1822.764579 | 1.094784659            | 0.128748952 | 8.503251005   | 1.84E-17  | 4.10E-16                | hsa-miR-424-5p                 | 1822.764579 | -1.24155735  | 0.129787089  | -0.95610827  | 0.338763722 | 0.514100414  |
| hsa-miR-29b-3p                 | 2042.461103 | 1.423293364            | 0.172893365 | 8.232208257   | 1.84E-16  | 3.98E-15                | hsa-miR-29b-3p                 | 2042.461103 | 1.383338964  | 0.173027864  | 7.994891296  | 1.30E-15    | 2.19E-14     |
| hsa-miR-137                    | 299.622076  | 0.980964467            | 0.102459083 | 8.010548855   | 2.66E-15  | 2.45E-14                | hsa-miR-137                    | 299.622076  | 0.799597437  | 0.124392593  | 6.428018196  | 1.29E-10    | 1.40E-09     |
| hsa-miR-15a-5p                 | 4056.027498 | 0.7941958823           | 0.100456659 | 7.905831854   | 2.66E-15  | 5.45E-14                | hsa-miR-15a-5p                 | 4056.027498 | 0.288496292  | 0.1100762826 | 2.862854331  | 0.004198435 | 0.014694524  |
| hsa-miR-146a-3p                | 85.58332522 | -1.367936819           | 0.173368172 | -7.890396381  | 3.01E-15  | 6.00E-14                | hsa-miR-146a-3p                | 85.58332522 | -0.064666979 | 0.161050284  | -0.40147075  | 0.688073566 | 0.812862957  |
| hsa-miR-582-3p                 | 2254.151628 | -1.377295922           | 0.175679377 | -7.838627006  | 4.51E-15  | 8.76E-14                | hsa-miR-582-3p                 | 2254.151628 | -0.950053534 | 0.175650409  | -5.408774958 | 6.35E-08    | 5.54E-07     |
| hsa-miR-149-5p                 | 413.1603781 | 1.085384459            | 0.140068176 | 7.74893076    | 9.29E-15  | 1.72E-13                | hsa-miR-149-5p                 | 413.1603781 | 0.582480846  | 0.142038162  | 4.100363896  | 6.34E-05    | 0.0002335672 |
| hsa-miR-887-3p                 | 47.02030475 | -1.683409734           | 0.217253319 | -7.748603053  | 9.29E-15  | 1.72E-13                | hsa-miR-887-3p                 | 47.02030475 | -2.177444063 | 0.238276042  | -9.138334015 | 4.13E-07    | 1.59E-18     |
| hsa-miR-200b-5p                | 20.23680555 | -2.679282529           | 0.330848498 | -7.636579725  | 2.23E-14  | 4.02E-13                | hsa-miR-200b-5p                | 20.23680555 | -1.758679053 | 0.332859984  | -5.28354004  | 1.27E-07    | 1.06E-06     |
| hsa-miR-130a-3p                | 14847.06589 | 0.577320817            | 0.07561373  | 7.620258449   | 2.53E-14  | 4.46E-13                | hsa-miR-130a-3p                | 14847.06589 | 0.148262351  | 0.075866838  | 1.954424489  | 0.05067231  | 0.123424404  |
| hsa-miR-1303                   | 50.40612479 | -1.531229154           | 0.204476755 | -7.438852433  | 6.97E-14  | 1.20E-12                | hsa-miR-1303                   | 50.40612479 | -1.065488238 | 0.202553362  | -5.260232208 | 1.44E-07    | 1.18E-06     |
| hsa-miR-260-5p                 | 22825.132   | 0.658741603            | 0.088628648 | 7.432063566   | 1.06E-13  | 1.79E-12                | hsa-miR-260-5p                 | 22825.132   | 0.634012631  | 0.08865558   | 7.151412609  | 8.59E-13    | 1.47E-11     |
| hsa-miR-17-3p                  | 1121.517951 | 0.875036608            | 0.11855936  | 7.380573564   | 1.58E-13  | 2.59E-12                | hsa-miR-17-3p                  | 1121.517951 | 0.159021527  | 0.119729129  | 1.32817743   | 0.184119499 | 0.340621073  |
| hsa-miR-550a-3p                | 78.15896799 | -1.514419682           | 0.207675314 | -7.2922246971 | 3.05E-13  | 4.91E-12                | hsa-miR-550a-3p                | 78.15896799 | -0.547794419 | 0.200473779  | -2.732499089 | 0.006285585 | 0.020871364  |

|                   |              |              |              |               |          |          |                    |              |               |              |              |             |              |
|-------------------|--------------|--------------|--------------|---------------|----------|----------|--------------------|--------------|---------------|--------------|--------------|-------------|--------------|
| hsa-mir-30e-3p    | 6419.898723  | -0.493829758 | 0.068134995  | -7.247813765  | 4.24E-13 | 6.68E-12 | hsa-mir-30e-3p     | 6419.898723  | -0.280587042  | 0.068197841  | -4.114309743 | 3.88E-05    | 0.000223511  |
| hsa-mir-30a-5p    | 48.523943    | 1.513963429  | 0.209442818  | 7.228521877   | 4.88E-13 | 7.54E-12 | hsa-mir-30a-5p     | 48.523943    | -0.157463889  | 0.236760899  | -0.665075607 | 0.596002135 | 0.6596790569 |
| hsa-mir-301a-3p   | 9398.4455683 | 0.671075396  | 0.092894728  | 7.224041787   | 5.05E-13 | 7.64E-12 | hsa-mir-301a-3p    | 9398.4455683 | 0.024432193   | 0.039306953  | 0.2661324681 | 0.793842135 | 0.884957444  |
| hsa-mir-455-5p    | 954.6964002  | 0.933054622  | 0.129800844  | 7.188355606   | 6.56E-13 | 9.73E-12 | hsa-mir-455-5p     | 954.6964002  | 0.314039507   | 0.130903288  | 2.399019252  | 0.01644905  | 0.047660978  |
| hsa-mir-561-5p    | 3088.173101  | -0.910186049 | 0.12667332   | -7.183501909  | 6.71E-13 | 9.76E-12 | hsa-mir-561-5p     | 3088.173101  | 0.052359377   | 0.126406777  | 0.414213371  | 0.67871785  | 0.806627655  |
| hsa-mir-1262      | 85.06215494  | -1.80492697  | 0.164490234  | -7.176673444  | 7.14E-13 | 1.02E-11 | hsa-mir-1262       | 85.06215494  | -1.289022252  | 0.171522702  | -7.51516959  | 5.68E-14    | 8.49E-13     |
| hsa-mir-660-5p    | 696.4884382  | 0.67664825   | 0.096548141  | 7.008402658   | 2.41E-12 | 3.38E-11 | hsa-mir-660-5p     | 696.4884382  | 0.359883365   | 0.097981126  | 3.672578399  | 0.000240115 | 0.001173394  |
| hsa-mir-106b-5p   | 946.1814405  | 0.756298079  | 0.108354275  | 6.979866762   | 2.95E-12 | 4.07E-11 | hsa-mir-106b-5p    | 946.1814405  | 0.1133220578  | 0.109787499  | 1.031202128  | 0.30241412  | 0.481163136  |
| hsa-mir-335-3p    | 156.627618   | 0.796382898  | 0.114549896  | 6.952279525   | 3.59E-12 | 4.77E-11 | hsa-mir-335-3p     | 156.627618   | -2.580647496  | 0.172151707  | -14.9905426  | 8.47E-51    | 7.31E-49     |
| hsa-mir-33b-5p    | 460.3247931  | 1.44575247   | 0.207940161  | 6.925332229   | 3.58E-12 | 4.77E-11 | hsa-mir-33b-5p     | 460.3247931  | 0.726217462   | 0.209301772  | 3.469972831  | 0.000520511 | 0.002337786  |
| hsa-mir-30c-2-3p  | 1577.449105  | -0.747098347 | 0.109762297  | -6.806434007  | 1.00E-11 | 1.31E-10 | hsa-mir-30c-2-3p   | 1577.449105  | -0.1620748524 | 0.109546298  | -1.479507092 | 0.139004837 | 0.27274434   |
| hsa-mir-3614-5p   | 57.85485634  | 1.546071378  | 0.222722768  | 6.804060055   | 1.02E-11 | 1.31E-10 | hsa-mir-3614-5p    | 57.85485634  | 1.447481548   | 0.230984303  | 6.266579706  | 3.69E-10    | 6.82E-09     |
| hsa-mir-190-3p    | 7312.017965  | 0.756066498  | 0.111195416  | 6.799439426   | 1.05E-11 | 1.33E-10 | hsa-mir-190-3p     | 7312.017965  | 0.461001984   | 0.111308253  | 4.14166938   | 3.45E-05    | 0.000201428  |
| hsa-mir-339-5p    | 129.3143059  | 0.890934329  | 0.132151621  | 6.741758594   | 1.56E-11 | 1.94E-10 | hsa-mir-339-5p     | 129.3143059  | 0.793751541   | 0.135626912  | 5.885246344  | 4.84E-09    | 4.43E-08     |
| hsa-mir-421       | 3490.112886  | -0.366865428 | 0.054618669  | -6.716850367  | 1.86E-11 | 2.27E-10 | hsa-mir-421        | 3490.112886  | -0.271337212  | 0.054866006  | -4.945452208 | 7.60E-07    | 5.52E-06     |
| hsa-mir-181b-3p   | 203.1482792  | -1.148665691 | 0.171051175  | -6.704810359  | 2.02E-11 | 2.42E-10 | hsa-mir-181b-3p    | 203.1482792  | 0.230495462   | 0.165804959  | 1.390160236  | 0.164480225 | 0.311710085  |
| hsa-mir-899-3p    | 5.739874971  | -3.521053438 | 0.5312020362 | -6.630731491  | 3.34E-11 | 3.95E-10 | hsa-mir-899-3p     | 5.739874971  | -2.146888916  | 0.506715287  | -4.236874182 | 2.27E-05    | 0.000135469  |
| hsa-mir-32-5p     | 168.3456809  | 1.182995728  | 0.18475271   | 6.403130582   | 1.52E-10 | 1.77E-09 | hsa-mir-32-5p      | 168.3456809  | 0.884701497   | 0.18731319   | 4.723113707  | 2.32E-06    | 1.53E-05     |
| hsa-mir-920-3p    | 9269.748105  | 0.615663302  | 0.09647574   | 6.381534883   | 1.75E-10 | 2.01E-09 | hsa-mir-920-3p     | 9269.748105  | -0.529894898  | 0.096762772  | -5.476226903 | 4.34E-08    | 3.84E-07     |
| hsa-let-7g-5p     | 28469.50881  | 0.49022346   | 0.076929744  | 6.379044084   | 1.85E-10 | 2.09E-09 | hsa-let-7g-5p      | 28469.50881  | 0.338856144   | 0.076963793  | 4.400200817  | 1.08E-05    | 6.62E-05     |
| hsa-mir-147b      | 181.965516   | -1.168566701 | 0.184958521  | -6.31799319   | 2.65E-10 | 2.95E-09 | hsa-mir-147b       | 181.965516   | 0.523985569   | 0.177823808  | 2.94665587   | 0.003212305 | 0.011449361  |
| hsa-mir-146a-5p   | 82182.66806  | -1.333338809 | 0.21166918   | -6.299329188  | 2.99E-10 | 3.28E-09 | hsa-mir-146a-5p    | 82182.66806  | -0.170302659  | 0.211655463  | -0.804622079 | 0.421037797 | 0.5968612592 |
| hsa-mir-22-3p     | 624042.8787  | 0.409247973  | 0.064999933  | 6.296717922   | 3.04E-10 | 3.29E-09 | hsa-mir-22-3p      | 624042.8787  | 0.1302465743  | 0.064997892  | 20.0388431   | 2.54E-89    | 6.58E-87     |
| hsa-mir-4435      | 21.89532984  | -1.947184921 | 0.310144949  | -6.278348018  | 3.42E-10 | 3.65E-09 | hsa-mir-4435       | 21.89532984  | -1.921394873  | 0.320629142  | -5.99257161  | 2.07E-09    | 1.98E-08     |
| hsa-mir-330-5p    | 1126.253718  | 0.915008201  | 0.150469338  | 6.081027618   | 1.19E-09 | 1.26E-08 | hsa-mir-330-5p     | 1126.253718  | 0.481576679   | 0.1510961    | 3.187221104  | 0.001436469 | 0.005723777  |
| hsa-mir-218-5p    | 1543.714515  | 0.817983739  | 0.135525758  | 6.036533009   | 1.58E-09 | 1.64E-08 | hsa-mir-218-5p     | 1543.714515  | 0.388342343   | 0.136046359  | 2.884485371  | 0.004310662 | 0.01501966   |
| hsa-mir-29c-3p    | 1028.87084   | 0.782788788  | 0.132297354  | 5.916889206   | 3.42E-09 | 3.36E-08 | hsa-mir-29c-3p     | 1028.87084   | 0.498596427   | 0.132943471  | 3.750158355  | 0.000176723 | 0.000888895  |
| hsa-mir-152-5p    | 250.299868   | 0.84221132   | 0.142496961  | 5.910406628   | 3.41E-09 | 3.44E-08 | hsa-mir-152-5p     | 250.299868   | 2.209999627   | 0.138760077  | 15.92674545  | 4.13E-57    | 4.01E-55     |
| hsa-mir-181b-2-3p | 81.62205315  | -1.084766542 | 0.186273429  | -5.823528057  | 5.76E-09 | 5.74E-08 | hsa-mir-181b-2-3p  | 81.62205315  | -0.923164977  | 0.188844832  | -4.88844201  | 1.02E-06    | 7.18E-06     |
| hsa-mir-31-5p     | 45082.27763  | 0.288406956  | 0.050268241  | 5.737359201   | 9.62E-09 | 9.45E-08 | hsa-mir-31-5p      | 45082.27763  | 0.4428235947  | 0.050282317  | 8.806792808  | 1.29E-18    | 2.94E-17     |
| hsa-mir-516a-5p   | 108.6147032  | -0.984419163 | 0.172173205  | -5.717609559  | 1.08E-08 | 1.05E-07 | hsa-mir-516a-5p    | 108.6147032  | -1.825556505  | 0.18660336   | -9.783130673 | 1.33E-22    | 3.56E-21     |
| hsa-mir-550a-5p   | 154.8134969  | -0.931024568 | 0.163389256  | -5.69819943   | 1.21E-08 | 1.16E-07 | hsa-mir-550a-5p    | 154.8134969  | 0.55184505    | 0.155681087  | 3.544714773  | 0.000393038 | 0.001828686  |
| hsa-mir-29a-5p    | 263.9911845  | 0.780583797  | 0.13950583   | 5.595348953   | 2.20E-08 | 2.08E-07 | hsa-mir-29a-5p     | 263.9911845  | 1.0133664489  | 0.139980903  | 7.241448412  | 4.44E-13    | 6.39E-12     |
| hsa-mir-548e-5p   | 73.59296608  | -0.825096474 | 0.149396927  | -5.522847693  | 3.34E-08 | 3.12E-07 | hsa-mir-548e-5p    | 73.59296608  | -1.140198224  | 0.161145402  | -7.075566435 | 1.49E-12    | 1.96E-11     |
| hsa-mir-193b-5p   | 19.6551514   | -1.826192375 | 0.333119403  | -5.482095486  | 4.20E-08 | 3.88E-07 | hsa-mir-193b-5p    | 19.6551514   | -0.852717488  | 0.317598974  | -2.684887412 | 0.007255424 | 0.023887562  |
| hsa-mir-3129-3p   | 39.65298963  | -1.186866049 | 0.219061208  | -5.417965404  | 6.03E-08 | 5.50E-07 | hsa-mir-3129-3p    | 39.65298963  | -1.194035048  | 0.227160821  | -5.256342371 | 1.47E-07    | 1.18E-06     |
| hsa-mir-671-3p    | 345.0779095  | -0.912999939 | 0.168816663  | -5.408233539  | 6.36E-08 | 6.96E-07 | hsa-mir-671-3p     | 345.0779095  | -0.145207939  | 0.167648775  | -0.866143751 | 0.386411335 | 0.560762222  |
| hsa-mir-210-5p    | 122.102132   | 1.194770708  | 0.222434599  | 5.371334834   | 7.82E-08 | 6.96E-07 | hsa-mir-210-5p     | 122.102132   | 1.53497131    | 0.222558483  | 6.886934644  | 5.31E-12    | 6.35E-11     |
| hsa-mir-1285-3p   | 465.2000038  | -0.487863    | 0.091281514  | -5.344596049  | 9.06E-08 | 7.98E-07 | hsa-mir-1285-3p    | 465.2000038  | -0.600132494  | 0.0993300737 | -6.432327481 | 1.26E-10    | 1.38E-09     |
| hsa-mir-484       | 2356.609345  | 0.362707612  | 0.067990676  | 5.334666927   | 9.57E-08 | 8.33E-07 | hsa-mir-484        | 2356.609345  | 0.319005334   | 0.06897832   | 4.624718817  | 3.75E-06    | 2.39E-05     |
| hsa-mir-374a-5p   | 718.6810692  | 0.721498495  | 0.135858271  | 5.318498959   | 1.05E-07 | 9.30E-07 | hsa-mir-374a-5p    | 718.6810692  | 0.486778668   | 0.136477141  | 3.640013723  | 0.000272624 | 0.001315705  |
| hsa-mir-450a-5p   | 243.8905037  | 0.729926004  | 0.137822168  | 5.296143687   | 1.18E-07 | 1.01E-06 | hsa-mir-450a-5p    | 243.8905037  | -0.187707905  | 0.143488146  | -1.308177082 | 0.190813253 | 0.349674287  |
| hsa-mir-3163      | 20.17734969  | -1.65444478  | 0.316534797  | -5.226739033  | 1.73E-07 | 1.45E-06 | hsa-mir-3163       | 20.17734969  | -0.337935433  | 0.292000066  | -1.157312867 | 0.247144558 | 0.442048681  |
| hsa-mir-155-5p    | 22124.17335  | 0.611885254  | 0.11836164   | 5.169322989   | 2.53E-07 | 2.09E-06 | hsa-mir-155-5p     | 22124.17335  | -0.023666352  | 0.118419385  | -0.2000200   | 0.841464236 | 0.919756567  |
| hsa-mir-942-5p    | 190.0935597  | -0.697890881 | 0.133589199  | -5.1547401309 | 2.54E-07 | 1.95E-06 | hsa-mir-942-5p     | 190.0935597  | -1.290439519  | 0.142831968  | -9.034699578 | 1.64E-19    | 3.99E-18     |
| hsa-mir-629-5p    | 149.1763913  | -0.86537275  | 0.169213974  | -5.114087909  | 3.15E-07 | 2.57E-06 | hsa-mir-629-5p     | 149.1763913  | -0.319719813  | 0.168021396  | -1.902851785 | 0.057059888 | 0.133582669  |
| hsa-mir-548av-5p  | 870.5267962  | -0.383935856 | 0.075159846  | -5.108559811  | 3.25E-07 | 2.61E-06 | hsa-mir-548av-5p/5 | 870.5267962  | -0.528628466  | 0.076541061  | -6.904646899 | 4.97E-12    | 6.03E-11     |
| /548k             | 31.3239792   | -1.308875243 | 0.26021087   | -5.03005599   | 4.90E-07 | 3.91E-06 | hsa-mir-195-3p     | 31.3239792   | -1.064177925  | 0.262915604  | -4.047602768 | 5.17E-05    | 0.00028925   |
| hsa-let-7f-1-3p   | 244.6331745  | -0.859938148 | 0.17573788   | -4.983014504  | 6.26E-07 | 4.89E-06 | hsa-let-7f-1-3p    | 244.6331745  | 0.526503494   | 0.168536295  | 3.123976911  | 0.001784245 | 0.006663159  |
| hsa-mir-101-3p    | 12864.75804  | 0.840418877  | 0.168831241  | 4.987555519   | 6.24E-07 | 4.89E-06 | hsa-mir-101-3p     | 12864.75804  | 0.260182837   | 0.168690287  | 1.5423639991 | 0.122298371 | 0.251469322  |

|                  |             |               |             |              |             |             |                    |             |              |             |               |             |              |
|------------------|-------------|---------------|-------------|--------------|-------------|-------------|--------------------|-------------|--------------|-------------|---------------|-------------|--------------|
| hsa-mir-3681-5p  | 7.919238811 | -2.394546881  | 0.483861407 | -4.948828    | 7.47E-07    | 5.77E-06    | hsa-mir-3681-5p    | 7.919238811 | -0.150953183 | 0.434500913 | -0.347417412  | 0.728277754 | 0.837088484  |
| hsa-mir-497-5p   | 88.32922669 | -0.780447306  | 0.159175337 | -4.90366787  | 9.44E-07    | 7.21E-06    | hsa-mir-497-5p     | 88.32922669 | -1.470756688 | 0.157121793 | -8.712423909  | 2.97E-18    | 6.42E-17     |
| hsa-mir-148b-3p  | 13294.36846 | 0.267130636   | 0.054550694 | 4.896924562  | 9.73E-07    | 7.37E-06    | hsa-mir-148b-3p    | 13294.36846 | 0.508782163  | 0.054548466 | 8.62644433    | 6.33E-18    | 1.33E-16     |
| hsa-mir-18a-5p   | 519.4247638 | 0.538024675   | 0.112735881 | 4.772435112  | 1.82E-06    | 1.36E-05    | hsa-mir-18a-5p     | 519.4247638 | 0.043814191  | 0.114891713 | 0.381335204   | 0.702942033 | 0.822266216  |
| hsa-mir-4661-5p  | 185.2226352 | -1.003973355  | 0.211012957 | 4.75788486   | 1.96E-06    | 1.45E-05    | hsa-mir-4661-5p    | 185.2226352 | 0.086855629  | 0.20794329  | 0.465779053   | 0.64137366  | 0.779886282  |
| hsa-mir-548      | 17.73938436 | -1.405486055  | 0.295789815 | 4.751637762  | 2.02E-06    | 1.48E-05    | hsa-mir-548        | 17.73938436 | -1.362451131 | 0.306286861 | -4.448284609  | 8.66E-06    | 5.34E-05     |
| hsa-mir-153-3p   | 13.69635957 | 1.657788544   | 0.349039348 | 4.745656353  | 2.04E-06    | 1.48E-05    | hsa-mir-153-3p     | 13.69635957 | 1.215933396  | 0.36253241  | 3.353999154   | 0.000796556 | 0.003419341  |
| hsa-mir-10b-3p   | 206.3133395 | 0.514597064   | 0.109988317 | 4.678844939  | 2.88E-06    | 2.08E-05    | hsa-mir-10b-3p     | 206.3133395 | 0.44270515   | 0.112660701 | 3.929543738   | 8.51E-05    | 0.000494852  |
| hsa-mir-3196     | 53.03928639 | 0.867323737   | 0.185639779 | 4.672079117  | 2.98E-06    | 2.13E-05    | hsa-mir-3196       | 53.03928639 | 0.021123252  | 0.201723615 | 0.104713828   | 0.916602889 | 0.963735379  |
| hsa-mir-4662-5p  | 14.80846345 | -1.566955474  | 0.337580785 | -4.641719916 | 3.46E-06    | 2.44E-05    | hsa-mir-4662-5p    | 14.80846345 | -1.136518444 | 0.335721236 | -3.385433274  | 0.00071066  | 0.00308482   |
| hsa-mir-196b-5p  | 3582.498282 | -0.379038184  | 0.081742285 | -4.639090316 | 3.55E-06    | 2.46E-05    | hsa-mir-196b-5p    | 3582.498282 | -1.400156838 | 0.082760502 | -1.678187713  | 3.31E-64    | 5.14E-62     |
| hsa-mir-455-3p   | 66.49274248 | 0.821086078   | 0.170722196 | 4.637013011  | 4.60E-06    | 3.17E-05    | hsa-mir-455-3p     | 66.49274248 | 0.433136269  | 0.185155992 | 2.33962867    | 0.01930261  | 0.054738576  |
| hsa-mir-3150b-3p | 3.589517064 | -2.510228464  | 0.547834193 | -4.582095267 | 4.60E-06    | 3.17E-05    | hsa-mir-3150b-3p   | 3.589517064 | -0.748300505 | 0.52946756  | -1.413307559  | 0.157565312 | 0.300806505  |
| hsa-mir-50c-1-3p | 31.7334633  | -0.624580459  | 0.136566489 | -4.573516914 | 4.80E-06    | 3.27E-05    | hsa-mir-50c-1-3p   | 31.7334633  | -1.00975104  | 0.139850827 | -7.220200712  | 5.19E-13    | 7.20E-12     |
| hsa-mir-19a-3p   | 3994.26563  | 0.592611158   | 0.130809252 | 4.530345886  | 5.89E-06    | 3.94E-05    | hsa-mir-19a-3p     | 3994.26563  | 0.416949321  | 0.130952938 | 3.183963097   | 0.001452735 | 0.005759058  |
| hsa-mir-409-3p   | 3.944843922 | -2.434868825  | 0.540194801 | -4.507390337 | 6.56E-06    | 4.36E-05    | hsa-mir-409-3p     | 3.944843922 | -0.185028708 | 0.505744018 | -0.365854467  | 0.714473675 | 0.828576187  |
| hsa-mir-577      | 1854.311356 | 0.341228221   | 0.076410031 | 4.465715609  | 7.98E-06    | 5.25E-05    | hsa-mir-577        | 1854.311356 | -0.64317485  | 0.078063939 | -8.229077564  | 1.74E-16    | 3.21E-15     |
| hsa-mir-574-5p   | 147.4446539 | 0.81910662    | 0.185620082 | 4.454171916  | 1.02E-05    | 6.66E-05    | hsa-mir-574-5p     | 147.4446539 | 0.185042231  | 0.185042231 | 7.145038484   | 9.00E-13    | 4.39E-06     |
| hsa-mir-128-3p   | 2331.449826 | 0.312949089   | 0.17062717  | 4.354818473  | 1.33E-05    | 8.62E-05    | hsa-mir-128-3p     | 2331.449826 | -0.36393883  | 0.072883311 | -4.993305385  | 5.94E-07    | 4.39E-06     |
| hsa-mir-659-5p   | 58.78354008 | 0.972355658   | 0.223613412 | 4.348391493  | 1.37E-05    | 8.80E-05    | hsa-mir-659-5p     | 58.78354008 | 1.31212835   | 0.22387525  | 5.861178644   | 4.60E-09    | 4.25E-08     |
| hsa-mir-196a-3p  | 54.44915415 | 0.897347128   | 0.2104535   | 4.263873633  | 2.01E-05    | 0.000127808 | hsa-mir-196a-3p    | 54.44915415 | 0.387883386  | 0.219728269 | 1.765286678   | 0.077515597 | 0.174578606  |
| hsa-mir-3129-5p  | 40.03034128 | -1.167291759  | 0.274233338 | -4.256566107 | 2.08E-05    | 0.000130955 | hsa-mir-3129-5p    | 40.03034128 | -0.8109795   | 0.274441108 | -2.955021953  | 0.003126468 | 0.0112466    |
| hsa-mir-27a-5p   | 2543.709729 | -0.554898493  | 0.13059213  | -4.249095706 | 2.15E-05    | 0.00013428  | hsa-mir-27a-5p     | 2543.709729 | 1.334421829  | 0.129813726 | 10.27794469   | 8.86E-25    | 2.75E-23     |
| hsa-mir-25-5p    | 254.7052563 | -1.035855352  | 0.244039486 | -4.244700186 | 2.19E-05    | 0.000135817 | hsa-mir-25-5p      | 254.7052563 | -1.140764638 | 0.245410202 | -4.648399412  | 3.35E-06    | 2.15E-05     |
| hsa-mir-891a-5p  | 213.3954846 | -0.7473787968 | 0.176751701 | -4.22846657  | 2.35E-05    | 0.000143643 | hsa-mir-891a-5p    | 213.3954846 | -1.002892619 | 0.179799774 | -5.577830239  | 2.44E-08    | 2.20E-07     |
| hsa-mir-99a-5p   | 1062.692178 | 0.467449007   | 0.110508994 | 4.229696464  | 2.34E-05    | 0.000145643 | hsa-mir-99a-5p     | 1062.692178 | 0.248792923  | 0.111227541 | 2.236219874   | 0.025337372 | 0.0685963    |
| hsa-mir-625-3p   | 1598.625211 | 0.332800847   | 0.078880821 | 4.223317012  | 2.41E-05    | 0.000149788 | hsa-mir-625-3p     | 1598.625211 | -0.749985966 | 0.078749268 | 9.5237199     | 1.67E-21    | 4.33E-20     |
| hsa-mir-199a-3p  | 24.65931773 | -1.170557085  | 0.277331105 | -4.220792627 | 2.43E-05    | 0.00014626  | hsa-mir-199a-3p    | 24.65931773 | -0.60365497  | 0.277896154 | -2.221925671  | 0.026288329 | 0.070923722  |
| hsa-mir-17-5p    | 4523.582359 | 0.488998076   | 0.116906011 | 4.182830908  | 2.88E-05    | 0.000171607 | hsa-mir-17-5p/106a | 4523.582359 | -0.221101154 | 0.117219038 | -1.800147346  | 0.071837375 | 0.165140949  |
| hsa-mir-33a-5p   | 317.7716265 | 0.853376535   | 0.204400246 | 4.175026936  | 2.98E-05    | 0.00017621  | hsa-mir-33a-5p     | 317.7716265 | -0.117825076 | 0.207241356 | -0.568540367  | 0.569668104 | 0.720417594  |
| hsa-mir-627-5p   | 93.28701561 | -0.698147373  | 0.168224741 | -4.150087364 | 3.32E-05    | 0.000193601 | hsa-mir-627-5p     | 93.28701561 | -0.604314483 | 0.17122165  | -3.529427987  | 0.000416459 | 0.001926123  |
| hsa-mir-93-5p    | 7506.739325 | 0.270307713   | 0.065134357 | 4.150002025  | 3.32E-05    | 0.000193601 | hsa-mir-93-5p      | 7506.739325 | -0.444632358 | 0.065506509 | -6.78760575   | 1.14E-11    | 1.28E-10     |
| hsa-mir-194-5p   | 195.3663566 | 0.483972492   | 0.117602755 | 4.115315942  | 3.87E-05    | 0.000222343 | hsa-mir-194-5p     | 195.3663566 | -0.178727935 | 0.124266326 | -1.438265224  | 0.150358815 | 0.290618904  |
| hsa-mir-1260b    | 44.06965697 | 1.394799229   | 0.340934407 | 4.091107263  | 4.29E-05    | 0.000246208 | hsa-mir-1260b      | 44.06965697 | 2.074090463  | 0.33921151  | 6.114434461   | 9.69E-10    | 9.65E-09     |
| hsa-mir-374b-5p  | 514.432078  | 0.371597837   | 0.091403702 | 4.065457161  | 4.79E-05    | 0.000272852 | hsa-mir-374b-5p    | 514.432078  | 0.643886123  | 0.091697439 | 7.021309739   | 2.20E-12    | 2.80E-11     |
| hsa-mir-34c-5p   | 747.7546225 | 0.414760899   | 0.102189714 | 4.058734337  | 4.93E-05    | 0.000278731 | hsa-mir-34c-5p     | 747.7546225 | 0.360896847  | 0.10298041  | 3.504519413   | 0.000457432 | 0.002090734  |
| hsa-mir-299-3p   | 4.02831925  | -2.18430781   | 0.540336035 | -4.04249887  | 5.29E-05    | 0.000296545 | hsa-mir-299-3p     | 4.02831925  | -1.751929974 | 0.539492611 | -3.2447366025 | 0.001164785 | 0.004763357  |
| hsa-mir-324-3p   | 242.9754837 | 0.733656295   | 0.107463678 | 4.035755531  | 5.45E-05    | 0.00030344  | hsa-mir-324-3p     | 242.9754837 | -0.031602837 | 0.112161653 | -0.281759876  | 0.778127639 | 0.883706691  |
| hsa-mir-4662a-5p | 370.775784  | -0.511875245  | 0.12850192  | -4.029957564 | 5.58E-05    | 0.000308253 | hsa-mir-4662a-5p   | 370.775784  | 0.155542653  | 0.127476465 | 1.220169953   | 0.222400796 | 0.383765183  |
| hsa-mir-196a-5p  | 1741.885971 | -0.377759407  | 0.093997273 | -4.018833677 | 5.85E-05    | 0.000320831 | hsa-mir-196a-5p    | 1741.885971 | -0.851785997 | 0.094955941 | -8.970328656  | 2.96E-19    | 6.96E-18     |
| hsa-mir-3677-3p  | 75.00681967 | 0.7317103943  | 0.184174491 | 3.972884294  | 7.10E-05    | 0.00038671  | hsa-mir-3677-3p    | 75.00681967 | 0.331743889  | 0.1912674   | 1.734450764   | 0.082838135 | 0.1383900659 |
| hsa-mir-1294     | 22.37847542 | -1.046930265  | 0.262390484 | -3.972103955 | 7.28E-05    | 0.00039337  | hsa-mir-1294       | 22.37847542 | -1.114667308 | 0.274672026 | -4.058117289  | 4.95E-05    | 0.000206469  |
| hsa-mir-216b-5p  | 1.76265724  | -2.154679879  | 0.549368378 | -3.922103955 | 8.78E-05    | 0.000471268 | hsa-mir-216b-5p    | 1.76265724  | -2.062684926 | 0.545871968 | -3.778697282  | 0.000157651 | 0.000800619  |
| hsa-mir-195-5p   | 56.70028377 | -0.825522681  | 0.21131583  | -3.908140387 | 9.30E-05    | 0.000495831 | hsa-mir-195-5p     | 56.70028377 | -1.192839916 | 0.222223981 | -5.367737133  | 7.97E-08    | 6.81E-07     |
| hsa-mir-324-5p   | 86.44164079 | 0.630586357   | 0.162298754 | 3.883434319  | 0.000102185 | 0.00054094  | hsa-mir-324-5p     | 86.44164079 | 0.515888196  | 0.166744095 | 3.09389184    | 0.001975495 | 0.007487608  |
| hsa-mir-4706-5p  | 70.99025956 | -0.775359704  | 0.200786607 | -3.861610674 | 0.000112422 | 0.00054094  | hsa-mir-4706-5p    | 70.99025956 | -1.030318016 | 0.208518471 | -4.941135487  | 7.77E-07    | 5.59E-06     |
| hsa-mir-3200-3p  | 32.17727285 | 1.068617493   | 0.22771452  | 3.855792927  | 0.000115544 | 0.000602226 | hsa-mir-3200-3p    | 32.17727285 | 0.711170741  | 0.208491625 | 2.491103883   | 0.012737018 | 0.030806407  |
| hsa-mir-216a-3p  | 4.336576962 | -2.102733919  | 0.548155482 | -3.836028921 | 0.000125204 | 0.000648324 | hsa-mir-216a-3p    | 4.336576962 | -1.550941068 | 0.546564404 | -2.837618138  | 0.004545152 | 0.015695926  |
| hsa-let-7e-3p    | 51.5852128  | -0.835623156  | 0.219374287 | -3.809120776 | 0.000139462 | 0.000718181 | hsa-let-7e-3p      | 51.5852128  | 0.353688141  | 0.207908813 | 1.701169542   | 0.088911155 | 0.19189991   |

|                   |             |               |             |               |             |              |                   |             |              |             |              |              |              |
|-------------------|-------------|---------------|-------------|---------------|-------------|--------------|-------------------|-------------|--------------|-------------|--------------|--------------|--------------|
| hsa-miR-4677-3p   | 245.3480145 | -0.677019216  | 0.178746606 | -3.787592008  | 0.000152114 | 0.000778004  | hsa-miR-4677-3p   | 245.3480145 | -0.566376265 | 0.179750318 | -3.150905486 | 0.001627652  | 0.0006223426 |
| hsa-miR-151a-3p   | 67414.48534 | 0.256126968   | 0.067797466 | 3.777825405   | 0.000158702 | 0.000803761  | hsa-miR-151a-3p   | 67414.48534 | -0.110785036 | 0.067822896 | -1.632981634 | 0.102491612  | 0.215829464  |
| hsa-miR-940       | 53.29089108 | 0.855170364   | 0.226713296 | 3.772034355   | 0.000161924 | 0.000881766  | hsa-miR-940       | 53.29089108 | 0.582305986  | 0.232863096 | 2.499477614  | 0.0124737656 | 0.037312967  |
| hsa-miR-4461      | 58.19951322 | -0.748256257  | 0.198567269 | -3.768279904  | 0.000164379 | 0.000824072  | hsa-miR-4461      | 58.19951322 | 0.858418782  | 0.187919496 | 4.750006502  | 2.03E-06     | 1.39E-05     |
| hsa-miR-10a-3p    | 1516.279745 | 0.246800552   | 0.066477611 | 3.715244119   | 0.000203008 | 0.001011031  | hsa-miR-10a-3p    | 1516.279745 | 0.318978288  | 0.066915734 | 4.766885284  | 1.87E-06     | 1.29E-05     |
| hsa-miR-345-5p    | 4782.048529 | -0.33520606   | 0.309509026 | -3.703564985  | 0.000212591 | 0.001051838  | hsa-miR-345-5p    | 4782.048529 | -0.690759775 | 0.299081564 | -7.606511776 | 2.82E-14     | 5.29E-13     |
| hsa-miR-6842-3p   | 29.00043411 | -1.139484629  | 0.005986575 | -0.731684629  | 0.00021606  | 0.001062060  | hsa-miR-6842-3p   | 29.00043411 | 0.388557802  | 0.09953144  | -1.295394843 | 0.195184056  | 0.355958996  |
| hsa-miR-101-5p    | 51.48628501 | 0.7313217371  | 0.200060457 | 3.67997446    | 0.000233257 | 0.001199199  | hsa-miR-101-5p    | 51.48628501 | 0.715302418  | 0.204615144 | 3.4958442989 | 0.000472567  | 0.002147277  |
| hsa-miR-3613-5p   | 75.81018582 | 0.675951728   | 0.185273365 | 3.648402065   | 0.000263876 | 0.001280477  | hsa-miR-3613-5p   | 75.81018582 | 0.075572124  | 0.194361946 | 0.388821607  | 0.697408116  | 0.819797438  |
| hsa-miR-6087      | 37.63840051 | 0.807283552   | 0.222651773 | 3.62576746    | 0.000288105 | 0.0013369141 | hsa-miR-6087      | 37.63840051 | 0.353075368  | 0.234286412 | 1.507024521  | 0.131804372  | 0.260590323  |
| hsa-miR-3155a     | 5.595192262 | -1.818600589  | 0.50370182  | -3.6110629379 | 0.000304458 | 0.001454273  | hsa-miR-3155a     | 5.595192262 | -0.480693147 | 0.480685015 | -0.773921242 | 0.438977367  | 0.61524541   |
| hsa-miR-542-3p    | 398.598346  | 0.519531842   | 0.143851028 | 3.61195631    | 0.000305415 | 0.001454273  | hsa-miR-542-3p    | 398.598346  | 0.372012334  | 0.480685015 | -0.773921242 | 0.438977367  | 0.61524541   |
| hsa-miR-502-3p    | 75.434496   | 0.569030585   | 0.158103583 | 3.599099867   | 0.000319321 | 0.001510785  | hsa-miR-502-3p    | 75.434496   | 0.05072132   | 0.168219791 | 0.301518147  | 0.763019414  | 0.866763282  |
| hsa-miR-148a-3p   | 2971.253254 | 0.37829735    | 0.105260776 | 3.559396162   | 0.000325757 | 0.001516666  | hsa-miR-148a-3p   | 2971.253254 | -0.448247064 | 0.116221289 | -1.354500079 | 8.48E-42     | 5.07E-40     |
| hsa-miR-100-5p    | 574519.3604 | 0.416666915   | 0.116220575 | 3.585138977   | 0.000336899 | 0.001574274  | hsa-miR-100-5p    | 574519.3604 | 0.448247064  | 0.116221289 | -1.354500079 | 8.48E-42     | 5.07E-40     |
| hsa-miR-454-3p    | 1205.295203 | 0.289718787   | 0.081178244 | 3.568921603   | 0.000358454 | 0.001664472  | hsa-miR-454-3p    | 1205.295203 | -0.42556278  | 0.082997136 | -5.126999518 | 2.94E-07     | 2.22E-06     |
| hsa-miR-183-5p    | 8834.237202 | 0.163525029   | 0.045947747 | 3.558934635   | 0.000372362 | 0.001708353  | hsa-miR-183-5p    | 8834.237202 | 0.372256146  | 0.04600781  | 8.091151112  | 0.000626024  | 0.002765753  |
| hsa-miR-4645-3p   | 34.52831691 | -1.083656045  | 0.304239816 | -3.561848217  | 0.000368253 | 0.001699803  | hsa-miR-4645-3p   | 34.52831691 | -1.057608447 | 0.309234871 | -3.420081448 | 0.000626024  | 0.002765753  |
| hsa-miR-183-5p    | 8834.237202 | 0.163525029   | 0.045947747 | 3.558934635   | 0.000372362 | 0.001708353  | hsa-miR-183-5p    | 8834.237202 | 0.372256146  | 0.04600781  | 8.091151112  | 0.000626024  | 0.002765753  |
| hsa-miR-203a-3p   | 19.40205946 | 1.23370083    | 0.347159903 | 3.524937723   | 0.000423583 | 0.001920075  | hsa-miR-203a-3p   | 19.40205946 | -0.551520469 | 0.136487725 | -4.008006366 | 5.33E-05     | 0.000293539  |
| hsa-miR-450b-5p   | 798.0633631 | 0.473619983   | 0.143462672 | 3.524937723   | 0.000423583 | 0.001920075  | hsa-miR-450b-5p   | 798.0633631 | -0.551520469 | 0.136487725 | -4.008006366 | 5.33E-05     | 0.000293539  |
| hsa-miR-20b-5p    | 2745.905614 | 0.315838955   | 0.09059162  | 3.486398202   | 0.000489572 | 0.002020587  | hsa-miR-20b-5p    | 2745.905614 | -0.150130741 | 0.091111584 | -1.647609111 | 0.009416114  | 0.210480438  |
| hsa-miR-1288b     | 14.14746199 | 1.36747812    | 0.3924947   | 3.448407736   | 0.000498354 | 0.002212117  | hsa-miR-1288b     | 14.14746199 | 1.438861879  | 0.396186279 | 3.6317812    | 0.000281472  | 0.001350022  |
| hsa-miR-1298-5p   | 11.1397623  | -1.364803435  | 0.396611385 | -3.445483135  | 0.000570094 | 0.002538353  | hsa-miR-1298-5p   | 11.1397623  | -1.27732345  | 0.403589651 | -3.164909655 | 0.00151329   | 0.0068779    |
| hsa-miR-3605-3p   | 90.39219587 | -0.62521206   | 0.182291203 | -3.425492777  | 0.000604189 | 0.002674686  | hsa-miR-3605-3p   | 90.39219587 | -0.742776934 | 0.187280148 | -3.969991654 | 7.37E-05     | 0.000394967  |
| hsa-miR-425-5p    | 2877.582962 | -0.32297203   | 0.094839771 | -3.405494199  | 0.00060553  | 0.002907201  | hsa-miR-425-5p    | 2877.582962 | -0.383138791 | 0.095108396 | -4.028443392 | 5.61E-05     | 0.000307229  |
| hsa-miR-3159      | 18.8562204  | -1.353041812  | 0.399339316 | -3.388246671  | 0.00070341  | 0.003077926  | hsa-miR-3159      | 18.8562204  | -0.341005948 | 0.389937652 | -0.874512492 | 0.38183922   | 0.558736486  |
| hsa-le1-c-3p      | 17.20117523 | -1.292600931  | 0.386063714 | -3.348154425  | 0.000813517 | 0.00352965   | hsa-le1-c-3p      | 17.20117523 | -0.234000005 | 0.374200537 | -0.625566951 | 0.531612143  | 0.685016672  |
| hsa-miR-509-3p    | 44.32083895 | 0.932356217   | 0.280064288 | 3.333229824   | 0.000861336 | 0.003725892  | hsa-miR-509-3p    | 44.32083895 | -0.592615504 | 0.280420846 | -2.113030793 | 0.034574449  | 0.087506017  |
| hsa-miR-3913-5p   | 29.89120661 | -0.876921801  | 0.263314923 | -3.32957469   | 0.000866981 | 0.003741171  | hsa-miR-3913-5p   | 29.89120661 | -0.325322555 | 0.259915317 | -1.251648262 | 0.21066906   | 0.374627901  |
| hsa-miR-708-5p    | 121.1698651 | 0.450753345   | 0.136575596 | 3.300394501   | 0.00096549  | 0.004129243  | hsa-miR-708-5p    | 121.1698651 | 0.925695489  | 0.133735567 | 6.819844718  | 9.11E-12     | 1.06E-10     |
| hsa-miR-205-3p    | 5.72503562  | 1.810991487   | 0.549275827 | 3.29705295    | 0.000977051 | 0.00415521   | hsa-miR-205-3p    | 5.72503562  | 0.674914679  | 0.554288619 | 1.217623194  | 0.223367196  | 0.389139712  |
| hsa-miR-125b-1-3p | 15091.25038 | -0.175796646  | 0.053520176 | -3.28467992   | 0.001020983 | 0.004317788  | hsa-miR-125b-1-3p | 15091.25038 | 0.038401266  | 0.053551559 | 0.717089396  | 0.473318815  | 0.638427913  |
| hsa-miR-222-3p    | 84820.88939 | 0.416788612   | 0.127421255 | 3.270950447   | 0.001071867 | 0.004507979  | hsa-miR-222-3p    | 84820.88939 | 0.195410651  | 0.127429113 | 1.53348514   | 0.125156365  | 0.2539073    |
| hsa-le1-g-3p      | 71.0349218  | 0.573025003   | 0.173563349 | 3.26764404    | 0.001084467 | 0.004510666  | hsa-le1-g-3p      | 71.0349218  | 0.375105731  | 0.181230466 | 2.069771929  | 0.038473707  | 0.095508213  |
| hsa-miR-874-3p    | 99.15706293 | 0.644933713   | 0.197290769 | 3.2688950271  | 0.001079473 | 0.004510666  | hsa-miR-874-3p    | 99.15706293 | -0.216297681 | 0.205992376 | -1.0500276   | 0.293705424  | 0.473892861  |
| hsa-miR-340-5p    | 2903.894392 | 0.535638052   | 0.165127229 | 3.243788792   | 0.001179512 | 0.004879182  | hsa-miR-340-5p    | 2903.894392 | 0.164148147  | 0.165340803 | 0.992786683  | 0.320813921  | 0.500547021  |
| hsa-miR-1322      | 26.09863647 | -0.786127251  | 0.243187649 | -3.232595307  | 0.001226712 | 0.004992586  | hsa-miR-1322      | 26.09863647 | -0.392773943 | 0.242625748 | -1.618846912 | 0.105480206  | 0.220317527  |
| hsa-miR-140-3p    | 7906.914392 | 0.287216983   | 0.088810556 | 3.234041045   | 0.001220519 | 0.004992586  | hsa-miR-140-3p    | 7906.914392 | 0.528943501  | 0.088837051 | 5.954086689  | 2.62E-09     | 2.45E-08     |
| hsa-miR-182-5p    | 107347.4816 | 0.314981199   | 0.097291931 | 3.234161164   | 0.001220006 | 0.004992586  | hsa-miR-182-5p    | 107347.4816 | 0.211953769  | 0.097398494 | 2.254105237  | 0.024195209  | 0.066429957  |
| hsa-miR-625-3p    | 157.0502826 | -0.63577293   | 0.196902951 | -3.228663332  | 0.001242807 | 0.005031041  | hsa-miR-625-3p    | 157.0502826 | 0.20800006   | 0.19455745  | 1.069105444  | 0.285022258  | 0.465737405  |
| hsa-miR-574-3p    | 250.457121  | -0.6232959786 | 0.193956337 | -3.208287329  | 0.001333030 | 0.005367776  | hsa-miR-574-3p    | 250.457121  | 0.506498949  | 0.191568293 | 2.643966034  | 0.008194218  | 0.026528814  |
| hsa-miR-576-3p    | 76.81351757 | -0.448457389  | 0.142404142 | -3.149187825  | 0.001337249 | 0.005567766  | hsa-miR-576-3p    | 76.81351757 | -0.710675728 | 0.15208349  | -4.672931478 | 2.97E-06     | 1.94E-05     |
| hsa-miR-1275      | 515.1363644 | -0.5156633247 | 0.164673602 | -3.137316776  | 0.001705018 | 0.006793152  | hsa-miR-1275      | 515.1363644 | -0.47834287  | 0.165325587 | -2.893338411 | 0.0003811704 | 0.013462244  |
| hsa-miR-5480-3p   | 489.7142613 | -0.271829908  | 0.086711851 | -3.133552548  | 0.001715505 | 0.006793152  | hsa-miR-5480-3p   | 489.7142613 | 0.010650093  | 0.088805033 | -4.825186449 | 1.40E-06     | 9.79E-06     |
| hsa-miR-3176      | 154.1538131 | 0.485712998   | 0.155511624 | 3.123331544   | 0.001788223 | 0.007015904  | hsa-miR-3176      | 154.1538131 | 0.008254096  | 0.160455036 | 0.066399962  | 0.947059582  | 0.978975402  |
| hsa-miR-449a      | 58.06493822 | 0.672766328   | 0.215857424 | 3.116716189   | 0.001828775 | 0.00712969   | hsa-miR-449a      | 58.06493822 | 1.129490389  | 0.215054666 | 5.252107773  | 1.50E-07     | 1.19E-06     |
| hsa-miR-198-5p    | 77.50277933 | 0.709374684   | 0.228706399 | 3.101682712   | 0.001924241 | 0.007508807  | hsa-miR-198-5p    | 77.50277933 | 0.07559785   | 0.235769772 | 0.320642672  | 0.748481196  | 0.85274173   |
| hsa-miR-191-5p    | 95145.93679 | -0.514272161  | 0.166097828 | -3.09620412   | 0.001660154 | 0.007609417  | hsa-miR-191-5p    | 95145.93679 | -0.566455841 | 0.166102151 | -3.410286609 | 0.000648948  | 0.002833967  |
| hsa-miR-128-1-5p  | 139.4550333 | -0.506629119  | 0.16392784  | -3.090519427  | 0.001997782 | 0.007715924  | hsa-miR-128-1-5p  | 139.4550333 | -0.529293812 | 0.166772032 | -3.173798428 | 0.0015934497 | 0.000534977  |
| hsa-miR-769-5p    | 6194.072843 | 0.256611442   | 0.083132451 | 3.086850427   | 0.002022894 | 0.007773251  | hsa-miR-769-5p    | 6194.072843 | 0.08198073   | 0.083293043 | 0.983972608  | 0.325128981  | 0.504241953  |
| hsa-miR-25-3p     | 25865.03325 | 0.257492705   | 0.083830302 | 3.071594631   | 0.002129187 | 0.008140375  | hsa-miR-25-3p     | 25865.03325 | -0.450012789 | 0.083913272 | -5.362832101 | 8.19E-08     | 6.92E-07     |

|                   |             |               |             |              |             |             |                    |             |               |             |              |             |              |
|-------------------|-------------|---------------|-------------|--------------|-------------|-------------|--------------------|-------------|---------------|-------------|--------------|-------------|--------------|
| hsa-mir-191-3p    | 105.4746958 | -0.636480845  | 0.208756476 | -3.048915446 | 0.002296691 | 0.008736659 | hsa-mir-191-3p     | 105.4746958 | -0.636519756  | 0.209451489 | -1.735579715 | 0.082638175 | 0.183900659  |
| hsa-mir-135b-3p   | 69.40746251 | -0.650571053  | 0.214055095 | -3.039770649 | 0.002378157 | 0.008976192 | hsa-mir-135b-3p    | 69.40746251 | -0.5207776252 | 0.216415127 | -2.33196467  | 0.020168601 | 0.056985464  |
| hsa-mir-16-5p     | 138459.2851 | 0.274302564   | 0.090302661 | 3.036999191  | 0.002899462 | 0.008999197 | hsa-mir-16-5p      | 138459.2851 | -0.230270149  | 0.090931395 | -2.548473303 | 0.010819557 | 0.03097621   |
| hsa-mir-7-5p      | 18.42827707 | -0.953506717  | 0.31417877  | -3.034917719 | 0.002406013 | 0.009016594 | hsa-mir-7-5p       | 18.42827707 | -2.553059625  | 0.375492517 | -6.799165122 | 1.05E-11    | 1.20E-10     |
| hsa-mir-425-3p    | 133.8049087 | -0.572705014  | 0.189502961 | -3.022142831 | 0.002509921 | 0.009359656 | hsa-mir-425-3p     | 133.8049087 | 0.266907702   | 0.186673722 | 1.429808652  | 0.152771945 | 0.293095806  |
| hsa-mir-28-5p     | 5339.105235 | 0.198904381   | 0.066021301 | 3.012730431  | 0.002589088 | 0.009607547 | hsa-mir-28-5p      | 5339.105235 | -0.107722261  | 0.066324265 | -1.624180981 | 0.104337189 | 0.218517508  |
| hsa-mir-873-3p    | 55.76390159 | -0.7428931577 | 0.246769078 | -3.010229938 | 0.002614503 | 0.009639759 | hsa-mir-873-3p     | 55.76390159 | -0.651531624  | 0.226888591 | -2.607288395 | 0.009126226 | 0.028708879  |
| hsa-mir-331-3p    | 298.7885467 | 0.361759751   | 0.12032006  | 3.006645373  | 0.002641477 | 0.009706788 | hsa-mir-331-3p     | 298.7885467 | -0.068487726  | 0.123618434 | -0.556979314 | 0.577570218 | 0.726166381  |
| hsa-let-7d-3p     | 1160.303464 | -0.4865295    | 0.162506764 | -2.993912288 | 0.002754251 | 0.010023885 | hsa-let-7d-3p      | 1160.303464 | 0.560162671   | 0.161956104 | 3.458731446  | 0.000542726 | 0.002409702  |
| hsa-mir-548f-5p   | 123.9658804 | -0.407202163  | 0.136009669 | -2.993920689 | 0.002758433 | 0.010023885 | hsa-mir-548f-5p    | 123.9658804 | 0.570504678   | 0.139785093 | -3.040335175 | 0.002363315 | 0.008743655  |
| hsa-mir-99a-3p    | 97.60580109 | 0.446760383   | 0.149533102 | 2.997702241  | 0.002810537 | 0.010180862 | hsa-mir-99a-3p     | 97.60580109 | 0.570504678   | 0.151767939 | 3.769059266  | 0.000170553 | 0.00086052   |
| hsa-mir-199a-3p   | 110.0167091 | 0.807633471   | 0.271053726 | 2.979606602  | 0.002868188 | 0.01040402  | hsa-mir-199a-3p    | 110.0167091 | 1.404473506   | 0.270265988 | 5.19663431   | 2.03E-07    | 1.55E-06     |
| hsa-mir-548l      | 22.2144103  | -0.78735264   | 0.265614522 | -2.964426804 | 0.003034039 | 0.010885153 | hsa-mir-548l       | 22.2144103  | -1.341997684  | 0.290364424 | -4.62177034  | 3.80E-06    | 2.40E-05     |
| hsa-mir-148a-5p   | 59.40949185 | -0.538022584  | 0.181668009 | -2.961570312 | 0.003060746 | 0.010929173 | hsa-mir-148a-5p    | 59.40949185 | -1.776623795  | 0.211311556 | -8.407603562 | 4.18E-17    | 8.56E-16     |
| hsa-mir-100-3p    | 12138.65102 | 0.312396833   | 0.105625159 | 2.957598693  | 0.003100455 | 0.010189897 | hsa-mir-100-3p     | 12138.65102 | -0.131798995  | 0.105723265 | -1.246641361 | 0.212529029 | 0.377020674  |
| hsa-mir-15b-3p    | 130.0312774 | 0.399217784   | 0.135666607 | 2.942650238  | 0.003254158 | 0.011511205 | hsa-mir-15b-3p     | 130.0312774 | -0.382438731  | 0.145525833 | -2.627978315 | 0.008589399 | 0.027353308  |
| hsa-mir-219a-1-3p | 15.15411821 | -1.253321252  | 0.426437431 | -2.939050753 | 0.003292192 | 0.011537912 | hsa-mir-219a-1-3p  | 15.15411821 | -1.510953617  | 0.436576435 | -3.46091428  | 0.000538344 | 0.002409985  |
| hsa-mir-432b      | 36.56887337 | -0.792086642  | 0.269376687 | -2.940442437 | 0.003277439 | 0.011537912 | hsa-mir-432b       | 36.56887337 | -1.4171601457 | 0.286165796 | -4.95377671  | 7.28E-07    | 5.34E-06     |
| hsa-mir-4485-3p   | 76.52538735 | -0.686894387  | 0.234431102 | -2.930044606 | 0.003389096 | 0.011822792 | hsa-mir-4485-3p    | 76.52538735 | 1.508076261   | 0.21731639  | 6.999542204  | 3.93E-12    | 4.85E-11     |
| hsa-mir-7-1-3p    | 54.77157069 | -0.589814343  | 0.203846101 | -2.893429601 | 0.003810597 | 0.013323221 | hsa-mir-7-1-3p     | 54.77157069 | -0.624251542  | 0.209616932 | -2.978058762 | 0.002900804 | 0.010508663  |
| hsa-mir-3691-5p   | 11.53805302 | -1.118665003  | 0.386909066 | -2.891282177 | 0.003836735 | 0.013323217 | hsa-mir-3691-5p    | 11.53805302 | -1.20426627   | 0.396286434 | -2.827315118 | 0.006494011 | 0.01613826   |
| hsa-mir-181c-5p   | 6081.821793 | 0.340758944   | 0.118238813 | 2.881955055  | 0.003952161 | 0.013599027 | hsa-mir-181c-5p    | 6081.821793 | 0.01781955    | 0.118382435 | 0.150525283  | 0.880350205 | 0.938315651  |
| hsa-mir-479b-3p   | 1.698933296 | -1.50490697   | 0.352506605 | -2.853502638 | 0.004590054 | 0.014775733 | hsa-mir-479b-3p    | 1.698933296 | -1.154319769  | 0.526803813 | -2.191175806 | 0.028433714 | 0.075416927  |
| hsa-mir-3687      | 15.52657048 | 0.086674075   | 0.382382817 | 2.835175557  | 0.004800051 | 0.015617653 | hsa-mir-3687       | 15.52657048 | 1.968419069   | 0.376655655 | 5.2260044119 | 1.73E-07    | 1.35E-06     |
| hsa-mir-423-5p    | 16828.66209 | -0.549344645  | 0.194374425 | -2.826218752 | 0.004710109 | 0.015999023 | hsa-mir-423-5p     | 16828.66209 | -0.259894563  | 0.194378353 | -1.337050077 | 0.181204659 | 0.336473021  |
| hsa-mir-3605-5p   | 136.11569   | -0.570363692  | 0.201996933 | -2.823625503 | 0.004748383 | 0.016046991 | hsa-mir-3605-5p    | 136.11569   | -0.044573399  | 0.201141    | -0.22160275  | 0.824623141 | 0.908988878  |
| hsa-mir-100-5p    | 154309.576  | 0.28837399    | 0.103041155 | 2.793780008  | 0.005120933 | 0.017449381 | hsa-mir-100-5p     | 154309.576  | -0.432787824  | 0.103052438 | -4.19965438  | 2.67E-05    | 0.000157334  |
| hsa-mir-1277-5p   | 107.5346876 | 0.722638942   | 0.25865993  | 2.798780008  | 0.005205991 | 0.017449381 | hsa-mir-1277-5p    | 107.5346876 | 0.331568051   | 0.26179618  | 1.266512179  | 0.205329772 | 0.366761455  |
| hsa-mir-24-3p     | 1956.88447  | 0.370107916   | 0.132634418 | 2.790436464  | 0.005263703 | 0.017553406 | hsa-mir-24-3p      | 1956.88447  | 0.866919652   | 0.132567805 | 6.559810295  | 5.39E-11    | 5.98E-10     |
| hsa-mir-1468-5p   | 113.1244111 | -0.3949454781 | 0.142766666 | -2.766372507 | 0.005668374 | 0.018819998 | hsa-mir-1468-5p    | 113.1244111 | -0.4374556    | 0.146929314 | -2.977320097 | 0.002907802 | 0.010508663  |
| hsa-mir-24-2-5p   | 1698.186739 | -0.235633365  | 0.085661069 | -2.750763777 | 0.00594565  | 0.019654398 | hsa-mir-24-2-5p    | 1698.186739 | 0.84224045    | 0.084904605 | 9.919844119  | 3.41E-23    | 9.47E-22     |
| hsa-mir-4767      | 34.25205141 | 0.607951199   | 0.221444967 | 2.745382775  | 0.006044036 | 0.019892761 | hsa-mir-4767       | 34.25205141 | 0.385924447   | 0.230726092 | 1.672686622  | 0.094389004 | 0.202597393  |
| hsa-mir-3174      | 13.82454725 | -0.981210617  | 0.352985836 | -2.731002782 | 0.006314194 | 0.020691969 | hsa-mir-3174       | 13.82454725 | -0.540850095  | 0.357636738 | -1.512288973 | 0.130460365 | 0.259252439  |
| hsa-mir-30a-3p    | 11681.77647 | -0.286305033  | 0.104974728 | -2.727371026 | 0.006384121 | 0.020830946 | hsa-mir-30a-3p     | 11681.77647 | -0.071675475  | 0.104995367 | -0.682653699 | 0.494825694 | 0.653722717  |
| hsa-mir-877-5p    | 356.3578546 | -0.378826669  | 0.139263306 | -2.720218845 | 0.006523872 | 0.021195585 | hsa-mir-877-5p     | 356.3578546 | -0.850938668  | 0.142285428 | -5.980504673 | 2.22E-09    | 2.11E-08     |
| hsa-mir-513c-5p   | 9.952830557 | -0.966548276  | 0.355881308 | -2.71592875  | 0.006609014 | 0.021380443 | hsa-mir-513c-5p    | 9.952830557 | -0.610631243  | 0.356331213 | -1.713661957 | 0.086590828 | 1.188532414  |
| hsa-mir-643       | 8.530278613 | -1.150844012  | 0.424676394 | -2.709931674 | 0.006729707 | 0.021678248 | hsa-mir-643        | 8.530278613 | -1.26124437   | 0.437118753 | -2.885358638 | 0.003909068 | 0.013745798  |
| hsa-mir-30b-5p    | 29167.15588 | -0.307661094  | 0.114654389 | -2.683378253 | 0.007288251 | 0.023337799 | hsa-mir-30b-5p/30c | 29167.15588 | -0.083637551  | 0.114661487 | -0.729430196 | 0.465738553 | 0.633763319  |
| hsa-mir-221-5p    | 1697.99887  | 0.233725019   | 0.087967195 | 2.658956602  | 0.007884959 | 0.025185292 | hsa-mir-221-5p     | 1697.99887  | -0.084522151  | 0.088680503 | -0.935221368 | 0.340477922 | 0.515694631  |
| hsa-mir-3909      | 80.77554104 | -0.611082457  | 0.230734629 | -2.648412081 | 0.008080673 | 0.025721692 | hsa-mir-3909       | 80.77554104 | 0.816784284   | 0.222317448 | 3.673954926  | 0.000238825 | 0.0011173394 |
| hsa-mir-375       | 4.92231827  | 1.44004278    | 0.54538601  | 2.640410192  | 0.008280574 | 0.026227591 | hsa-mir-375        | 4.92231827  | -0.056360239  | 0.553988141 | -0.101735462 | 0.918966654 | 0.964914986  |
| hsa-mir-551b-3p   | 13.88788019 | 1.44388741    | 0.547796416 | 2.635810253  | 0.008393665 | 0.026365165 | hsa-mir-551b-3p    | 13.88788019 | 0.508706986   | 0.549842748 | 0.925186152  | 0.354869086 | 0.532303628  |
| hsa-mir-615-5p    | 13.6683925  | -0.968925457  | 0.367830319 | -2.615995758 | 0.008290067 | 0.026365165 | hsa-mir-615-5p     | 13.6683925  | -0.421938816  | 0.363617733 | -1.160391163 | 0.242885951 | 0.420826448  |
| hsa-mir-449b-5p   | 10.6150042  | 1.005958447   | 0.384673469 | 2.615995703  | 0.008920211 | 0.027903305 | hsa-mir-449b-5p    | 10.6150042  | 1.088349118   | 0.389797492 | 2.792088561  | 0.005236902 | 0.017848611  |
| hsa-let-7e-5p     | 18157.14337 | 0.328293384   | 0.126179233 | 2.601802033  | 0.009273537 | 0.028889166 | hsa-let-7e-5p      | 18157.14337 | 0.263475647   | 0.126206451 | 2.087655935  | 0.036828882 | 0.092309812  |
| hsa-mir-3143      | 1.617940607 | -1.436206704  | 0.5558783   | -2.58367111  | 0.009775496 | 0.030328077 | hsa-mir-3143       | 1.617940607 | -1.34470995   | 0.55336973  | -2.430038864 | 0.015097204 | 0.044099727  |
| hsa-mir-92a-1-5p  | 680.6789931 | -0.606962898  | 0.235282242 | -2.573812038 | 0.010056408 | 0.031078682 | hsa-mir-92a-1-5p   | 680.6789931 | -0.00209673   | 0.235612381 | -0.008899065 | 0.992899667 | 0.99659781   |
| hsa-mir-146b-3p   | 52.13776853 | -0.653912957  | 0.258996254 | -2.545673713 | 0.010906749 | 0.033562523 | hsa-mir-146b-3p    | 52.13776853 | 0.639060456   | 0.249250988 | 2.5638667293 | 0.010305131 | 0.03217876   |
| hsa-mir-545-3p    | 2.366583733 | 1.416651273   | 0.558346946 | 2.537224     | 0.011173543 | 0.034244423 | hsa-mir-545-3p     | 2.366583733 | 1.0330606136  | 0.556785494 | 1.8554000595 | 0.063539042 | 0.148704325  |

|                   |              |               |             |              |              |              |                      |              |              |              |              |              |             |
|-------------------|--------------|---------------|-------------|--------------|--------------|--------------|----------------------|--------------|--------------|--------------|--------------|--------------|-------------|
| hsa-miR-27a-3p    | 252950.896   | 0.395719761   | 0.156101019 | 2.535023559  | 0.011243976  | 0.034321331  | hsa-miR-27a-3p/27b   | 252950.896   | 0.344145738  | 0.156102486  | 2.202414074  | 0.027481187  | 0.073630629 |
| hsa-miR-27b-3p    | 207880.9545  | 0.288557069   | 0.114040931 | 2.530293863  | 0.011396703  | 0.0344552107 | hsa-miR-27a-5p/7c-5p | 207880.9545  | 0.166236583  | 0.114043985  | 1.457653234  | 0.1449936148 | 0.282013779 |
| hsa-miR-3150a-3p  | 1.733450396  | -1.377462515  | 0.544482133 | -2.529858063 | 0.011410868  | 0.034552107  | hsa-miR-3150a-3p     | 1.733450396  | -0.462244813 | 0.549345854  | -0.841445895 | 0.400098184  | 0.574536966 |
| hsa-miR-629-3p    | 1.737699193  | -1.295180802  | 0.515897459 | -2.510539214 | 0.0120504693 | 0.036356186  | hsa-miR-629-3p       | 1.737699193  | -0.882621745 | 0.516361875  | -1.709308505 | 0.087393819  | 0.189678763 |
| hsa-miR-20a-3p    | 76.11273173  | 0.451247575   | 0.180489156 | 2.500136761  | 0.012414537  | 0.037292987  | hsa-miR-20a-3p       | 76.11273173  | 0.179899745  | 0.186626278  | 0.963769232  | 0.3351161636 | 0.511699104 |
| hsa-miR-3154-3p   | 448.6107984  | -0.307518044  | 0.123322356 | -2.489573983 | 0.01278963   | 0.038267785  | hsa-miR-3154-3p      | 448.6107984  | 0.751155569  | 0.121605139  | 6.177000572  | 6.53E-10     | 6.99E-09    |
| hsa-miR-3148-5p   | 1.927170918  | -1.392231261  | 0.55995293  | -2.486148151 | 0.012913419  | 0.038466057  | hsa-miR-3148-5p      | 1.927170918  | -1.519051845 | 0.558408354  | -2.720324356 | 0.006521791  | 0.021565339 |
| hsa-let-7f-5p     | 331565.7771  | 0.289221971   | 0.116741817 | 2.477449621  | 0.0133232509 | 0.039267304  | hsa-let-7f-5p        | 331565.7771  | 0.308786866  | 0.116743124  | 2.645011159  | 0.008168822  | 0.026528814 |
| hsa-miR-181d-5p   | 2081.754142  | 0.145947757   | 0.058940459 | 2.476189709  | 0.01332793   | 0.039292504  | hsa-miR-181d-5p      | 2081.754142  | -0.284652439 | 0.05999397   | -4.774424995 | 2.09E-06     | 1.40E-05    |
| hsa-miR-548b-5p   | 6.082262083  | -1.151707228  | 0.465603138 | -2.473358139 | 0.013376633  | 0.039295585  | hsa-miR-548b-5p      | 6.082262083  | -1.445654594 | 0.481919887  | -2.999781982 | 0.002701729  | 0.009902092 |
| hsa-miR-548b-3p   | 2.048537727  | -1.366599389  | 0.52525133  | -2.473152902 | 0.013392683  | 0.039295585  | hsa-miR-548b-3p      | 2.048537727  | -0.951045857 | 0.522886435  | -1.720146846 | 0.085405752  | 0.187898432 |
| hsa-miR-138-1-3p  | 843.2869187  | 0.332678927   | 0.134956765 | 2.465077812  | 0.01369835   | 0.040037262  | hsa-miR-138-1-3p     | 843.2869187  | 0.259871028  | 0.135508698  | 1.917744253  | 0.055143448  | 0.132242157 |
| hsa-miR-628-5p    | 98.68992006  | -0.411885798  | 0.167707907 | -2.455971249 | 0.01405044   | 0.040908396  | hsa-miR-628-5p       | 98.68992006  | -0.213334436 | 0.169325995  | -1.25990363  | 0.207704129  | 0.370151625 |
| hsa-miR-454-5p    | 321.3181582  | -0.310736045  | 0.126816489 | -2.450281088 | 0.014274473  | 0.041401441  | hsa-miR-454-5p       | 321.3181582  | -0.817693205 | 0.130620778  | -6.260054606 | 3.85E-10     | 3.93E-09    |
| hsa-miR-7704      | 220.9320395  | -0.371073584  | 0.152178702 | -2.438406819 | 0.014752161  | 0.042623612  | hsa-miR-7704         | 220.9320395  | -0.65288784  | 0.155448135  | -4.200034847 | 2.67E-05     | 0.000157334 |
| hsa-miR-188-5p    | 59.9089376   | 0.491888169   | 0.204199264 | 2.408638358  | 0.016002278  | 0.04605979   | hsa-miR-188-5p       | 59.9089376   | -0.418087873 | 0.218817519  | -1.910669106 | 0.056047117  | 0.133584694 |
| hsa-miR-26a-2-3p  | 73.86737115  | 0.549590869   | 0.230902418 | 2.380186722  | 0.017303867  | 0.049430293  | hsa-miR-26a-2-3p     | 73.86737115  | 1.4499015468 | 0.227251873  | 6.376253143  | 1.81E-10     | 1.93E-09    |
| hsa-miR-589-5p    | 1114.408313  | -0.22456492   | 0.09433457  | -2.380515643 | 0.017288427  | 0.049472066  | hsa-miR-589-5p       | 1114.408313  | -0.596814989 | 0.094333194  | -6.326670004 | 2.51E-10     | 2.63E-09    |
| hsa-miR-3130-3p   | 2.605501038  | -1.324190746  | 0.556737154 | -2.378484599 | 0.017383963  | 0.049472066  | hsa-miR-3130-3p      | 2.605501038  | -0.197730022 | 0.552825543  | -0.357671646 | 0.720589054  | 0.829478067 |
| hsa-miR-1278      | 23.3621895   | -0.809445369  | 0.345275347 | -2.344347421 | 0.019060407  | 0.054040181  | hsa-miR-1278         | 23.3621895   | -0.5646131   | 0.347130507  | -1.626515355 | 0.10384007   | 0.218064146 |
| hsa-miR-513b-5p   | 5.949858815  | -1.072321192  | 0.460344461 | -2.329388712 | 0.019838483  | 0.056036311  | hsa-miR-513b-5p      | 5.949858815  | -1.322473077 | 0.476098569  | -2.777729577 | 0.005474015  | 0.018573406 |
| hsa-miR-769-3p    | 20.27030696  | 0.627774647   | 0.221605056 | 2.323536601  | 0.020143048  | 0.056701115  | hsa-miR-769-3p       | 20.27030696  | 0.502119189  | 0.279904662  | 1.793893626  | 0.072830149  | 0.16692928  |
| hsa-miR-96-5p     | 478.0871051  | 0.489477429   | 0.121245829 | 2.3038601    | 0.021340798  | 0.059524026  | hsa-miR-96-5p        | 478.0871051  | 0.520566649  | 0.212873146  | 2.445430334  | 0.01446794   | 0.042581777 |
| hsa-miR-5680      | 4.891213089  | 1.204150427   | 0.526453001 | 2.287286904  | 0.022179082  | 0.061954416  | hsa-miR-5680         | 4.891213089  | 0.557138694  | 0.534730031  | 1.041906499  | 0.297455031  | 0.476541359 |
| hsa-miR-3942-5p   | 9.080076365  | -0.857159279  | 0.375635168 | -2.28189305  | 0.022495655  | 0.062607394  | hsa-miR-3942-5p      | 9.080076365  | -1.285471611 | 0.401040517  | -3.205340998 | 0.001349026  | 0.000543051 |
| hsa-miR-702a-5p   | 1.8110729203 | 0.426283702   | 0.188233362 | 2.264648193  | 0.023534958  | 0.06255805   | hsa-miR-702a-5p      | 1.8110729203 | 0.522998487  | 0.188837042  | 2.765975717  | 0.008612936  | 0.026861961 |
| hsa-miR-3622a-5p  | 1481.916807  | -1.165517623  | 0.175828341 | -2.250772371 | 0.024999577  | 0.06411564   | hsa-miR-3622a-5p     | 1481.916807  | -1.344421948 | 0.510171382  | -2.635255914 | 0.000407882  | 0.026864663 |
| hsa-miR-2467-5p   | 69.50030923  | -0.517416129  | 0.231335898 | -2.23664435  | 0.025309594  | 0.0649426152 | hsa-miR-2467-5p      | 69.50030923  | 0.505336649  | 0.225562083  | 2.240609511  | 0.02505138   | 0.068059169 |
| hsa-miR-361-3p    | 488.438721   | -0.330855667  | 0.148000987 | -2.23549635  | 0.025384781  | 0.069426152  | hsa-miR-361-3p       | 488.438721   | -0.157389931 | 0.148432402  | -1.060343483 | 0.288988364  | 0.469757236 |
| hsa-miR-503-5p    | 128.7431246  | 1.050499761   | 0.469890413 | 2.235199023  | 0.025404286  | 0.069426152  | hsa-miR-503-5p       | 128.7431246  | -0.105975309 | 0.471346011  | -0.224835486 | 0.822107259  | 0.908985878 |
| hsa-miR-3142      | 1.159037547  | -1.159791315  | 0.520120183 | -2.22985546  | 0.025757234  | 0.070137503  | hsa-miR-3142         | 1.159037547  | 0.590237256  | 0.522898158  | -1.128780523 | 0.258990431  | 0.435574816 |
| hsa-miR-2116-3p   | 3.774773959  | -1.223155022  | 0.559096194 | -2.18773627  | 0.028688818  | 0.07769809   | hsa-miR-2116-3p      | 3.774773959  | -1.68888722  | 0.559699266  | -3.017490506 | 0.00254877   | 0.009385756 |
| hsa-miR-365a-5p   | 4.359880612  | -1.12090887   | 0.512850725 | -2.185643531 | 0.028841695  | 0.07769809   | hsa-miR-365a-5p      | 4.359880612  | -0.197856936 | 0.502873773  | -0.393452486 | 0.693985311  | 0.81700998  |
| hsa-miR-373-3p    | 3.096805258  | -1.190690542  | 0.544462138 | -2.186916885 | 0.028748592  | 0.07769809   | hsa-miR-373-3p       | 3.096805258  | -0.610343727 | 0.542277481  | -1.12551922  | 0.260369077  | 0.436005977 |
| hsa-miR-1254      | 13.68090434  | -0.730276939  | 0.33559256  | -2.176082033 | 0.029549127  | 0.079041305  | hsa-miR-1254         | 13.68090434  | -1.793795827 | 0.378621379  | -4.73770349  | 2.16E-06     | 1.44E-05    |
| hsa-miR-548f-3p   | 18.33211525  | -0.683388963  | 0.313891299 | -2.177151663 | 0.029469253  | 0.079041305  | hsa-miR-548f-3p      | 18.33211525  | 0.728985151  | 0.290257419  | 2.511512553  | 0.012021501  | 0.036204288 |
| hsa-miR-328-3p    | 45.57919234  | -0.408009697  | 0.188930043 | -2.159580817 | 0.030805135  | 0.08211087   | hsa-miR-328-3p       | 45.57919234  | 0.111024607  | 0.18636216   | 0.595746512  | 0.551344581  | 0.702286458 |
| hsa-miR-642a-3p   | 8.830689407  | -1.057314236  | 0.490952442 | -2.148844225 | 0.031271671  | 0.083764301  | hsa-miR-642a-3p      | 8.830689407  | 1.105504312  | 0.463737888  | 2.383899053  | 0.017130301  | 0.049297199 |
| hsa-miR-3662      | 13.48094745  | -0.74244437   | 0.345508698 | -2.148844225 | 0.03164675   | 0.083764301  | hsa-miR-3662         | 13.48094745  | -3.008512402 | 0.437497653  | -6.87663661  | 6.13E-12     | 7.21E-11    |
| hsa-miR-1270      | 12.99894482  | -0.672787231  | 0.314262739 | -2.140841447 | 0.032868689  | 0.085160361  | hsa-miR-1270         | 12.99894482  | -0.793357577 | 0.329424636  | -2.420455214 | 0.015501089  | 0.04510991  |
| hsa-miR-4286      | 26.47174004  | 0.650862213   | 0.304265739 | 2.139124226  | 0.032425609  | 0.085229812  | hsa-miR-4286         | 26.47174004  | -0.15057012  | 0.315458199  | -0.47730609  | 0.633144175  | 0.777176973 |
| hsa-miR-913-3p    | 61.9783026   | -0.435213621  | 0.204807731 | -2.124986289 | 0.03387757   | 0.087979004  | hsa-miR-913-3p       | 61.9783026   | -0.824644026 | 0.214387164  | -3.846517726 | 0.000119808  | 0.000612442 |
| hsa-miR-3117-3p   | 93.9756117   | 0.395958632   | 0.186336216 | 2.12177497   | 0.03348567   | 0.088337504  | hsa-miR-3117-3p      | 93.9756117   | -0.73394071  | 0.216720715  | -8.352066902 | 6.71E-17     | 3.4E-15     |
| hsa-miR-3913-3p   | 0.954850888  | -1.035955807  | 0.489806254 | -2.115038097 | 0.03442664   | 0.089856743  | hsa-miR-3913-3p      | 0.954850888  | -1.810061912 | 0.488895181  | -1.501230309 | 0.133297883  | 0.262874251 |
| hsa-miR-125b-2-3p | 2897.175493  | 0.216769908   | 0.102672798 | 2.111118157  | 0.034762157  | 0.090019702  | hsa-miR-125b-2-3p    | 2897.175493  | 0.820273897  | 0.102566966  | 7.997447202  | 1.27E-15     | 2.19E-14    |
| hsa-miR-28-3p     | 40886.75794  | -0.324313321  | 0.154522398 | -2.098836968 | 0.038531275  | 0.092574317  | hsa-miR-28-3p        | 40886.75794  | -0.759203074 | 0.154544563  | -4.912518821 | 8.99E-07     | 6.41E-06    |
| hsa-miR-1307-5p   | 6472.882848  | 0.802816932   | 0.382688842 | 2.099643824  | 0.036007282  | 0.092712482  | hsa-miR-1307-5p      | 6472.882848  | -0.101796164 | 0.382914101  | -0.265845954 | 0.79035785   | 0.888469534 |
| hsa-miR-1243      | 8.000348804  | -0.806583684  | 0.391550332 | -2.059974461 | 0.039400926  | 0.10076535   | hsa-miR-1243         | 8.000348804  | -0.47480836  | 0.392744934  | -1.211494583 | 0.225750509  | 0.392344433 |
| hsa-miR-628-3p    | 22.93721064  | -0.6532954163 | 0.307072093 | -2.061255901 | 0.039297833  | 0.10076535   | hsa-miR-628-3p       | 22.93721064  | -0.811872721 | 0.317326335  | -2.558478862 | 0.010513121  | 0.032415457 |
| hsa-miR-4741      | 14.61791909  | -0.692664322  | 0.340024228 | -2.037102845 | 0.041639737  | 0.106132259  | hsa-miR-4741         | 14.61791909  | -1.431510025 | 0.3688707999 | -3.88250331  | 0.000103387  | 0.000539137 |



|                  |             |              |             |              |              |              |                  |             |               |             |              |             |             |
|------------------|-------------|--------------|-------------|--------------|--------------|--------------|------------------|-------------|---------------|-------------|--------------|-------------|-------------|
| hsa-miR-3615     | 955.3066382 | -0.264471453 | 0.131616308 | -2.009412481 | 0.044493408  | 0.1130252    | hsa-miR-3615     | 955.3066382 | -0.6192724318 | 0.132602648 | -4.670150449 | 3.01E-06    | 1.95E-05    |
| hsa-miR-365b-3p  | 146.4556408 | -0.361793322 | 0.180213397 | -2.007580603 | 0.046867878  | 0.113139543  | hsa-miR-365b-3p  | 146.4556408 | 0.706370631   | 0.17855304  | 1.518582221  | 0.086189003 | 0.188532414 |
| hsa-miR-212-3p   | 32.41325797 | 0.436609814  | 0.218599899 | 1.997304823  | 0.025792708  | 0.115548681  | hsa-miR-212-3p   | 32.41325797 | 0.379983278   | 0.219050947 | 3.560799131  | 0.000369812 | 0.001730989 |
| hsa-miR-3651     | 42.03552082 | 0.540447436  | 0.272264456 | 1.985090147  | 0.047143454  | 0.118553437  | hsa-miR-3651     | 42.03552082 | 1.895016023   | 0.262248951 | 7.226190495  | 4.97E-13    | 7.03E-12    |
| hsa-miR-196b-3p  | 5.499474263 | 1.00210911   | 0.505731707 | 1.981503426  | 0.047534846  | 0.119151914  | hsa-miR-196b-3p  | 5.499474263 | 0.445631109   | 0.515739717 | 0.864062034  | 0.387553814 | 0.560762222 |
| hsa-miR-424-3p   | 951.2518679 | 0.322705017  | 0.164052309 | 0.322705017  | 0.164052309  | 0.12285207   | hsa-miR-424-3p   | 951.2518679 | 0.1619534467  | 0.165379042 | -3.599878559 | 0.000318366 | 0.001517609 |
| hsa-miR-5706     | 6.458786356 | 0.966573891  | 0.491874664 | 1.965005808  | 0.049913244  | 0.123045479  | hsa-miR-5706     | 6.458786356 | 0.1619534467  | 0.479370085 | 0.337846859  | 0.735478799 | 0.889368135 |
| hsa-miR-33a-3p   | 14.89014923 | 0.576766806  | 0.294205662 | 1.95291777   | 0.0517339872 | 0.123095982  | hsa-miR-33a-3p   | 14.89014923 | 0.653551908   | 0.283935845 | 2.301759076  | 0.021348763 | 0.059884435 |
| hsa-miR-3116     | 22.16619526 | -0.588867359 | 0.300712175 | -1.958242495 | 0.050201565  | 0.1241919453 | hsa-miR-3116     | 22.16619526 | 0.653551908   | 0.283935845 | 2.301759076  | 0.021348763 | 0.059884435 |
| hsa-miR-128-2-5p | 2.806849631 | -1.091340495 | 0.558587996 | -1.953785288 | 0.050726615  | 0.125081388  | hsa-miR-128-2-5p | 2.806849631 | -1.33581209   | 0.559414041 | -2.387965106 | 0.01694195  | 0.048936414 |
| hsa-miR-34a-5p   | 15.43455167 | 0.613883386  | 0.314399644 | 1.9450938081 | 0.051059058  | 0.125492556  | hsa-miR-34a-5p   | 15.43455167 | 0.66908638    | 0.320013652 | 2.184551741  | 0.02892173  | 0.076176895 |
| hsa-miR-1246     | 8.530804519 | 0.815801778  | 0.419372451 | 1.95291777   | 0.0517339872 | 0.126754315  | hsa-miR-1246     | 8.530804519 | 0.306122423   | 0.434849035 | 0.70397402   | 0.481448953 | 0.643866467 |
| hsa-miR-199a-5p  | 2.478167318 | -1.031303685 | 0.531252076 | -1.941269938 | 0.052225544  | 0.127531409  | hsa-miR-199a-5p  | 2.478167318 | -0.941068887  | 0.529293598 | -1.777970848 | 0.075408643 | 0.171323145 |
| hsa-miR-5009-5p  | 1.048873928 | -0.812225885 | 0.419111296 | -1.938030634 | 0.052619485  | 0.128080226  | hsa-miR-5009-5p  | 1.048873928 | -0.79487747   | 0.415772957 | -1.911806566 | 0.055901009 | 0.133584694 |
| hsa-miR-452-5p   | 135.9334047 | -0.260791216 | 0.135446805 | -1.925414308 | 0.054177547  | 0.13145001   | hsa-miR-452-5p   | 135.9334047 | -0.035931245  | 0.136670518 | -0.26290414  | 0.792624466 | 0.884869554 |
| hsa-miR-125a-5p  | 10726.03722 | -0.300944509 | 0.1565044   | -1.922914047 | 0.054490845  | 0.131787763  | hsa-miR-125a-5p  | 10726.03722 | 0.231248232   | 0.156490001 | 1.477718896  | 0.139483034 | 0.272993244 |
| hsa-miR-487b-3p  | 1.047336545 | -0.790147661 | 0.414980889 | -1.90405795  | 0.056902637  | 0.137182473  | hsa-miR-487b-3p  | 1.047336545 | -0.773317645  | 0.411725621 | -1.878235419 | 0.060348967 | 0.142526283 |
| hsa-miR-92b-5p   | 2.953839528 | -0.897093328 | 0.475058678 | -1.88838823  | 0.05897385   | 0.139077529  | hsa-miR-92b-5p   | 2.953839528 | -0.556112918  | 0.559786795 | -0.993437007 | 0.320497034 | 0.500547021 |
| hsa-miR-3128     | 5.885921198 | -0.975722809 | 0.525834684 | -1.855568962 | 0.063515021  | 0.151674672  | hsa-miR-3128     | 5.885921198 | -0.172283701  | 0.467581049 | -1.768457408 | 0.712532198 | 0.500547021 |
| hsa-miR-217      | 0.928650186 | -0.975722809 | 0.525834684 | -1.855568962 | 0.063515021  | 0.151674672  | hsa-miR-217      | 0.928650186 | 1.195284558   | 0.518705645 | -2.304360034 | 0.021202442 | 0.059689482 |
| hsa-miR-181c-3p  | 1346.231697 | 0.232215519  | 0.126200701 | 1.84004936   | 0.065760991  | 0.156053511  | hsa-miR-181c-3p  | 1346.231697 | -0.237210306  | 0.126966456 | -1.868291152 | 0.061721499 | 0.144887024 |
| hsa-miR-188-3p   | 53.99109625 | -0.379919159 | 0.203153738 | -1.840572381 | 0.065684248  | 0.156053511  | hsa-miR-188-3p   | 53.99109625 | -0.65779245   | 0.212399621 | -3.096956794 | 0.001955184 | 0.00744695  |
| hsa-miR-130b-3p  | 5298.642866 | 0.258528266  | 0.141356276 | 1.828892237  | 0.067415154  | 0.158990644  | hsa-miR-130b-3p  | 5298.642866 | 0.465663402   | 0.141590792 | -3.28879857  | 0.001006159 | 0.004180673 |
| hsa-miR-675-5p   | 1.6594947   | 0.85251235   | 0.466162277 | 1.828892237  | 0.067415154  | 0.158990644  | hsa-miR-675-5p   | 1.6594947   | 0.333619475   | 0.460934857 | 0.764178854  | 0.442975184 | 0.61524541  |
| hsa-miR-4775     | 173.3221008 | -0.281166749 | 0.153964455 | -1.826179614 | 0.067823211  | 0.159447735  | hsa-miR-4775     | 173.3221008 | -0.641205576  | 0.158495282 | -4.04558148  | 5.22E-05    | 0.000289673 |
| hsa-miR-6783-3p  | 7.296836611 | 1.020379465  | 0.55959451  | 1.825540757  | 0.06822153   | 0.159887611  | hsa-miR-6783-3p  | 7.296836611 | 0.308340819   | 0.558911341 | 0.551681093  | 0.581166886 | 0.729038382 |
| hsa-miR-1296-5p  | 88.45370688 | 0.316493648  | 0.174129077 | 1.817557711  | 0.06913176   | 0.161520081  | hsa-miR-1296-5p  | 88.45370688 | 0.362326602   | 0.17693293  | 0.304718917  | 0.040577746 | 0.100410357 |
| hsa-miR-3607-3p  | 175.1927276 | -0.424838544 | 0.234847631 | -1.808956121 | 0.070451606  | 0.163145467  | hsa-miR-3607-3p  | 175.1927276 | 0.080149709   | 0.234395506 | 0.341942171  | 0.732394411 | 0.889336958 |
| hsa-miR-4511     | 14.56001284 | 0.332179992  | 0.093414823 | -1.808594122 | 0.070473669  | 0.163145467  | hsa-miR-4511     | 14.56001284 | -0.796144302  | 0.346137385 | -2.300081809 | 0.021444586 | 0.059394051 |
| hsa-miR-98-5p    | 12354.58381 | 0.169228033  | 0.093414823 | 1.811575801  | 0.070051767  | 0.163145467  | hsa-miR-98-5p    | 12354.58381 | 0.242697986   | 0.093453231 | 2.586999935  | 0.009404209 | 0.029463993 |
| hsa-miR-6509-5p  | 3.640600486 | -0.993285221 | 0.55118543  | -1.802089038 | 0.071531398  | 0.165027957  | hsa-miR-6509-5p  | 3.640600486 | 0.97811244    | 0.553125789 | -1.768336531 | 0.07700469  | 0.174439196 |
| hsa-miR-5109-5p  | 5.388170815 | -0.908661295 | 0.503012227 | -1.800873311 | 0.071722285  | 0.165027957  | hsa-miR-5109-5p  | 5.388170815 | -1.026663134  | 0.510827741 | -2.009803016 | 0.044452042 | 0.108956581 |
| hsa-miR-31-3p    | 35.71639421 | 0.48081317   | 0.267516381 | 1.79732235   | 0.07228446   | 0.165816171  | hsa-miR-31-3p    | 35.71639421 | 0.843339138   | 0.267608883 | 3.151386943  | 0.001624971 | 0.006323426 |
| hsa-miR-340-3p   | 156.905808  | 0.226097843  | 0.126453631 | 1.787990126  | 0.073777601  | 0.168730042  | hsa-miR-340-3p   | 156.905808  | 0.064578798   | 0.130331274 | 0.495497329  | 0.620249107 | 0.767660041 |
| hsa-miR-4781-3p  | 7.579049666 | -0.734496302 | 0.413132917 | -1.777869231 | 0.075425335  | 0.171978885  | hsa-miR-4781-3p  | 7.579049666 | -1.42972622   | 0.443907805 | -3.22077288  | 0.001278454 | 0.005200832 |
| hsa-miR-561-3p   | 11.93668014 | -0.567202782 | 0.320839832 | -1.767868965 | 0.077082812  | 0.175230297  | hsa-miR-561-3p   | 11.93668014 | -0.551292869  | 0.331760756 | -1.661717603 | 0.09656941  | 0.206265806 |
| hsa-miR-218-1-3p | 8.845666626 | 0.571124927  | 0.325725808 | 1.755709735  | 0.079137984  | 0.179363634  | hsa-miR-218-1-3p | 8.845666626 | 0.407700032   | 0.391112431 | 1.042412105  | 0.297220656 | 0.476541359 |
| hsa-miR-2682-3p  | 17.83884218 | 0.571124927  | 0.325725808 | 1.755709735  | 0.079137984  | 0.179363634  | hsa-miR-2682-3p  | 17.83884218 | 1.080423618   | 0.323475383 | 3.340048965  | 0.000837636 | 0.003556521 |
| hsa-le1-7b-3p    | 42.70735676 | -0.463665314 | 0.265099561 | -1.749051029 | 0.080282199  | 0.180873883  | hsa-le1-7b-3p    | 42.70735676 | 0.184999711   | 0.261746365 | 0.744986723  | 0.456279414 | 0.62637651  |
| hsa-miR-374a-3p  | 3344.464305 | 0.26665429   | 0.152604248 | 1.747358234  | 0.080575198  | 0.180993357  | hsa-miR-374a-3p  | 3344.464305 | 0.187543943   | 0.152729051 | 1.227951992  | 0.21946499  | 0.385801078 |
| hsa-miR-4762-5p  | 11.90362313 | -0.561963798 | 0.3231436   | -1.745352027 | 0.081245158  | 0.181992355  | hsa-miR-4762-5p  | 11.90362313 | -0.989055499  | 0.347633765 | -2.845107693 | 0.00443664  | 0.015000005 |
| hsa-miR-7845-5p  | 5.082890958 | 0.976605034  | 0.560554669 | 1.741898703  | 0.081526171  | 0.182051066  | hsa-miR-7845-5p  | 5.082890958 | 0.603670346   | 0.560578271 | 1.076870754  | 0.281538011 | 0.461508511 |
| hsa-miR-362-5p   | 15.36194683 | 0.538692031  | 0.311511069 | 1.729288695  | 0.083757748  | 0.186848163  | hsa-miR-362-5p   | 15.36194683 | 0.562452485   | 0.318566402 | 1.765573777  | 0.077467383 | 0.174578606 |
| hsa-miR-4796-5p  | 3.079444788 | -0.966115507 | 0.560297578 | -1.724246592 | 0.085455546  | 0.189291051  | hsa-miR-4796-5p  | 3.079444788 | -1.270044722  | 0.531390204 | -2.712440573 | 0.029010554 | 0.064010837 |
| hsa-miR-505-3p   | 356.525653  | -0.145434796 | 0.084966252 | -1.71175792  | 0.086941313  | 0.191879225  | hsa-miR-505-3p   | 356.525653  | -0.389240515  | 0.088340122 | -4.508036748 | 6.54E-06    | 4.07E-05    |
| hsa-miR-139-5p   | 63.32283454 | 0.518800508  | 0.303376433 | 1.710088869  | 0.087249441  | 0.191999496  | hsa-miR-139-5p   | 63.32283454 | 1.573195444   | 0.299701612 | 5.249205817  | 1.53E-07    | 1.20E-06    |
| hsa-miR-9-3p     | 1.704657484 | 0.951224024  | 0.558488516 | 1.703219665  | 0.088526668  | 0.194246413  | hsa-miR-9-3p     | 1.704657484 | -0.065895261  | 0.552311774 | -0.119306787 | 0.905032307 | 0.959327582 |
| hsa-miR-130b-5p  | 1343.534964 | -0.219423645 | 0.129308859 | -0.676895687 | 0.089716584  | 0.196287001  | hsa-miR-130b-5p  | 1343.534964 | -1.029225563  | 0.130578477 | -7.882104597 | 3.22E-15    | 5.21E-12    |
| hsa-miR-24-1-5p  | 9.763829568 | 0.677632509  | 0.403840104 | 1.677977303  | 0.093352506  | 0.203653738  | hsa-miR-24-1-5p  | 9.763829568 | 0.964269417   | 0.403301488 | 2.3739141071 | 0.017355304 | 0.04962683  |
| hsa-miR-6840-5p  | 5.55693362  | -0.913200455 | 0.546451793 | -1.6711455   | 0.094692942  | 0.20598436   | hsa-miR-6840-5p  | 5.55693362  | 0.522327705   | 0.540151447 | 0.967066777  | 0.333510652 | 0.51113876  |

|                  |             |              |              |              |              |                  |                |              |              |              |              |             |             |
|------------------|-------------|--------------|--------------|--------------|--------------|------------------|----------------|--------------|--------------|--------------|--------------|-------------|-------------|
| hsa-miR-330-3p   | 49.02063837 | 0.363720246  | 0.21830409   | 1.666117415  | 0.09569003   | 0.207556886      | hsa-miR-330-3p | 49.02063837  | 0.250173492  | 0.223953751  | 1.117076588  | 0.26396158  | 0.441071285 |
| hsa-miR-188-3p   | 8.386632285 | 0.760246649  | 0.460966086  | 0.909097117  | 0.214533021  | hsa-miR-188-3p   | 8.386632285    | 0.727172438  | 0.466012892  | 1.561700225  | 0.11835626   | 0.24293807  |             |
| hsa-miR-5489-5p  | 10.10746447 | 0.568887733  | 0.343871725  | 1.649263034  | 0.099838098  | hsa-miR-5489-5p  | 10.10746447    | -0.117062423 | 0.371310919  | -0.315726792 | 0.752585226  | 0.856131404 |             |
| hsa-miR-21-3p    | 163824.2291 | 0.356194739  | 0.21767391   | 1.64017018   | 0.100969788  | hsa-miR-21-3p    | 163824.2291    | 0.669746641  | 0.217167592  | 3.084008232  | 0.002042319  | 0.007703312 |             |
| hsa-miR-342-3p   | 175.3126285 | 0.350006603  | 0.21325459   | 1.6412616757 | 0.100749391  | hsa-miR-342-3p   | 175.3126285    | -0.241451532 | 0.216807105  | -1.113669831 | 0.265420856  | 0.44161029  |             |
| hsa-miR-5683     | 9.016310888 | -0.82966936  | 0.506591365  | -0.82966936  | 0.102444463  | hsa-miR-5683     | 9.016310888    | 0.589167048  | 0.495639902  | 0.143333889  | 0.156425131  | 0.235454452 |             |
| hsa-miR-141-3p   | 7.72153666  | 0.708549442  | 0.433859661  | 1.633116664  | 0.102444463  | hsa-miR-141-3p   | 7.72153666     | 0.565816309  | 0.442711447  | 1.278070205  | 0.2012124674 | 0.361924934 |             |
| hsa-miR-125a-3p  | 465.121529  | -0.233659392 | 0.1433040172 | -1.630065936 | 0.103087562  | hsa-miR-125a-3p  | 465.121529     | 0.096509169  | 0.143433889  | 0.672847747  | 0.501044158  | 0.656511486 |             |
| hsa-miR-1255a    | 147.1742777 | -0.280501453 | 0.172323241  | -1.627761734 | 0.103575417  | hsa-miR-1255a    | 147.1742777    | -0.366427886 | 0.175123597  | -2.092395833 | 0.036403121  | 0.091537946 |             |
| hsa-miR-1910-3p  | 1.308016992 | 0.792638352  | 0.488504274  | 1.622582225  | 0.105678743  | hsa-miR-1910-3p  | 1.308016992    | 0.636152278  | 0.484379741  | 1.313333786  | 0.189070499  | 0.084297912 |             |
| hsa-miR-5488     | 29.3218692  | -0.414518302 | 0.256100101  | -1.615135845 | 0.106281228  | hsa-miR-5488     | 29.3218692     | -0.669457771 | 0.492710222  | -2.263138402 | 0.023627159  | 0.065332037 |             |
| hsa-miR-2116-5p  | 6.198151008 | -0.774515146 | 0.479535606  | -0.774515146 | 0.106281228  | hsa-miR-2116-5p  | 6.198151008    | -1.150714425 | 0.492710222  | -2.263138402 | 0.023627159  | 0.065332037 |             |
| hsa-miR-3934-5p  | 9.831071305 | -0.691213036 | 0.435176941  | -1.588349406 | 0.112207351  | hsa-miR-3934-5p  | 9.831071305    | -1.916542375 | 0.4689275    | -4.08760696  | 4.37E-05     | 0.000247757 |             |
| hsa-miR-183-3p   | 79.4137639  | -0.286092481 | 0.180277101  | -1.578788884 | 0.114384489  | hsa-miR-183-3p   | 79.4137639     | -0.371878047 | 0.168850913  | -2.202404714 | 0.027636733  | 0.073792927 |             |
| hsa-miR-548e-3p  | 111.769418  | -0.260155693 | 0.164781812  | -1.578788884 | 0.114384489  | hsa-miR-548e-3p  | 111.769418     | -0.260128649 | 0.113968329  | -2.074094236 | 0.03807056   | 0.095115193 |             |
| hsa-miR-106b-3p  | 1466.18886  | 0.177937633  | 0.1133226687 | 1.571513952  | 0.116063316  | hsa-miR-106b-3p  | 1466.18886     | -0.367881055 | 0.113968329  | -2.074094236 | 0.03807056   | 0.095115193 |             |
| hsa-miR-556-5p   | 3.226412523 | 0.835230325  | 0.53193341   | 1.570178353  | 0.116373624  | hsa-miR-556-5p   | 3.226412523    | 0.367865036  | 0.540561622  | 0.680523776  | 0.496172872  | 0.653722717 |             |
| hsa-miR-363-3p   | 3.254863684 | 0.850124515  | 0.542238473  | 1.567805601  | 0.116926507  | hsa-miR-363-3p   | 3.254863684    | 1.966495119  | 0.534369147  | 3.642603864  | 0.000269894  | 0.001310673 |             |
| hsa-miR-338-3p   | 14.4025873  | -0.57756351  | 0.36971639   | -1.562179891 | 0.118245616  | hsa-miR-338-3p   | 14.4025873     | -0.16757885  | 0.233379806  | -0.719139489 | 0.472730473  | 0.638427913 |             |
| hsa-miR-34b-5p   | 45.71562656 | 0.346713353  | 0.222009251  | 1.561707578  | 0.118356893  | hsa-miR-34b-5p   | 45.71562656    | -0.767968409 | 0.350453879  | -2.191398461 | 0.02842297   | 0.075416927 |             |
| hsa-miR-483-5p   | 8.244123439 | -0.800300414 | 0.515944724  | -1.551133959 | 0.120869105  | hsa-miR-483-5p   | 8.244123439    | 2.057966303  | 0.479190965  | 4.29466842   | 1.75E-05     | 0.00010538  |             |
| hsa-miR-5094     | 6.53130729  | -0.704815888 | 0.459505662  | -1.533856807 | 0.125064884  | hsa-miR-5094     | 6.53130729     | -1.075114436 | 0.475367224  | -2.261650324 | 0.023719016  | 0.06533346  |             |
| hsa-miR-683e-5p  | 2.862382281 | -0.841090684 | 0.553475147  | -1.517625932 | 0.128297976  | hsa-miR-683e-5p  | 2.862382281    | 0.120059507  | 0.54965128   | 0.218428505  | 0.827095258  | 0.908985878 |             |
| hsa-miR-3688-3p  | 17.20723694 | -0.509369848 | 0.335712432  | -1.512915635 | 0.129200449  | hsa-miR-3688-3p  | 17.20723694    | -0.524951972 | 0.343380118  | -1.52877773  | 0.126319555  | 0.255252624 |             |
| hsa-miR-616-5p   | 15.80235747 | -0.473464397 | 0.313716355  | -1.509155334 | 0.131259947  | hsa-miR-616-5p   | 15.80235747    | 0.054850265  | 0.309962313  | 0.71695785   | 0.859541497  | 0.926302002 |             |
| hsa-miR-1284     | 1.671732516 | -0.833468596 | 0.558510937  | -1.492304878 | 0.135619239  | hsa-miR-1284     | 1.671732516    | -0.063262206 | 0.559882214  | -0.112991992 | 0.910063904  | 0.960683004 |             |
| hsa-miR-612      | 1.214175232 | 0.719176792  | 0.481845649  | 1.492527578  | 0.135560893  | hsa-miR-612      | 1.214175232    | 0.638995447  | 0.478144455  | 1.336521133  | 0.181440268  | 0.336473021 |             |
| hsa-miR-4659a-3p | 2.025726002 | -0.832112311 | 0.592947698  | -1.487913699 | 0.1274672214 | hsa-miR-4659a-3p | 2.025726002    | -0.453394407 | 0.55927305   | -0.811040401 | 0.417344028  | 0.593307464 |             |
| hsa-miR-686e-5p  | 13.2560061  | 0.494194337  | 0.332154507  | 1.487844746  | 0.136718442  | hsa-miR-686e-5p  | 13.2560061     | -0.244627545 | 0.356730974  | -0.68574798  | 0.492877045  | 0.653722117 |             |
| hsa-miR-3157-3p  | 10.48051067 | -0.603012097 | 0.407696136  | -1.479072388 | 0.139120969  | hsa-miR-3157-3p  | 10.48051067    | -0.182151738 | 0.406691442  | -0.447886824 | 0.654234878  | 0.786904799 |             |
| hsa-miR-6501-5p  | 1.561324536 | 0.756562527  | 0.512558534  | 1.476050979  | 0.139930207  | hsa-miR-6501-5p  | 1.561324536    | 0.458324546  | 0.50785414   | 0.902472797  | 0.366805766  | 0.54390855  |             |
| hsa-miR-990-5p   | 6.666043765 | -0.22211162  | 0.150352698  | -1.477301064 | 0.139594953  | hsa-miR-990-5p   | 6.666043765    | -0.276081724 | 0.150419869  | -1.835407286 | 0.066445365  | 0.155039185 |             |
| hsa-miR-519a-3p  | 11.51105489 | -0.557188104 | 0.37939774   | -1.468612078 | 0.141938037  | hsa-miR-519a-3p  | 11.51105489    | -1.05714217  | 0.3997958    | -2.644205293 | 0.008188298  | 0.026528814 |             |
| hsa-miR-767-5p   | 363.8595703 | 0.159595436  | 0.108887916  | 1.465685476  | 0.142733993  | hsa-miR-767-5p   | 363.8595703    | -0.151895107 | 0.111527331  | -1.361954115 | 0.173212366  | 0.325086977 |             |
| hsa-miR-135b-5p  | 288.3414806 | 0.249768583  | 0.17058309   | 1.464204822  | 0.143137993  | hsa-miR-135b-5p  | 288.3414806    | 0.127798732  | 0.171976985  | 0.734115315  | 0.457411869  | 0.626823672 |             |
| hsa-miR-1224-5p  | 1.506603125 | 0.758208488  | 0.518352026  | 1.462728898  | 0.143541576  | hsa-miR-1224-5p  | 1.506603125    | 1.099998063  | 0.518135877  | 2.1229915    | 0.033745654  | 0.085991136 |             |
| hsa-miR-199b-3p  | 4.888463596 | 0.706662981  | 0.498654273  | 1.417140131  | 0.156441962  | hsa-miR-199b-3p  | 4.888463596    | 0.026589262  | 0.512902971  | 0.051840725  | 0.958655606  | 0.982381261 |             |
| hsa-miR-362-3p   | 0.980760169 | 0.6114482264 | 0.433207323  | 1.411523377  | 0.158909047  | hsa-miR-362-3p   | 0.980760169    | 0.337668116  | 0.428031831  | 0.788885526  | 0.430178916  | 0.605523583 |             |
| hsa-miR-331-5p   | 121.2848198 | -0.275390281 | 0.195495978  | -1.408513451 | 0.158909047  | hsa-miR-331-5p   | 121.2848198    | 0.088320363  | 0.195539741  | 0.451674747  | 0.651503313  | 0.784834223 |             |
| hsa-miR-505-5p   | 9.209798803 | -0.521889848 | 0.374669909  | -1.39293238  | 0.163640282  | hsa-miR-505-5p   | 9.209798803    | -1.04766836  | 0.3822107513 | -1.093661041 | 0.274367     | 0.453381189 |             |
| hsa-miR-6716-3p  | 5.869817192 | -0.620358923 | 0.44747876   | -1.386344724 | 0.165642277  | hsa-miR-6716-3p  | 5.869817192    | -1.250200943 | 0.473477832  | -2.640463522 | 0.00827927   | 0.02658616  |             |
| hsa-miR-4484     | 30.64401838 | 0.754995227  | 0.545999219  | 1.382777118  | 0.166733217  | hsa-miR-4484     | 30.64401838    | 0.78186298   | 0.546250794  | 1.431336029  | 0.152336797  | 0.292984385 |             |
| hsa-miR-326-3p   | 1163.925265 | 0.137399913  | 0.099703242  | 1.378088719  | 0.168175908  | hsa-miR-326-3p   | 1163.925265    | 0.124241309  | 0.100200591  | 1.299295912  | 0.215002799  | 0.480540261 |             |
| hsa-miR-3126-5p  | 4.07513789  | -0.716634054 | 0.523036613  | -1.370141278 | 0.170642805  | hsa-miR-3126-5p  | 4.07513789     | -0.551762761 | 0.525764933  | -1.049447627 | 0.229307148  | 0.383892861 |             |
| hsa-miR-5001-5p  | 3.46279656  | -0.732902817 | 0.535515821  | -1.368929228 | 0.171126759  | hsa-miR-5001-5p  | 3.46279656     | -0.083165354 | 0.532174467  | -0.156274603 | 0.873816574  | 0.936051552 |             |
| hsa-miR-527      | 1.175136348 | -0.716303573 | 0.526077663  | -1.361592828 | 0.17332642   | hsa-miR-527      | 1.175136348    | -1.142770297 | 0.515223161  | -2.218010336 | 0.026554128  | 0.071392931 |             |
| hsa-miR-6723-5p  | 51.65047164 | -0.267566837 | 0.197771915  | -1.353267942 | 0.17332642   | hsa-miR-6723-5p  | 51.65047164    | 0.480636021  | 0.184896333  | 5.383879918  | 7.09E-08     | 6.13E-07    |             |
| hsa-miR-660-3p   | 0.962994124 | -0.660535257 | 0.490980899  | -1.34537392  | 0.17851611   | hsa-miR-660-3p   | 0.962994124    | -0.925815619 | 0.482721136  | -1.917909847 | 0.055122443  | 0.132242157 |             |
| hsa-miR-5583-5p  | 0.947126432 | 0.527471738  | 0.394081349  | 1.338484399  | 0.180738583  | hsa-miR-5583-5p  | 0.947126432    | -0.067198715 | 0.387440134  | -0.173442836 | 0.862303357  | 0.927449786 |             |

|                 |             |              |             |              |             |             |                   |             |              |             |               |              |             |
|-----------------|-------------|--------------|-------------|--------------|-------------|-------------|-------------------|-------------|--------------|-------------|---------------|--------------|-------------|
| hsa-mir-374b-3p | 320.2059896 | -0.144783884 | 0.108330536 | -1.336501128 | 0.181385532 | 0.343272119 | hsa-mir-374b-3p   | 320.2059896 | 0.301983442  | 0.10799709  | 2.796218334   | 0.005170446  | 0.017697958 |
| hsa-mir-361-5p  | 1447.22573  | 0.162654975  | 0.121935214 | 1.333944144  | 0.182222163 | 0.343995454 | hsa-mir-361-5p    | 1447.22573  | 0.223575792  | 0.122192001 | 1.829595321   | 0.067315279  | 0.156598117 |
| hsa-mir-193b-3p | 531.6710679 | -0.169817685 | 0.12848477  | -1.320795058 | 0.182669715 | 0.350452478 | hsa-mir-193b-3p   | 531.6710679 | 0.89607052   | 0.126963025 | 7.057728183   | 1.69E-12     | 2.29E-11    |
| hsa-mir-4768-5p | 9.85409701  | 0.5014635    | 0.379666663 | -1.320795703 | 0.186568492 | 0.350452478 | hsa-mir-4768-5p   | 9.85409701  | -0.227644481 | 0.382074855 | -0.595811207  | 0.551301356  | 0.702286458 |
| hsa-mir-579-5p  | 6.703079431 | -0.630471447 | 0.478036999 | -1.31887586  | 0.182710618 | 0.350788212 | hsa-mir-579-5p    | 6.703079431 | -0.986233635 | 0.490283154 | -2.011559296  | 0.044266414  | 0.108844948 |
| hsa-mir-4647    | 1.540602822 | -0.725488797 | 0.551070733 | -1.316507579 | 0.188003736 | 0.351404514 | hsa-mir-4647      | 1.540602822 | -1.383087258 | 0.540256107 | -2.560058835  | 0.010465433  | 0.032970441 |
| hsa-mir-378a-5p | 2.446700215 | 0.716714259  | 0.546328978 | -1.311873044 | 0.189562974 | 0.353404623 | hsa-mir-378a-5p   | 2.446700215 | 0.826687221  | 0.545334361 | 1.515927256   | 0.129537748  | 0.381629041 |
| hsa-mir-2115-3p | 7.76859758  | -0.647387968 | 0.498241463 | -1.299345831 | 0.193825273 | 0.360505482 | hsa-mir-2115-3p   | 7.76859758  | 0.602469363  | 0.487777603 | 1.235131254   | 0.216781659  | 0.250294831 |
| hsa-mir-6500-3p | 5.835986017 | 0.611439706  | 0.471878651 | 1.295756239  | 0.195059479 | 0.361911828 | hsa-mir-6500-3p   | 5.835986017 | -0.904022239 | 0.504959126 | -1.790287951  | 0.073407632  | 0.16778803  |
| hsa-mir-15b-5p  | 1263.315359 | -0.181859198 | 0.141153469 | -1.288372336 | 0.197613983 | 0.365204198 | hsa-mir-15b-5p    | 1263.315359 | 0.14150986   | 0.14150986  | -1.56287601   | 0.129446645  | 0.258162904 |
| hsa-mir-573     | 10.42169893 | -0.482910515 | 0.374974742 | 1.287845919  | 0.197798389 | 0.365204198 | hsa-mir-573       | 10.42169893 | -2.992658697 | 0.494636559 | -6.050217611  | 1.45E-09     | 1.42E-08    |
| hsa-mir-423-3p  | 15449.66406 | -0.14582905  | 0.113588844 | -1.283859292 | 0.199199369 | 0.366895189 | hsa-mir-423-3p    | 15449.66406 | 0.286896386  | 0.113583239 | 2.525986930   | 0.01154125   | 0.034893195 |
| hsa-mir-224-5p  | 455.4689191 | -0.173808221 | 0.135911203 | -1.278836602 | 0.200954602 | 0.369229693 | hsa-mir-224-5p    | 455.4689191 | -0.510215707 | 0.137792223 | -3.702790301  | 0.000213241  | 0.00105534  |
| hsa-mir-5585-3p | 4.564002814 | -0.604347263 | 0.474654714 | -1.273235566 | 0.202934463 | 0.371964622 | hsa-mir-5585-3p   | 4.564002814 | -0.229960396 | 0.474545307 | -0.484591024  | 0.627966482  | 0.77326459  |
| hsa-mir-4791    | 1.550512831 | 0.648599233  | 0.510684071 | 1.270059651  | 0.204063383 | 0.373130389 | hsa-mir-4791      | 1.550512831 | 0.562112788  | 0.507530518 | 1.107544804   | 0.268058452  | 0.444096839 |
| hsa-mir-151b    | 37161.3148  | 0.120324533  | 0.096408152 | 1.248074268  | 0.212003861 | 0.386715476 | hsa-mir-151b/151a | 37161.3148  | -0.180624898 | 0.096437834 | -1.872967182  | 0.061072917  | 0.143798959 |
| /151a-5p        | 352.5575134 | 0.147736949  | 0.119187306 | 1.239535932  | 0.215147091 | 0.391504543 | hsa-mir-140-5p    | 352.5575134 | 0.228254332  | 0.120193716 | 1.899053784   | 0.05757405   | 0.136347877 |
| hsa-mir-140-5p  | 231.6792411 | -0.309630422 | 0.252985    | -1.229908227 | 0.220986835 | 0.401167974 | hsa-mir-589-3p    | 231.6792411 | 0.219219473  | 0.252633866 | 0.867735892   | 0.385538932  | 0.560762222 |
| hsa-mir-589-3p  | 6.742429803 | -0.6229391   | 0.512882956 | -1.215294212 | 0.224253899 | 0.406124883 | hsa-mir-503-3p    | 6.742429803 | -0.821805049 | 0.518455879 | -1.585101996  | 0.112943162  | 0.234643949 |
| hsa-mir-503-3p  | 5.066922606 | 0.572229383  | 0.473653308 | 1.208257654  | 0.226648172 | 0.410023308 | hsa-mir-590-5p    | 5.066922606 | 0.015850016  | 0.490611995 | 0.032306621   | 0.974227529  | 0.984500929 |
| hsa-mir-590-5p  | 3.448155521 | 0.665860138  | 0.551933446 | -1.206413822 | 0.227657969 | 0.410326387 | hsa-mir-570-3p    | 3.448155521 | -0.591136317 | 0.553879729 | 1.067264761   | 0.288585226  | 0.465737405 |
| hsa-mir-570-3p  | 3.84310597  | -0.625487311 | 0.524626461 | -1.192241215 | 0.233166661 | 0.418236417 | hsa-mir-4668-5p   | 3.84310597  | -0.5081216   | 0.527963914 | -0.964217292  | 0.333840031  | 0.511699104 |
| hsa-mir-4668-5p | 3.714456003 | 0.64047391   | 0.356927056 | 1.192820657  | 0.232227867 | 0.418236417 | hsa-mir-5699-3p   | 3.714456003 | 0.503315263  | 0.541038736 | 0.990275837   | 0.352228285  | 0.529356467 |
| hsa-mir-5699-3p | 42.73767363 | -0.256583527 | 0.217053342 | -1.18212035  | 0.237157951 | 0.424417421 | hsa-le1-a-2-3p    | 42.73767363 | -0.226562966 | 0.222226563 | -1.019513432  | 0.307992928  | 0.489333407 |
| hsa-le1-a-2-3p  | 11.77904028 | -0.428662769 | 0.361865684 | -1.176835144 | 0.239254127 | 0.4271589   | hsa-mir-219b-3p   | 11.77904028 | 0.220415516  | 0.35538813  | 0.620210686   | 0.535119087  | 0.687252117 |
| hsa-mir-219b-3p | 1.296072124 | -0.598306075 | 0.511026168 | -1.170897919 | 0.243163913 | 0.430403149 | hsa-mir-410-3p    | 1.296072124 | -0.422890897 | 0.509051707 | -0.83074252   | 0.406119101  | 0.581131752 |
| hsa-mir-410-3p  | 32.05618981 | -0.290806475 | 0.249300512 | -1.166488079 | 0.24317166  | 0.432551161 | hsa-mir-132-5p    | 32.05618981 | 0.761042832  | 0.237962271 | 3.198164692   | 0.001383053  | 0.00559394  |
| hsa-mir-132-5p  | 8.037137367 | 0.480011779  | 0.416311611 | 1.15301065   | 0.248906013 | 0.441268974 | hsa-mir-664a-3p   | 8.037137367 | 0.890538618  | 0.415505275 | 2.143266689   | 0.032091669  | 0.082479701 |
| hsa-mir-664a-3p | 102.635678  | 0.191772218  | 0.167213365 | -1.146869979 | 0.251435362 | 0.44471161  | hsa-mir-143-3p    | 102.635678  | 1.140316766  | 0.162634807 | 7.011517334   | 2.36E-12     | 2.95E-11    |
| hsa-mir-143-3p  | 7.500449199 | -0.583303015 | 0.511129174 | -1.141204699 | 0.253784749 | 0.446779198 | hsa-mir-4449      | 7.500449199 | 0.111494148  | 0.508083231 | 0.219440716   | 0.826306756  | 0.908985878 |
| hsa-mir-4449    | 1.535094035 | -0.623824887 | 0.547884636 | -1.142256683 | 0.253347441 | 0.446779198 | hsa-mir-676-5p    | 1.535094035 | -0.566684457 | 0.545443037 | -1.038914092  | 0.298844692  | 0.477782563 |
| hsa-mir-676-5p  | 21.53849335 | -0.390760979 | 0.344976691 | -1.132717047 | 0.257333096 | 0.450568833 | hsa-mir-580-3p    | 21.53849335 | -0.401564753 | 0.350546888 | -1.14537921   | 0.251986396  | 0.426565207 |
| hsa-mir-580-3p  | 1.474858345 | 0.597787328  | 0.52824243  | -1.131653374 | 0.257780191 | 0.450568833 | hsa-mir-675-3p    | 1.474858345 | 0.471658034  | 0.524664551 | 0.898970651   | 0.368668293  | 0.545529074 |
| hsa-mir-675-3p  | 620.7677639 | -0.15634481  | 0.137962916 | -1.133237993 | 0.257114348 | 0.450568833 | hsa-mir-7974      | 620.7677639 | -2.379701761 | 0.147579049 | -16.142029371 | 1.84E-58     | 2.04E-56    |
| hsa-mir-7974    | 1.563308596 | -0.573244237 | 0.508613683 | -1.127071993 | 0.259712043 | 0.453000039 | hsa-mir-1257      | 1.563308596 | -0.512784861 | 0.505987139 | -1.013343457  | 0.310857632  | 0.492923459 |
| hsa-mir-1257    | 74.45601108 | 0.220074673  | 0.195652561 | 1.124823388  | 0.260663673 | 0.453614714 | hsa-mir-873-5p    | 74.45601108 | 0.136628604  | 0.199799489 | 0.683828592   | 0.494083409  | 0.653722717 |
| hsa-mir-873-5p  | 5.032190968 | 0.523047862  | 0.466784523 | -1.120533858 | 0.262486333 | 0.455738885 | hsa-mir-2277-3p   | 5.032190968 | 0.771313273  | 0.469243984 | 1.643736093   | 0.100230727  | 0.211628465 |
| hsa-mir-2277-3p | 8.730170166 | -0.402022831 | 0.365560198 | -1.099478851 | 0.27161434  | 0.470416488 | hsa-mir-5484-5p   | 8.730170166 | -0.584532292 | 0.382510998 | -1.528145062  | 0.126476525  | 0.25525624  |
| hsa-mir-5484-5p | 103967.6103 | 0.1132532137 | 0.121677232 | -1.08921065  | 0.276061004 | 0.473873424 | hsa-mir-30e-5p    | 103967.6103 | -0.107462496 | 0.121681534 | -0.883145477  | 0.3771157676 | 0.553977616 |
| hsa-mir-30e-5p  | 1.031751375 | 0.516920307  | 0.47345846  | 1.089715719  | 0.275833096 | 0.473873424 | hsa-mir-4421      | 1.031751375 | 0.054929608  | 0.46633642  | 0.117781939   | 0.906240441  | 0.959327582 |
| hsa-mir-4421    | 18.21475573 | -0.441586969 | 0.40420291  | -1.092488345 | 0.274618511 | 0.473873424 | hsa-mir-5010-5p   | 18.21475573 | 0.304130357  | 0.399938319 | 0.760443154   | 0.446989737  | 0.616941878 |
| hsa-mir-5010-5p | 61.74654832 | 0.235262946  | 0.215944157 | 1.089461968  | 0.275950217 | 0.473873424 | hsa-mir-651-5p    | 61.74654832 | 0.252528241  | 0.219327054 | 1.151377524   | 0.249576956  | 0.424308941 |
| hsa-mir-651-5p  | 19.67128807 | 0.36353087   | 0.335185035 | -1.084580303 | 0.278107583 | 0.473873424 | hsa-mir-5700      | 19.67128807 | -0.821818758 | 0.379709224 | -2.166331827  | 0.030438892  | 0.079653854 |
| hsa-mir-5700    | 7.909458041 | -0.333087156 | 0.308137379 | -1.080841975 | 0.279767143 | 0.478067666 | hsa-mir-3916      | 7.909458041 | 0.663595057  | 0.425408757 | 1.559898949   | 0.11878335   | 0.244166186 |
| hsa-mir-3916    | 3.338860757 | 0.452272432  | 0.422328673 | 1.072109144  | 0.283671012 | 0.483646298 | hsa-mir-3160-3p   | 3.338860757 | 0.761015021  | 0.541435456 | 1.405550768   | 0.159857564  | 0.304434625 |
| hsa-mir-4519    | 5.722468009 | 0.572468009  | 0.539887686 | 1.060346483  | 0.289886999 | 0.491602604 | hsa-mir-6854-5p   | 5.722468009 | -0.094247786 | 0.515221593 | -0.182924573  | 0.854874731  | 0.924729333 |
| hsa-mir-6854-5p | 6.996956522 | 0.445897748  | 0.428611696 | 1.040330332  | 0.293196457 | 0.504986673 | hsa-mir-939-5p    | 6.996956522 | -0.360222416 | 0.453650493 | -0.79407481   | 0.427115188  | 0.602355947 |
| hsa-mir-939-5p  | 24.13925562 | 0.290219392  | 0.279922792 | 1.036783716  | 0.299836666 | 0.506636363 | hsa-mir-4797-3p   | 24.13925562 | 0.025827728  | 0.290542831 | 0.088894734   | 0.929165568  | 0.968839201 |
| hsa-mir-4797-3p | 34.40186711 | -0.242813727 | 0.236361489 | -1.030553405 | 0.302750296 | 0.510427559 | hsa-mir-627-3p    | 34.40186711 | -0.352332057 | 0.243769692 | -1.445430126  | 0.148337106  | 0.287426264 |

|                          |             |              |             |              |             |              |                       |             |              |             |              |              |             |
|--------------------------|-------------|--------------|-------------|--------------|-------------|--------------|-----------------------|-------------|--------------|-------------|--------------|--------------|-------------|
| hsa-miR-215-5p           | 11632.55024 | -0.138744322 | 0.13505284  | -1.027333611 | 0.304263401 | 0.511838654  | hsa-miR-215-5p/192    | 11632.55024 | -0.522335113 | 0.135132743 | -3.865348261 | 0.000110931  | 0.000574622 |
| hsa-miR-5000-3p          | 18.82526946 | 0.30862482   | 0.301668224 | 1.023060421  | 0.306279279 | 0.514087933  | hsa-miR-5000-3p       | 18.82526946 | -0.089263595 | 0.316235745 | -0.288269149 | 0.777737139  | 0.873706991 |
| hsa-miR-2114-5p          | 1.614661855 | 0.532670838  | 0.530127332 | 1.004797915  | 0.314994168 | 0.527545543  | hsa-miR-2114-5p       | 1.614661855 | 1.597858481  | 0.535602802 | 2.983289995  | 0.002851677  | 0.010402595 |
| hsa-miR-185-3p           | 103.2205728 | -0.182470682 | 0.182102793 | -1.002020228 | 0.316333824 | 0.528137867  | hsa-miR-185-3p        | 103.2205728 | -0.274246564 | 0.185779229 | -1.476196048 | 0.13998127   | 0.273104314 |
| hsa-miR-4786-5p          | 4.231261019 | -0.536238623 | 0.536185785 | -1.000098545 | 0.31726282  | 0.528137867  | hsa-miR-4786-5p       | 4.231261019 | -0.038432759 | 0.535026104 | -0.071833428 | 0.94273447   | 0.97976888  |
| hsa-miR-5484k            | 7.062289832 | -0.448838422 | 0.448993934 | -0.999730685 | 0.317440858 | 0.528137867  | hsa-miR-5484k/5484    | 7.062289832 | -1.160065168 | 0.47211904  | -2.457145487 | 0.014004596  | 0.041532714 |
| hsa-miR-300-3p           | 33.23204519 | -0.273121462 | 0.27455713  | -0.99477097  | 0.319847668 | 0.530975186  | hsa-miR-300-3p        | 33.23204519 | 0.23478638   | 0.27269576  | 0.860982879  | 0.389247473  | 0.56112298  |
| hsa-miR-6770-3p          | 8.53183167  | 0.426354734  | 0.432627947 | 0.985499571  | 0.324378554 | 0.537318689  | hsa-miR-6770-3p       | 8.53183167  | -0.411813544 | 0.453768353 | -0.90754135  | 0.364120593  | 0.540959276 |
| hsa-miR-5697             | 2.990995284 | -0.550190894 | 0.559923645 | -0.983825158 | 0.325201487 | 0.537505515  | hsa-miR-5697          | 2.990995284 | -0.845202177 | 0.55760919  | -1.575760846 | 0.129579836  | 0.258162904 |
| hsa-miR-4436b-3p         | 1.391998945 | -0.423897712 | 0.435198948 | -0.974032024 | 0.330040639 | 0.543132095  | hsa-miR-4436b-3p      | 1.391998945 | -0.327476817 | 0.433438449 | -0.755532458 | 0.449929564  | 0.619849772 |
| hsa-miR-4482-3p          | 10.5233576  | -0.364654147 | 0.374186394 | -0.974525405 | 0.329795732 | 0.543132095  | hsa-miR-4482-3p       | 10.5233576  | -0.387435334 | 0.383547733 | -1.0101359   | 0.312430184  | 0.494415995 |
| hsa-miR-186-5p           | 87488.67323 | 0.054090225  | 0.055647778 | 0.972019246  | 0.331040974 | 0.543596567  | hsa-miR-186-5p        | 87488.67323 | -0.290324187 | 0.055671559 | -5.214946253 | 1.84E-07     | 1.44E-06    |
| hsa-miR-6514-5p          | 4.282909909 | -0.538287682 | 0.55198367  | -0.967345589 | 0.333371301 | 0.546238257  | hsa-miR-6514-5p       | 4.282909909 | -1.221180248 | 0.558071835 | -2.188213364 | 0.028654064  | 0.07528598  |
| hsa-miR-3944-3p          | 2.810889773 | -0.538287682 | 0.557447741 | -0.965628959 | 0.334229879 | 0.546462243  | hsa-miR-3944-3p       | 2.810889773 | -0.969138749 | 0.554668305 | -1.74724018  | 0.080595685  | 0.1804693   |
| hsa-miR-615-3p           | 101.6960589 | -0.145344621 | 0.15108275  | -0.96201996  | 0.336039578 | 0.548236983  | hsa-miR-615-3p        | 101.6960589 | -0.55974751  | 0.159136982 | -3.49368665  | 0.0004764    | 0.002152108 |
| hsa-miR-4638-3p          | 7.681331954 | 0.457104112  | 0.478200107 | 0.955884587  | 0.339130547 | 0.552089944  | hsa-miR-4638-3p       | 7.681331954 | 0.65591113   | 0.480232935 | 1.364735907  | 0.17233607   | 0.324669499 |
| hsa-miR-486-3p/486-5p    | 738.5044707 | 0.142369429  | 0.149179583 | 0.9543494288 | 0.339906867 | 0.552166305  | hsa-miR-486-3p/486-5p | 738.5044707 | 0.82446389   | 0.148790923 | 5.541089967  | 3.01E-08     | 2.68E-07    |
| hsa-miR-3166             | 1.292067907 | -0.478136355 | 0.504989124 | -0.946825056 | 0.343727932 | 0.557177825  | hsa-miR-3166          | 1.292067907 | -0.280573594 | 0.503352102 | -0.57410196  | 0.577247201  | 0.726168381 |
| hsa-miR-550a-3-5p        | 1.854751185 | -0.481520881 | 0.51011044  | -0.949594178 | 0.345193064 | 0.558357157  | hsa-miR-550a-3-5p     | 1.854751185 | -0.644368454 | 0.506202928 | -1.272944936 | 0.20307582   | 0.364342266 |
| hsa-miR-583              | 5.827917812 | 0.512035054  | 0.560155299 | 0.928947837  | 0.35291612  | 0.569692257  | hsa-miR-583           | 5.827917812 | 0.33753061   | 0.559837479 | 0.602908206  | 0.545657957  | 0.658494574 |
| hsa-miR-4690-5p          | 1.973841027 | 0.511527628  | 0.556117582 | -0.919819197 | 0.35760725  | 0.576062252  | hsa-miR-4690-5p       | 1.973841027 | 0.711345931  | 0.555550973 | 1.280433237  | 0.200392811  | 0.361758799 |
| hsa-miR-103a-2-5p        | 11.71852131 | 0.371942719  | 0.406617473 | 0.914734963  | 0.360307855 | 0.577772882  | hsa-miR-103a-2-5p     | 11.71852131 | 0.272912855  | 0.413649956 | 0.65976764   | 0.509402953  | 0.660781121 |
| hsa-miR-224-3p           | 1.430297474 | 0.479503505  | 0.524745449 | 0.913783066  | 0.360830846 | 0.577722862  | hsa-miR-224-3p        | 1.430297474 | 0.463884805  | 0.52183105  | 0.888959527  | 0.374026766  | 0.551458819 |
| hsa-miR-1578             | 1328.004288 | -0.069216723 | 0.075771184 | -0.913496655 | 0.360981392 | 0.578591774  | hsa-miR-276-5p        | 1328.004288 | 0.18466778   | 0.07595121  | 2.443503382  | 0.014931618  | 0.043780631 |
| hsa-miR-1538             | 4.587110596 | 0.442591165  | 0.46979762  | 0.906694471  | 0.364581607 | 0.578892282  | hsa-miR-1538          | 4.587110596 | -0.378606192 | 0.494532219 | -0.765852398 | 0.443924821  | 0.615245441 |
| hsa-miR-2355-5p          | 50.17962269 | -0.241580089 | 0.266223099 | -0.907442474 | 0.364176945 | 0.578591774  | hsa-miR-2355-5p       | 50.17962269 | 0.218038932  | 0.265388895 | 0.821582729  | 0.411314422  | 0.587484018 |
| hsa-miR-545-5p           | 18.32698245 | -0.31320685  | 0.344448376 | -0.909311709 | 0.363185611 | 0.578591774  | hsa-miR-545-5p        | 18.32698245 | -0.362337943 | 0.351467709 | -1.030928116 | 0.30257453   | 0.481763136 |
| hsa-miR-744-3p           | 82.89913072 | -0.148690552 | 0.163632356 | -0.90886743  | 0.363515504 | 0.578591774  | hsa-miR-744-3p        | 82.89913072 | -0.163338842 | 0.167859778 | -0.973067188 | 0.33051991   | 0.509551529 |
| hsa-miR-3939             | 4.358718006 | -0.4964693   | 0.549860477 | -0.902900501 | 0.366578705 | 0.579778015  | hsa-miR-3939          | 4.358718006 | -0.73224315  | 0.552653741 | -1.324942292 | 0.185190292  | 0.341186285 |
| hsa-miR-579-3p           | 4.218282907 | -0.474440049 | 0.525771634 | -0.902369047 | 0.366668058 | 0.579778015  | hsa-miR-579-3p        | 4.218282907 | -0.49529133  | 0.530224293 | -0.935304806 | 0.349631239  | 0.526479598 |
| hsa-miR-4516             | 1.026718866 | 0.421778602  | 0.470045772 | 0.897314849  | 0.369550935 | 0.582812621  | hsa-miR-4516          | 1.026718866 | -0.013394096 | 0.462432018 | -0.028964466 | 0.976892931  | 0.984500929 |
| hsa-miR-26b-3p           | 404.653767  | -0.082084048 | 0.091698    | -0.89515361  | 0.370703509 | 0.583414878  | hsa-miR-26b-3p        | 404.653767  | -0.310997872 | 0.09430662  | -3.29731077  | 0.000974694  | 0.004071707 |
| hsa-miR-190a-5p          | 11.10333937 | 0.325990889  | 0.366758305 | 0.888843919  | 0.374086969 | 0.586301937  | hsa-miR-190a-5p       | 11.10333937 | 0.27262167   | 0.37553211  | 0.725960895  | 0.467862744  | 0.634664206 |
| hsa-miR-619-5p           | 19.94897134 | -0.325878545 | 0.366129255 | -0.890064209 | 0.37343141  | 0.586301937  | hsa-miR-619-5p        | 19.94897134 | 0.331469562  | 0.362366058 | 0.91473678   | 0.360329831  | 0.537566088 |
| hsa-miR-6818-5p          | 5.809859009 | -0.431338403 | 0.487719106 | -0.88449279  | 0.376430253 | 0.588755581  | hsa-miR-6818-5p       | 5.809859009 | -0.229324497 | 0.490398294 | -0.467629067 | 0.640049874  | 0.779496477 |
| hsa-miR-1266-5p          | 3.567395359 | -0.490516336 | 0.556182286 | -0.882020116 | 0.377765929 | 0.589666409  | hsa-miR-1266-5p       | 3.567395359 | -0.101727505 | 0.556202488 | -0.182896529 | 0.854879206  | 0.92479333  |
| hsa-miR-1684-5p          | 1.182808988 | -0.488342335 | 0.558288447 | -0.874714932 | 0.381729939 | 0.594566178  | hsa-miR-1684-5p       | 1.182808988 | -0.627446476 | 0.55723077  | -1.152972415 | 0.260177196  | 0.436005977 |
| hsa-miR-6294-5p          | 3.619192964 | 0.361932964  | 0.427471993 | 0.846693953  | 0.397165714 | 0.617366257  | hsa-miR-6294-5p       | 3.619192964 | 0.272198148  | 0.424634472 | 0.641017548  | 0.521511282  | 0.674233388 |
| hsa-miR-502-5p           | 7.074807338 | 0.34367257   | 0.407553687 | 0.843257173  | 0.399084629 | 0.618072354  | hsa-miR-502-5p        | 7.074807338 | -0.085085425 | 0.427110272 | -0.199211846 | 0.842097034  | 0.919756657 |
| hsa-miR-6735-5p          | 1.643089259 | -0.461619836 | 0.54762465  | -0.842949338 | 0.399256778 | 0.618072354  | hsa-miR-6735-5p       | 1.643089259 | -0.43807508  | 0.545208938 | -0.803499446 | 0.421686117  | 0.596812592 |
| hsa-miR-212-5p           | 8.8404438   | 0.337229585  | 0.402999046 | 0.838047673  | 0.402196393 | 0.618550436  | hsa-miR-212-5p        | 8.8404438   | 0.846219499  | 0.399546319 | 2.117950932  | 0.034199223  | 0.08678842  |
| hsa-miR-500a-3p          | 816.3593944 | -0.114454428 | 0.136566947 | -0.838119321 | 0.400260699 | 0.618550436  | hsa-miR-500a-3p       | 816.3593944 | -0.296206195 | 0.137351237 | -2.156559874 | 0.031309724  | 0.08064007  |
| hsa-miR-662a             | 4.033710153 | 0.470433342  | 0.559426467 | 0.840918995  | 0.400393317 | 0.618550436  | hsa-miR-662a          | 4.033710153 | -1.183526176 | 0.554416015 | -2.134775809 | 0.032783414  | 0.083791817 |
| hsa-miR-1292-5p          | 1.987058678 | 0.468397743  | 0.560376881 | 0.835862899  | 0.403323037 | 0.619161565  | hsa-miR-1292-5p       | 1.987058678 | 0.162226938  | 0.559229833 | 0.290089922  | 0.771747446  | 0.87349861  |
| hsa-miR-107/103a-3p/103b | 47629.3172  | 0.05629556   | 0.06750523  | 0.8339943689 | 0.404312716 | 0.619564223  | hsa-miR-107/103a-3p   | 47629.3172  | -0.052950151 | 0.067528883 | -0.784111166 | 0.4329774884 | 0.608357116 |
| hsa-miR-4676-3p          | 3.498703131 | -0.415376008 | 0.500289575 | -0.830271165 | 0.406385487 | 0.621482452  | hsa-miR-4676-3p       | 3.498703131 | -1.302273664 | 0.526068969 | -2.47636093  | 0.013272932  | 0.039513672 |
| hsa-miR-33b-3p           | 26.61934341 | -0.217554565 | 0.263186792 | -0.826615777 | 0.408454419 | 0.6233837087 | hsa-miR-33b-3p        | 26.61934341 | 0.051525977  | 0.265009351 | 0.194440788  | 0.845838584  | 0.921762384 |

|                   |              |              |             |              |              |             |                   |              |              |             |               |              |              |
|-------------------|--------------|--------------|-------------|--------------|--------------|-------------|-------------------|--------------|--------------|-------------|---------------|--------------|--------------|
| hsa-miR-501-3p    | 107.6561699  | 0.138078434  | 0.168008425 | 0.821854221  | 0.41115987   | 0.626253564 | hsa-miR-501-3p    | 107.6561699  | -0.147703208 | 0.173243381 | -0.852576944  | 0.393894286  | 0.566770111  |
| hsa-miR-184       | 4.148208841  | -0.342813761 | 0.428844944 | -0.810159389 | 0.41784857   | 0.635163389 | hsa-miR-184       | 4.148208841  | 0.073876924  | 0.428112127 | 0.172564326   | 0.862993816  | 0.9277449786 |
| hsa-miR-1273d     | 11.542584484 | 0.376211034  | 0.466899633 | 0.805591712  | 0.420478306  | 0.657879915 | hsa-miR-1273d     | 11.542584484 | 0.718465606  | 0.467629192 | 1.5364000247  | 0.124440226  | 0.25311537   |
| hsa-miR-449c-5p   | 73.07270883  | 0.129943647  | 0.163521388 | 0.794658414  | 0.4246812229 | 0.664193715 | hsa-miR-449c-5p   | 73.07270883  | 0.631007919  | 0.162027118 | 3.894458702   | 9.84E-05     | 0.000516696  |
| hsa-miR-142-5p    | 6.480421414  | 0.328673932  | 0.415293658 | 0.791423538  | 0.428685817  | 0.647749967 | hsa-miR-142-5p    | 6.480421414  | -0.021068389 | 0.4332808   | -0.048635254  | 0.961217944  | 0.982381261  |
| hsa-miR-664a-5p   | 5.359990913  | 0.344865909  | 0.438400175 | 0.714252358  | 0.428698517  | 0.656071514 | hsa-miR-664a-5p   | 5.359990913  | 0.478553291  | 0.444307306 | 1.0770772202  | 0.281445756  | 0.461508511  |
| hsa-miR-548a      | 4.250219999  | 0.412975783  | 0.530990232 | 0.77774645   | 0.436718503  | 0.657628324 | hsa-miR-548a      | 4.250219999  | -1.051258722 | 0.540945743 | -1.943371835  | 0.0051971248 | 0.8251995562 |
| hsa-miR-4479      | 7.037257466  | -0.419050945 | 0.541751234 | -0.77351175  | 0.446715803  | 0.659700834 | hsa-miR-4479      | 7.037257466  | 0.166280396  | 0.540649968 | -0.363045237  | 0.716571092  | 0.1294000527 |
| hsa-miR-1908-3p   | 1.336640487  | -0.390217365 | 0.510620431 | -0.764202412 | 0.44474663   | 0.665362053 | hsa-miR-1908-3p   | 1.336640487  | -0.618287856 | 0.504785706 | -1.224852146  | 0.2220630933 | 0.3869757    |
| hsa-miR-6882-5p   | 4.691410904  | 0.337954548  | 0.442079035 | 0.764466353  | 0.444589938  | 0.665362053 | hsa-miR-6882-5p   | 4.691410904  | 0.498786419  | 0.474659963 | 1.050828926   | 0.293337168  | 0.778980164  |
| hsa-miR-34b-3p    | 1.082524403  | 0.321333444  | 0.421719798 | 0.761954837  | 0.440869599  | 0.666056205 | hsa-miR-34b-3p    | 1.082524403  | 0.196543473  | 0.418512041 | -0.069624416  | 0.638623377  | 0.778980164  |
| hsa-miR-1908-5p   | 2.202198417  | 0.424058455  | 0.560664115 | 0.75635027   | 0.449349215  | 0.667826867 | hsa-miR-1908-5p   | 2.202198417  | 0.025821655  | 0.560219335 | 0.046092046   | 0.963236886  | 0.982381261  |
| hsa-miR-3912-3p   | 70.73626194  | 0.144064262  | 0.190676349 | 0.755543422  | 0.449922989  | 0.667826867 | hsa-miR-3912-3p   | 70.73626194  | 0.193482991  | 0.193876133 | 0.997972202   | 0.318292839  | 0.499623304  |
| hsa-miR-4500      | 0.940222954  | 0.248189658  | 0.332979666 | 0.74359132   | 0.466054643  | 0.675603453 | hsa-miR-4500      | 0.940222954  | 0.22074894   | 0.33142182  | 0.666066404   | 0.505368657  | 0.659670569  |
| hsa-miR-2355-3p   | 7.66681223   | 0.34354389   | 0.46198536  | 0.743668522  | 0.457070738  | 0.675795544 | hsa-miR-2355-3p   | 7.66681223   | 0.429408928  | 0.33142182  | 0.921500948   | 0.356788946  | 0.534152237  |
| hsa-miR-3121-3p   | 2.685572668  | -0.408922315 | 0.55537346  | -0.736349388 | 0.461518097  | 0.67928932  | hsa-miR-3121-3p   | 2.685572668  | -0.306526801 | 0.556451102 | -0.550860645  | 0.581729468  | 0.72903382   |
| hsa-miR-4504      | 1.546304261  | 0.409130793  | 0.556382722 | 0.738064156  | 0.460475464  | 0.67928932  | hsa-miR-4504      | 1.546304261  | 0.157085812  | 0.553456677 | 0.283826754   | 0.77654315   | 0.873706901  |
| hsa-miR-99b-3p    | 7.697895619  | 0.06857114   | 0.092887743 | 0.738064156  | 0.460475464  | 0.67928932  | hsa-miR-99b-3p    | 7.697895619  | -0.161788894 | 0.094209062 | -1.717338971  | 0.085917255  | 0.40309011   |
| hsa-miR-3187-3p   | 0.94876608   | -0.277772343 | 0.382777904 | -0.725674966 | 0.468038052  | 0.685309102 | hsa-miR-3187-3p   | 0.94876608   | -0.452679724 | 0.379075456 | -1.194167853  | 0.232412315  | 0.40309011   |
| hsa-miR-6505-5p   | 6.055049802  | 0.334965749  | 0.460860734 | 0.726826402  | 0.467332307  | 0.685309102 | hsa-miR-6505-5p   | 6.055049802  | 0.33465935   | 0.467512412 | 0.715829873   | 0.474096404  | 0.63842913   |
| hsa-miR-190b      | 2.782681217  | 0.390248507  | 0.54024735  | 0.722351544  | 0.470078371  | 0.685644174 | hsa-miR-190b      | 2.782681217  | -0.027981351 | 0.547526781 | -0.05110499   | 0.95924166   | 0.982381261  |
| hsa-miR-3929      | 241.6792063  | 0.091360751  | 0.126312633 | 0.702390688  | 0.469501313  | 0.685644174 | hsa-miR-3929      | 241.6792063  | 1.602684029  | 0.12066832  | 13.28302932   | 2.90E-04     | 1.61E-38     |
| hsa-miR-489-3p    | 17.69304195  | -0.241414703 | 0.343560725 | -0.702684229 | 0.482252558  | 0.689935895 | hsa-miR-489-3p    | 17.69304195  | 0.166665586  | 0.326399566 | 3.359886775   | 0.000779744  | 0.0003565896 |
| hsa-miR-508-3p    | 6.665300098  | -0.293364281 | 0.416324013 | -0.70465376  | 0.481025754  | 0.699935895 | hsa-miR-508-3p    | 6.665300098  | -0.688659081 | 0.437079809 | -1.575545396  | 0.115130609  | 0.238550621  |
| hsa-miR-671-5p    | 128.3672969  | 0.11551976   | 0.16436228  | 0.7028362    | 0.482157835  | 0.699935895 | hsa-miR-671-5p    | 128.3672969  | -0.140181776 | 0.168675958 | -0.831071466  | 0.405933258  | 0.581131752  |
| hsa-miR-1306-5p   | 1.463704927  | 0.376134401  | 0.535304476 | 0.69199894   | 0.480937995  | 0.701970546 | hsa-miR-1306-5p   | 1.463704927  | 0.0493364602 | 0.5377275   | -0.918020263  | 0.92685146   | 0.968403683  |
| hsa-miR-301a-5p   | 21.55095917  | 0.242200414  | 0.351350467 | 0.689442563  | 0.490544807  | 0.701970546 | hsa-miR-301a-5p   | 21.55095917  | -0.132782101 | 0.360659528 | -0.686127939  | 0.712777839  | 0.827845113  |
| hsa-miR-3942-3p   | 7.01015729   | -0.305178999 | 0.440432777 | -0.6292071   | 0.488367854  | 0.701970546 | hsa-miR-3942-3p   | 7.01015729   | -0.194943392 | 0.445924802 | -0.437168758  | 0.661988965  | 0.793773806  |
| hsa-miR-4664-3p   | 6.137519831  | -0.384319221 | 0.556782061 | -0.690250725 | 0.490036529  | 0.701970546 | hsa-miR-4664-3p   | 6.137519831  | -0.255390439 | 0.557195302 | -0.45834995   | 0.646701043  | 0.78268958   |
| hsa-miR-5096      | 47.46743979  | -0.153888104 | 0.222436742 | -0.691828618 | 0.489044962  | 0.701970546 | hsa-miR-5096      | 47.46743979  | 0.665295486  | 0.216738917 | 3.065970961   | 0.002144565  | 0.008007825  |
| hsa-miR-548a      | 16.48079131  | 0.233232577  | 0.33514395  | 0.698890757  | 0.486497246  | 0.701970546 | hsa-miR-548a      | 16.48079131  | 0.377836168  | 0.339047967 | 1.1144003286  | 0.265106214  | 0.44161029   |
| hsa-miR-5701      | 150.0652804  | 0.231532124  | 0.332348175 | 0.696655319  | 0.486018527  | 0.701970546 | hsa-miR-5701      | 150.0652804  | 0.878286848  | 0.331815491 | 2.646913334   | 0.008123017  | 0.026528814  |
| hsa-miR-146b-5p   | 5450.973409  | -0.123250055 | 0.179387572 | -0.687060166 | 0.492044815  | 0.702788337 | hsa-miR-146b-5p   | 5450.973409  | 0.529121212  | 0.179347329 | 2.950259779   | 0.003175068  | 0.011368793  |
| hsa-miR-1343-3p   | 93.9264514   | 0.10349726   | 0.153278469 | 0.675232734  | 0.49953363   | 0.702788337 | hsa-miR-1343-3p   | 93.9264514   | -0.090634005 | 0.498404943 | -0.181848126  | 0.855701915  | 0.92472933   |
| hsa-miR-142-3p    | 4.343377614  | -0.357524752 | 0.536835659 | -0.665985476 | 0.505420384  | 0.710922623 | hsa-miR-142-3p    | 4.343377614  | -0.262322199 | 0.539071434 | -0.486618624  | 0.626528623  | 0.772718635  |
| hsa-miR-29b-2-5p  | 4.829786174  | -0.294360158 | 0.442294089 | -0.664748879 | 0.506191933  | 0.710922623 | hsa-miR-29b-2-5p  | 4.829786174  | -0.336731469 | 0.454821413 | -0.7040359754 | 0.4459081732 | 0.627202822  |
| hsa-miR-3177-3p   | 9.95246543   | -0.267662556 | 0.401538927 | -0.666425684 | 0.50513895   | 0.710922623 | hsa-miR-3177-3p   | 9.95246543   | -0.76828434  | 0.420263603 | -1.828101064  | 0.067534385  | 0.156639455  |
| hsa-miR-4694-5p   | 1.332245711  | -0.366926632 | 0.56842483  | -0.668839965 | 0.503371606  | 0.710922623 | hsa-miR-4694-5p   | 1.332245711  | -0.535391931 | 0.543950793 | -0.984168421  | 0.32503271   | 0.504241953  |
| hsa-miR-548a-3p   | 2.19427346   | -0.373730311 | 0.556842483 | -0.671159838 | 0.50211871   | 0.710922623 | hsa-miR-548a-3p   | 2.19427346   | -0.426122979 | 0.555240161 | -0.767457054  | 0.442809817  | 0.61524541   |
| hsa-miR-6888-5p   | 2.654833181  | 0.376588098  | 0.560640471 | 0.671710513  | 0.501768007  | 0.710922623 | hsa-miR-6888-5p   | 2.654833181  | 0.111082802  | 0.560189894 | 0.198294906   | 0.842814337  | 0.919756657  |
| hsa-miR-342-5p    | 37.39949307  | -0.170600383 | 0.554241995 | -0.661631051 | 0.508207703  | 0.714160261 | hsa-miR-342-5p    | 37.39949307  | 0.05943347   | 0.554436943 | 0.09907964    | 0.921074956  | 0.965780246  |
| hsa-miR-500b-5p   | 3.627693299  | 0.353452434  | 0.540578565 | 0.653841008  | 0.513314243  | 0.714160261 | hsa-miR-500b-5p   | 3.627693299  | -1.103986079 | 0.278878052 | -3.958669644  | 7.54E-05     | 0.000401104  |
| hsa-miR-548a-5p   | 15.46047528  | -0.194329633 | 0.296745146 | -0.654870471 | 0.512551154  | 0.714160261 | hsa-miR-548a-5p   | 15.46047528  | -0.483424884 | 0.313884423 | -1.54013659   | 0.123527062  | 0.251917395  |
| hsa-miR-7706      | 939.5971358  | -0.104700105 | 0.159911075 | -0.654739259 | 0.512633369  | 0.719161027 | hsa-miR-7706      | 939.5971358  | 0.1463345734 | 0.160028397 | 0.904498853   | 0.360452908  | 0.535766088  |
| hsa-miR-4677-5p   | 7.09014178   | -0.299446376 | 0.455185395 | -0.646909729 | 0.517693369  | 0.719161027 | hsa-miR-4677-5p   | 7.09014178   | -0.451154836 | 0.464878041 | -0.970479989  | 0.331807295  | 0.505223303  |
| hsa-miR-450a-2-3p | 4.599878703  | 0.329496759  | 0.514822875 | 0.640019655  | 0.522159821  | 0.721878777 | hsa-miR-450a-2-3p | 4.599878703  | -0.087574098 | 0.523882335 | -0.167163678  | 0.867241263  | 0.929433395  |
| hsa-miR-6733-5p   | 3.08771289   | 0.35784034   | 0.559051082 | 0.640085523  | 0.522117191  | 0.721878777 | hsa-miR-6733-5p   | 3.08771289   | 0.957074457  | 0.558553705 | 1.713486901   | 0.086623001  | 0.188532414  |

|                                         |             |              |              |               |              |              |                                         |             |               |              |              |             |             |
|-----------------------------------------|-------------|--------------|--------------|---------------|--------------|--------------|-----------------------------------------|-------------|---------------|--------------|--------------|-------------|-------------|
| hsa-miR-760                             | 1.308464607 | 0.222692765  | 0.348295459  | 0.639380564   | 0.52257539   | 0.721878777  | hsa-miR-760                             | 1.308464607 | 0.302716706   | 0.347350559  | 0.871501747  | 0.383480253 | 0.560083    |
| hsa-miR-5581-3p                         | 2.463456673 | -0.351820062 | 0.553399215  | -0.653575173  | 0.5254938242 | 0.724821958  | hsa-miR-5581-3p                         | 2.463456673 | 0.18646399    | 0.522317421  | 0.937602949  | 0.76566292  | 0.839368135 |
| hsa-miR-4742-3p                         | 4.41396884  | -0.330959999 | 0.527008845  | -0.634038558  | 0.526055642  | 0.724043857  | hsa-miR-4742-3p                         | 4.41396884  | -0.481016584  | 0.5527157567 | -0.912472122 | 0.361520228 | 0.538124953 |
| hsa-miR-1255b-5p                        | 1.621479499 | -0.322737242 | 0.512546661  | -0.629679436  | 0.528907657  | 0.726648088  | hsa-miR-1255b-5p                        | 1.621479499 | -0.643782036  | 0.506938762  | -1.26940442  | 0.204105846 | 0.36515305  |
| hsa-miR-301b-5p                         | 1.404015903 | 0.325759206  | 0.520102249  | 0.626633853   | 0.531094019  | 0.728330022  | hsa-miR-301b-5p                         | 1.404015903 | -0.61920134   | 0.507378424  | -1.220393518 | 0.222315733 | 0.388362783 |
| hsa-lef-7d-5p                           | 2.122461421 | -0.070998743 | 0.115040059  | -0.617165392  | 0.537125541  | 0.731841001  | hsa-lef-7d-5p                           | 2.122461421 | 0.048705977   | 0.115055916  | 0.026324467  | 0.672058501 | 0.384310042 |
| hsa-miR-1286                            | 16.81589299 | 0.222562417  | 0.359474225  | 0.619691907   | 0.535460545  | 0.731841001  | hsa-miR-1286                            | 16.81589299 | 0.138178936   | 0.368178936  | 0.436785465  | 0.970650062 | 0.984500929 |
| hsa-miR-2114-3p                         | 1.527087014 | 0.339790566  | 0.548321774  | 0.619691907   | 0.535460545  | 0.731841001  | hsa-miR-2114-3p                         | 1.527087014 | 0.952497663   | 0.549748444  | 1.732606381  | 0.083165654 | 0.184101748 |
| hsa-miR-548a-5p                         | 3.502345494 | -0.308346666 | 0.500103551  | -0.61655564   | 0.537521264  | 0.731841001  | hsa-miR-548a-5p                         | 3.502345494 | -0.861814624  | 0.518721558  | -1.661420486 | 0.096629026 | 0.206265806 |
| hsa-miR-4424                            | 5.511707637 | 0.284334666  | 0.465872832  | 0.6103926781  | 0.54164536   | 0.73421839   | hsa-miR-4424                            | 5.511707637 | 0.190333813   | 0.474568036  | 0.401067494  | 0.688370423 | 0.812862957 |
| hsa-miR-4717-3p                         | 4.483325219 | 0.29878121   | 0.491804888  | 0.607519807   | 0.533506002  | 0.73421839   | hsa-miR-4717-3p                         | 4.483325219 | 0.361020937   | 0.509352219  | -0.708784459 | 0.478485243 | 0.641075661 |
| hsa-miR-548b                            | 2.743634373 | -0.326430151 | 0.536430288  | -0.608522969  | 0.542840677  | 0.73421839   | hsa-miR-548b                            | 2.743634373 | -0.710755122  | 0.545007987  | -1.304137073 | 0.192186851 | 0.351362783 |
| hsa-miR-6820-5p                         | 1.638430235 | 0.301909958  | 0.4932360326 | 0.612069413   | 0.540491834  | 0.73421839   | hsa-miR-6820-5p                         | 1.638430235 | 0.239866091   | 0.490587624  | 0.488925891  | 0.624894155 | 0.771928086 |
| hsa-miR-584-3p                          | 1.639212938 | -0.313139322 | 0.51903435   | -0.603311364  | 0.546301574  | 0.735854612  | hsa-miR-584-3p                          | 1.639212938 | -0.012432184  | 0.51852818   | -0.023975908 | 0.980871825 | 0.987224622 |
| hsa-miR-186-3p                          | 12.02411282 | -0.244662121 | 0.406908392  | -0.601270768  | 0.547659656  | 0.73637364   | hsa-miR-186-3p                          | 12.02411282 | -0.438177986  | 0.416243022  | -1.052697494 | 0.292479658 | 0.473892861 |
| hsa-miR-29b-1-5p                        | 35.63978409 | 0.160590931  | 0.270628422  | 0.593400094   | 0.552913426  | 0.738536943  | hsa-miR-29b-1-5p                        | 35.63978409 | 0.90926545    | 0.266110409  | 3.416877033  | 0.000633439 | 0.002780689 |
| hsa-miR-16-1-3p                         | 20.16196415 | 0.197884092  | 0.331245372  | 0.597394284   | 0.550244169  | 0.738536943  | hsa-miR-16-1-3p                         | 20.16196415 | 0.36283444    | 0.334247953  | 1.084175497  | 0.278286994 | 0.458112776 |
| hsa-miR-597-3p                          | 2.806557527 | 0.328261899  | 0.557953756  | -0.591844798  | 0.553954522  | 0.739583021  | hsa-miR-597-3p                          | 2.806557527 | -0.101942509  | 0.554387221  | -1.823531406 | 0.068222945 | 0.15776556  |
| hsa-miR-3144-3p                         | 2.94936137  | -0.338261899 | 0.554304679  | -0.592294814  | 0.553713446  | 0.739583021  | hsa-miR-3144-3p                         | 2.94936137  | -0.115856037  | 0.551511576  | -1.36398567  | 0.172572076 | 0.324669499 |
| hsa-miR-548a-3p                         | 10.67240605 | -0.242233497 | 0.411801478  | -0.588236105  | 0.556573326  | 0.741505258  | hsa-miR-548a-3p                         | 10.67240605 | -0.115856037  | 0.416071262  | -0.278452389 | 0.780665108 | 0.875291182 |
| hsa-miR-1296-3p                         | 1.0213374   | 0.276297649  | 0.471414205  | 0.58569751    | 0.558078807  | 0.742470399  | hsa-miR-1296-3p                         | 1.0213374   | -0.408380465  | 0.460850022  | -0.88616133  | 0.375538786 | 0.552639464 |
| hsa-miR-296-3p                          | 33.49191692 | 0.15576872   | 0.267449664  | 0.58242257    | 0.560282083  | 0.746093924  | hsa-miR-296-3p                          | 33.49191692 | 2.0354488102  | 0.244343541  | 8.382876523  | 8.177-17    | 1.59E-15    |
| hsa-miR-6513-5p                         | 2.790122307 | -0.323679819 | 0.560522897  | -0.577460477  | 0.56362843   | 0.746990734  | hsa-miR-6513-5p                         | 2.790122307 | 0.259144847   | 0.560036445  | 0.462233349  | 0.643913299 | 0.781751829 |
| hsa-miR-653-5p                          | 46.80474327 | 0.152596757  | 0.26476099   | 0.57635665    | 0.564374139  | 0.746990734  | hsa-miR-653-5p                          | 46.80474327 | 1.90811242    | 0.250046539  | 7.63102911   | 2.33E-13    | 3.62E-13    |
| hsa-miR-548a-3p/548a-5p/548b-5p         | 5.555202976 | 0.296318945  | 0.526120113  | 0.563215392   | 0.573288223  | 0.757380777  | hsa-miR-548a-3p/548a-5p/548b-5p         | 5.555202976 | 0.526678341   | 0.527215095  | 0.998981908  | 0.317803456 | 0.499623304 |
| hsa-miR-941                             | 1.767373707 | 0.258779581  | 0.461317517  | 0.560959769   | 0.574826421  | 0.758089897  | hsa-miR-6511b-5p                        | 1.767373707 | 0.157630469   | 0.458951427  | 0.343457846  | 0.731254008 | 0.839267994 |
| hsa-miR-6884-5p                         | 3.685046886 | 0.090586766  | 0.161924639  | 0.559437812   | 0.575862962  | 0.758156108  | hsa-miR-941                             | 3.685046886 | 0.738990534   | 0.161860966  | 4.565588303  | 4.98E-06    | 3.12E-05    |
| hsa-miR-3648                            | 7.308566422 | -0.249039019 | 0.448942997  | -0.544723029  | 0.579084122  | 0.761053265  | hsa-miR-3648                            | 7.308566422 | 0.113421495   | 0.449088278  | 0.252559465  | 0.800608657 | 0.890635311 |
| hsa-miR-6884-5p                         | 1.433210879 | -0.253611794 | 0.458490371  | -0.553145302  | 0.580163918  | 0.761150929  | hsa-miR-6884-5p                         | 1.433210879 | -0.015604434  | 0.457396511  | -0.034115771 | 0.972784833 | 0.984500929 |
| hsa-miR-2682-5p                         | 1305.705778 | -0.042420262 | 0.077036087  | -0.550654416  | 0.581870599  | 0.762069279  | hsa-miR-2682-5p                         | 1305.705778 | 1.2293005578  | 0.075664016  | 16.24869845  | 2.35E-59    | 3.04E-57    |
| hsa-miR-304-5p                          | 30.36590974 | 0.126463848  | 0.235020946  | 0.538096071   | 0.590510725  | 0.766906229  | hsa-miR-304-5p                          | 30.36590974 | 0.603114969   | 0.233170493  | 2.586583578  | 0.009693266 | 0.030247661 |
| hsa-miR-365a-3p                         | 62484.51138 | 0.048094957  | 0.089720658  | 0.536052207   | 0.59192247   | 0.766906229  | hsa-miR-304-5p                          | 62484.51138 | 0.22686847    | 0.089725857  | 2.529777675  | 0.011413482 | 0.034644702 |
| hsa-miR-4515                            | 32.56640855 | -0.150223693 | 0.277647514  | -0.541059026  | 0.588466899  | 0.766906229  | hsa-miR-365a-3p                         | 32.56640855 | 0.040671417   | 0.2800483    | 0.145230008  | 0.884529274 | 0.941478419 |
| hsa-miR-548a-5p/548c-5p/548b-5p/548m-5p | 27.49592772 | -0.126622142 | 0.224499881  | -0.539113886  | 0.589808275  | 0.766906229  | hsa-miR-548a-5p/548c-5p/548b-5p/548m-5p | 27.49592772 | -0.101874338  | 0.241554316  | -0.421745052 | 0.673211116 | 0.803510042 |
| hsa-miR-586                             | 3.614306477 | -0.270382465 | 0.505395365  | -0.534991973  | 0.5925585408 | 0.766906229  | hsa-miR-586                             | 3.614306477 | -0.10129193   | 0.530567282  | -2.452663426 | 0.014180295 | 0.041893874 |
| hsa-miR-624-3p                          | 13.08814081 | 0.180089465  | 0.332116633  | 0.542248094   | 0.587647608  | 0.766906229  | hsa-miR-624-3p                          | 13.08814081 | 0.129651297   | 0.341542857  | 0.379604768  | 0.704238821 | 0.828284654 |
| hsa-lef-7l-5p                           | 228249.3612 | -0.053372336 | 0.100977444  | -0.528572018  | 0.597112784  | 0.771355593  | hsa-lef-7l-5p                           | 228249.3612 | -0.295560557  | 0.10098178   | -2.926870156 | 0.003423918 | 0.012147873 |
| hsa-miR-4795-5p                         | 1.483968256 | -0.286151608 | 0.38293975   | -0.527043153  | 0.598163822  | 0.771396698  | hsa-miR-4795-5p                         | 1.483968256 | 0.082662846   | 0.542856508  | 0.152273841  | 0.878970956 | 0.938132463 |
| hsa-miR-6738-3p                         | 0.997512137 | -0.200933852 | 0.38293975   | -0.524710364  | 0.598493855  | 0.7729150713 | hsa-miR-6738-3p                         | 0.997512137 | 0.260333317   | 0.383494819  | 0.678489685  | 0.497273109 | 0.653722717 |
| hsa-miR-10a-5p                          | 1003060.313 | -0.046832603 | 0.089906943  | -0.5229090848 | 0.602430848  | 0.7729150713 | hsa-miR-10a-5p                          | 1003060.313 | 0.276908517   | 0.089907024  | 3.079944217  | 0.002070394 | 0.007771478 |
| hsa-miR-937-3p                          | 5.8417286   | -0.273638378 | 0.523979746  | -0.52223083   | 0.601509623  | 0.7729150713 | hsa-miR-937-3p                          | 5.8417286   | -0.615192773  | 0.530141929  | -1.160430329 | 0.242873664 | 0.420828648 |
| hsa-miR-581                             | 1.407121317 | -0.261937703 | 0.504975691  | -0.51871349   | 0.603960553  | 0.773600911  | hsa-miR-581                             | 1.407121317 | -0.5328480722 | 0.499324265  | -1.067123629 | 0.285916013 | 0.465737405 |
| hsa-miR-1910-5p                         | 40.18694304 | -0.130020739 | 0.251445446  | -0.517092314  | 0.605019017  | 0.7737396771 | hsa-miR-1910-5p                         | 40.18694304 | -1.467104451  | 0.279076749  | -5.256992927 | 1.46E-07    | 1.18E-06    |
| hsa-miR-513a-5p                         | 1.589797731 | -0.266620644 | 0.517201541  | -0.554968283  | 0.606199128  | 0.7737396771 | hsa-miR-513a-5p                         | 1.589797731 | -0.288446103  | 0.514217042  | -0.560942326 | 0.574838855 | 0.725078305 |
| hsa-miR-548a1                           | 8.750650414 | -0.214464511 | 0.424695129  | -0.504984626  | 0.613366934  | 0.780625568  | hsa-miR-548a1                           | 8.750650414 | -0.505532815  | 0.437671491  | -1.155705822 | 0.248069615 | 0.422697568 |
| hsa-miR-618                             | 5.669781141 | -0.213856997 | 0.42336455   | -0.50513676   | 0.613462784  | 0.780625568  | hsa-miR-618                             | 5.669781141 | -0.154903356  | 0.4323393705 | -0.358246094 | 0.720159155 | 0.829478067 |

|                           |              |              |             |               |             |             |                           |              |               |              |              |              |             |
|---------------------------|--------------|--------------|-------------|---------------|-------------|-------------|---------------------------|--------------|---------------|--------------|--------------|--------------|-------------|
| hsa-mir-6516-3p           | 3.62787042   | 0.275471384  | 0.549260977 | 0.501530959   | 0.615997495 | 0.782399505 | hsa-mir-6516-3p           | 3.62787042   | 0.102372      | 0.551980568  | 0.18546305   | 0.852865859  | 0.92472933  |
| hsa-mir-1256              | 3.278080976  | 0.265968806  | 0.547466552 | 0.48551308    | 0.627099189 | 0.792510995 | hsa-mir-1256              | 3.278080976  | -0.374366186  | 0.53493482   | -0.676614127 | 0.496650814  | 0.65437193  |
| hsa-mir-197-3p            | 14.34170779  | 0.170933431  | 0.350977151 | 0.487020703   | 0.62624366  | 0.792510995 | hsa-mir-197-3p            | 14.34170779  | 0.876662610   | 0.544784106  | 2.544756565  | 0.011005109  | 0.533332133 |
| hsa-mir-3664-3p           | 4.76335416   | 0.239236385  | 0.49208817  | 0.48616569    | 0.626849695 | 0.792510995 | hsa-mir-3664-3p           | 4.76335416   | 0.027308234   | 0.501409564  | 0.054462929  | 0.956566343  | 0.982381261 |
| hsa-mir-499a-5p           | 5.173409621  | -0.220249085 | 0.45951335  | -0.483059392  | 0.629057443 | 0.793660807 | hsa-mir-499a-5p           | 5.173409621  | -0.74667277   | 0.477773601  | -1.562817134 | 0.118095613  | 0.2439807   |
| hsa-mir-636               | 3.058711433  | 0.263404971  | 0.559502086 | 0.462084631   | 0.637794556 | 0.803345223 | hsa-mir-636               | 3.058711433  | 0.257547333   | 0.560001995  | 0.459904357  | 0.645584904  | 0.88251676  |
| hsa-mir-204-5p            | 1.188811962  | 0.24617639   | 0.532749798 | 0.462084631   | 0.640794666 | 0.804492963 | hsa-mir-204-5p            | 1.188811962  | -0.32970047   | 0.523380722  | -0.629994387 | 0.528731317  | 0.782432282 |
| hsa-mir-3125              | 1.322495903  | -0.257003502 | 0.549971174 | -0.467203587  | 0.640482691 | 0.804492963 | hsa-mir-3125              | 1.322495903  | -0.702273257  | 0.542656373  | -1.294199888 | 0.19561106   | 0.35595896  |
| hsa-mir-3134              | 1.683305566  | -0.257061867 | 0.551975143 | -0.465712759  | 0.641421118 | 0.804492963 | hsa-mir-3134              | 1.683305566  | -0.593913079  | 0.547434509  | -1.084900252 | 0.277964882  | 0.458112276 |
| hsa-mir-4714-3p           | 1.044368183  | 0.211337742  | 0.45577949  | 0.46371948    | 0.642811144 | 0.804492963 | hsa-mir-4714-3p           | 1.044368183  | 0.030128716   | 0.451183865  | 0.066777025  | 0.946759214  | 0.978972542 |
| hsa-mir-5001-3p           | 8.84903681   | 0.226281197  | 0.489685677 | 0.462094783   | 0.644013351 | 0.804492963 | hsa-mir-5001-3p           | 8.84903681   | -0.977255975  | 0.506302015  | -1.930183854 | 0.035354061  | 0.12930067  |
| hsa-mir-597-5p            | 4.176649808  | 0.243875552  | 0.532905153 | 0.457634066   | 0.647215565 | 0.805825709 | hsa-mir-597-5p            | 4.176649808  | 0.202622639   | 0.536398308  | 0.377746603  | 0.705618844  | 0.823212985 |
| hsa-mir-597-3p            | 1.720414449  | -0.240147098 | 0.523143568 | -0.459046259  | 0.646200948 | 0.805825709 | hsa-mir-597-3p            | 1.720414449  | -0.414450492  | 0.519213254  | -0.798227874 | 0.424738265  | 0.60039331  |
| hsa-mir-3620-5p           | 6.704581558  | -0.204464296 | 0.450939946 | -0.453418621  | 0.65024733  | 0.806946277 | hsa-mir-3620-5p           | 6.704581558  | 0.211628948   | 0.450032981  | 0.470252086  | 0.638174925  | 0.778980164 |
| hsa-mir-652-5p            | 7.376647795  | 0.229181018  | 0.50471879  | 0.454076652   | 0.649773658 | 0.806946277 | hsa-mir-652-5p            | 7.376647795  | -0.095806054  | 0.510987084  | -0.187492517 | 0.851274491  | 0.92472933  |
| hsa-mir-887-5p            | 1.65164591   | -0.245297006 | 0.547800732 | -0.44777851   | 0.654308298 | 0.810656926 | hsa-mir-887-5p            | 1.65164591   | -1.133052004  | 0.536594176  | -2.111562246 | 0.034724014  | 0.087599216 |
| hsa-mir-1972              | 14.10453224  | 0.143397932  | 0.324549369 | 0.441837038   | 0.658607135 | 0.814259155 | hsa-mir-1972              | 14.10453224  | 0.665438716   | 0.321213041  | 2.0716429    | 0.038298756  | 0.095378633 |
| hsa-mir-304-3p            | 11.41.1824   | 0.044319904  | 0.100605777 | 0.440530204   | 0.659552992 | 0.814259155 | hsa-mir-304-3p            | 11.41.1824   | -0.268245312  | 0.101558126  | -2.641298874 | 0.008258895  | 0.026582616 |
| hsa-mir-3177-5p           | 0.981519606  | -0.202617586 | 0.46152089  | -0.43930204   | 0.660442697 | 0.814259155 | hsa-mir-3177-5p           | 0.981519606  | -0.37325371   | 0.45655195   | -0.738854299 | 0.459995476  | 0.627702822 |
| hsa-mir-4766-3p           | 6.319221335  | 0.201617586  | 0.460722874 | -0.437611409  | 0.661668    | 0.814443375 | hsa-mir-4766-3p           | 6.319221335  | -0.2491281684 | 0.46863172   | -0.53193515  | 0.594770911  | 0.741792934 |
| hsa-mir-1307-3p           | 9.41.2984689 | -0.061954363 | 0.142486971 | -0.434807214  | 0.663702368 | 0.815621254 | hsa-mir-1307-3p           | 9.41.2984689 | -0.24383133   | 0.143129239  | -1.703574555 | 0.088460598  | 0.191495929 |
| hsa-mir-3684              | 13.32133421  | -0.143025282 | 0.331356445 | -0.431653734  | 0.666006183 | 0.816600059 | hsa-mir-3684              | 13.32133421  | -0.444788359  | 0.347584904  | -1.279654864 | 0.200666721  | 0.361758799 |
| hsa-mir-548a-3p           | 2.195047171  | -0.221181155 | 0.515116446 | -0.430285882  | 0.667073955 | 0.816600059 | hsa-mir-548a-3p           | 2.195047171  | -0.129307573  | 0.513617495  | -0.251758201 | 0.801227905  | 0.890635311 |
| hsa-mir-766-5p            | 2.196689126  | 0.240237204  | 0.558483255 | -0.429160084  | 0.667073955 | 0.816600059 | hsa-mir-766-5p            | 2.196689126  | -1.32949593   | 0.557003749  | -2.37876802  | 0.017372584  | 0.04962683  |
| hsa-mir-125b-5p           | 8797.610224  | -0.064970749 | 0.152974714 | -0.4247415612 | 0.671044001 | 0.819330709 | hsa-mir-125b-5p           | 8797.610224  | -0.061387315  | 0.153015869  | -0.401182622 | 0.688828567  | 0.812862957 |
| hsa-mir-3609              | 1.333303309  | -0.203070268 | 0.485487597 | -0.418281063  | 0.675741634 | 0.82373014  | hsa-mir-3609              | 1.333303309  | -0.720731221  | 0.4777192452 | -1.510357546 | 0.130952215  | 0.259565998 |
| hsa-mir-4522              | 3.234193428  | 0.2325201457 | 0.559436273 | 0.401155456   | 0.687703065 | 0.824792958 | hsa-mir-4522              | 3.234193428  | -0.347831512  | 0.560340921  | -0.620749795 | 0.534764262  | 0.687252117 |
| hsa-mir-1304-5p           | 7.260276729  | -0.193093834 | 0.474297478 | -0.407151995  | 0.683923192 | 0.831027057 | hsa-mir-1304-5p           | 7.260276729  | -0.227226974  | 0.480141391  | -0.473250125 | 0.63603474   | 0.778980164 |
| hsa-mir-944               | 4.614172068  | -0.22999959  | 0.553730918 | -0.404527763  | 0.685826466 | 0.832002039 | hsa-mir-944               | 4.614172068  | -0.54496109   | 0.555819587  | -0.980463969 | 0.326857137  | 0.505912341 |
| hsa-mir-105-3p            | 9.875193962  | 0.152457338  | 0.381379337 | 0.399752486   | 0.68933883  | 0.833133557 | hsa-mir-105-3p            | 9.875193962  | -0.631986929  | 0.407886408  | -1.549418948 | 0.1121281042 | 0.248642136 |
| hsa-mir-15a-3p            | 2.11575142   | -0.21651761  | 0.54498566  | -0.39728179   | 0.691159674 | 0.833133557 | hsa-mir-15a-3p            | 2.11575142   | -1.701801411  | 0.55595483   | -3.063022404 | 0.002191137  | 0.008145996 |
| hsa-mir-3165              | 1.82501422   | 0.209011834  | 0.523383568 | 0.39902678    | 0.690891231 | 0.833133557 | hsa-mir-3165              | 1.82501422   | -0.015063715  | 0.520203493  | -0.028957351 | 0.976896605  | 0.984500929 |
| hsa-mir-5695              | 2.279318859  | 0.222322776  | 0.557734367 | 0.398617673   | 0.690174937 | 0.833133557 | hsa-mir-5695              | 2.279318859  | -0.036623516  | 0.555919981  | -0.065879114 | 0.947474069  | 0.978972542 |
| hsa-mir-144-5p            | 4.486693719  | 0.212294255  | 0.546038103 | 0.388790184   | 0.697431363 | 0.839356982 | hsa-mir-144-5p            | 4.486693719  | 1.79721126    | 0.53676055   | 3.348255119  | 0.000813221  | 0.003471829 |
| hsa-mir-1273g-3p          | 26.57540281  | 0.10620002   | 0.281903317 | 0.376724973   | 0.706378002 | 0.848774838 | hsa-mir-1273g-3p          | 26.57540281  | 0.985993221   | 0.274094083  | 3.597280211  | 0.000321562  | 0.001523498 |
| hsa-mir-148b-5p           | 1507.447576  | -0.038554288 | 0.103751254 | -0.371603099  | 0.710188382 | 0.849309012 | hsa-mir-148b-5p           | 1507.447576  | 0.411984041   | 0.103675633  | 3.973778896  | 7.07E-05     | 0.000381708 |
| hsa-mir-548a-p-5p/548l-5p | 3.815713509  | 0.192150406  | 0.517047929 | 0.371629777   | 0.710168516 | 0.849309012 | hsa-mir-548a-p-5p/548l-5p | 3.815713509  | 0.006569355   | 0.524491265  | 0.012525538  | 0.990006328  | 0.995129259 |
| hsa-mir-6847-5p           | 2.170599426  | -0.202711156 | 0.545380647 | -0.3716888217 | 0.710124999 | 0.849309012 | hsa-mir-6847-5p           | 2.170599426  | -0.216808129  | 0.543485205  | -0.389821993 | 0.668995683  | 0.821496888 |
| hsa-mir-4745-5p           | 2.548234035  | -0.20669038  | 0.559769189 | -0.369242153  | 0.711904768 | 0.850069940 | hsa-mir-4745-5p           | 2.548234035  | -0.811767578  | 0.557239312  | -1.456766577 | 0.145180839  | 0.282013779 |
| hsa-le1-7b-5p             | 11676.72235  | -0.072060729 | 0.197928015 | -0.364075438  | 0.711580173 | 0.850666578 | hsa-le1-7b-5p             | 11676.72235  | 0.129895273   | 0.197938245  | 0.656241409  | 0.511666890  | 0.662611108 |
| hsa-mir-3136-5p           | 7.644698108  | -0.180080116 | 0.491960437 | -0.366045931  | 0.714330802 | 0.850646578 | hsa-mir-3136-5p           | 7.644698108  | -1.155441797  | 0.50848469   | -2.272323669 | 0.023066968  | 0.064010837 |
| hsa-mir-652-3p            | 107.0705776  | 0.055643586  | 0.152276662 | 0.3664239085  | 0.715679483 | 0.850646578 | hsa-mir-652-3p            | 107.0705776  | 0.085251421   | 0.155763383  | 0.5473133619 | 0.584163289  | 0.730909623 |
| hsa-mir-766-3p            | 1.366162791  | 0.177660363  | 0.493498971 | 0.3570001681  | 0.723358067 | 0.852925528 | hsa-mir-766-3p            | 1.366162791  | 0.363509367   | 0.492108808  | -0.728665437 | 0.1460110178 | 0.627202822 |
| hsa-mir-219a-5p           | 5.168665473  | 0.160843726  | 0.454689831 | 0.353743838   | 0.728330866 | 0.857140635 | hsa-mir-219a-5p           | 5.168665473  | -0.727895905  | 0.47743255   | -1.52460469  | 0.127357727  | 0.256365165 |
| hsa-mir-548a1             | 1.971965124  | 0.194938552  | 0.554810421 | 0.351360654   | 0.725317796 | 0.857914956 | hsa-mir-548a1             | 1.971965124  | -0.370330515  | 0.558743622  | -0.662898869 | 0.507393326  | 0.660378842 |
| hsa-mir-105-5p            | 28.51925601  | 0.10315285   | 0.30419875  | 0.339110267   | 0.734526664 | 0.858312566 | hsa-mir-105-5p            | 28.51925601  | -0.226029388  | 0.31327086   | -0.721514245 | 0.470593179  | 0.637022474 |
| hsa-mir-1291              | 1.167847229  | 0.163571426  | 0.487053133 | 0.333838978   | 0.736992929 | 0.858312566 | hsa-mir-1291              | 1.167847229  | 0.026646524   | 0.482675115  | 0.055197633  | 0.955981015  | 0.983281261 |
| hsa-mir-3195              | 22.08627871  | -0.189867147 | 0.550680451 | -0.3370318852 | 0.736092889 | 0.858312566 | hsa-mir-3195              | 22.08627871  | -0.090296863  | 0.560679372  | -0.161000643 | 0.872092973  | 0.393355702 |
| hsa-mir-3199              | 2.485033691  | 0.193035465  | 0.559534795 | 0.344929781   | 0.730097998 | 0.858312566 | hsa-mir-3199              | 2.485033691  | -0.344116475  | 0.557480774  | -0.611996645 | 0.540539845  | 0.691926622 |
| hsa-mir-4508              | 1.17637872   | 0.174722786  | 0.507541987 | 0.34425484    | 0.730654643 | 0.858312566 | hsa-mir-4508              | 1.17637872   | -0.610969381  | 0.494748785  | -1.2349083   | 0.216864634  | 0.382094831 |

|                  |              |              |              |              |              |             |                  |              |              |             |              |             |              |
|------------------|--------------|--------------|--------------|--------------|--------------|-------------|------------------|--------------|--------------|-------------|--------------|-------------|--------------|
| hsa-miR-4521     | 42.94799576  | -0.088497954 | 0.2624913    | -0.337146236 | 0.736006664  | 0.858312566 | hsa-miR-4521     | 42.94799576  | 0.565010692  | 0.259421015 | 2.177968088  | 0.029408413 | 0.07693716   |
| hsa-miR-4742-5p  | 0.942982     | -0.142384312 | 0.416271546  | -0.29382577  | 0.732315742  | 0.858312566 | hsa-miR-4742-5p  | 0.942982     | -0.255092286 | 0.412553217 | -0.61832577  | 0.536366616 | 0.887709901  |
| hsa-miR-5488e-5p | 5.3606503    | 0.149366276  | 0.427879057  | -0.34908527  | 0.727025259  | 0.858312566 | hsa-miR-5488e-5p | 5.3606503    | 0.184917777  | 0.437103739 | -0.42305238  | 0.672257045 | 0.803510042  |
| hsa-miR-6764-3p  | 4.761876912  | 0.177479078  | 0.522469005  | 0.339693027  | 0.734087714  | 0.858312566 | hsa-miR-6764-3p  | 4.761876912  | -0.058143364 | 0.528411777 | -0.11003069  | 0.912383149 | 0.960683004  |
| hsa-miR-744-5p   | 2997.721611  | 0.040254769  | 0.118695898  | 0.339142044  | 0.734502727  | 0.858312566 | hsa-miR-744-5p   | 2997.721611  | -0.417321532 | 0.119075588 | -3.504677482 | 0.000457161 | 0.002090734  |
| hsa-miR-1276     | 7.735264214  | -0.132224857 | 0.395942664  | -0.333005662 | 0.738417335  | 0.858561419 | hsa-miR-1276     | 7.735264214  | -0.867068315 | 0.42598878  | -2.035425238 | 0.041808104 | 0.103126657  |
| hsa-miR-155-3p   | 1.105138134  | 0.164291023  | 0.497766086  | -0.330056682 | 0.741357134  | 0.86074747  | hsa-miR-155-3p   | 1.105138134  | -0.204940672 | 0.49043952  | -0.417870129 | 0.676042073 | 0.805651366  |
| hsa-miR-4524a-5p | 1.9543887233 | -0.165164563 | 0.518572231  | -0.318498664 | 0.750106708  | 0.869574401 | hsa-miR-4524a-5p | 1.9543887233 | 0.235716572  | 0.518748977 | 1.342193815  | 0.179533161 | 0.334525818  |
| hsa-miR-127-3p   | 3.627710819  | 0.175163143  | 0.55660225   | 0.314700745  | 0.752988878  | 0.870248215 | hsa-miR-127-3p   | 3.627710819  | 1.189209178  | 0.554309249 | 2.1445389385 | 0.031921727 | 0.082479701  |
| hsa-miR-888-5p   | 13.67711471  | 0.108762434  | 0.345547446  | 0.314959325  | 0.762024092  | 0.870248215 | hsa-miR-888-5p   | 13.67711471  | 0.463923248  | 0.345645497 | 1.342193815  | 0.179533161 | 0.334525818  |
| hsa-miR-483-3p   | 221.007997   | 0.062072038  | 0.203405154  | 0.305164433  | 0.762024092  | 0.876910232 | hsa-miR-483-3p   | 221.007997   | 0.750152023  | 0.202482446 | 3.704775595  | 0.000211578 | 0.001053821  |
| hsa-miR-532-3p   | 7.320739278  | -0.123094468 | 0.40692424   | -0.302499718 | 0.762271148  | 0.876910232 | hsa-miR-532-3p   | 7.320739278  | 0.147652291  | 0.409445084 | 0.360615616  | 0.718386814 | 0.829400527  |
| hsa-miR-642a-5p  | 54.0937124   | -0.062150304 | 0.208363915  | -0.298278617 | 0.765490523  | 0.877994433 | hsa-miR-642a-5p  | 54.0937124   | 0.029690995  | 0.203987422 | 3.317776516  | 0.000907371 | 0.003810956  |
| hsa-miR-29c-5p   | 1.847519435  | -0.13562594  | 0.461747763  | -0.293723321 | 0.768969332  | 0.880652003 | hsa-miR-29c-5p   | 1.847519435  | -0.67684677  | 0.203987422 | 3.317776516  | 0.000907371 | 0.003810956  |
| hsa-miR-5488q-5p | 81.33469161  | 0.059753214  | 0.20972336   | 0.284914444  | 0.77570969   | 0.880678358 | hsa-miR-5488q-5p | 81.33469161  | -0.171499304 | 0.459656214 | -0.373103417 | 0.709071476 | 0.8260098    |
| hsa-miR-133a-3p  | 1.544258749  | -0.153044721 | 0.525105462  | -0.291455207 | 0.770703197  | 0.880678358 | hsa-miR-133a-3p  | 1.544258749  | 0.454512324  | 0.526892854 | 0.862627611  | 0.388342245 | 0.560858595  |
| hsa-miR-2110     | 1.662989327  | 0.157779121  | 0.546273931  | 0.288827843  | 0.772713124  | 0.880678358 | hsa-miR-2110     | 1.662989327  | -0.414555174 | 0.539831584 | -0.767905821 | 0.442543139 | 0.61524541   |
| hsa-miR-3928-3p  | 38.67603245  | -0.070173959 | 0.24791965   | -0.28305122  | 0.777137574  | 0.880678358 | hsa-miR-3928-3p  | 38.67603245  | -0.426230249 | 0.25803644  | -1.651821925 | 0.098570858 | 0.2092761083 |
| hsa-miR-4523     | 1.691120756  | -0.157125997 | 0.550844338  | -0.285245629 | 0.775455956  | 0.880678358 | hsa-miR-4523     | 1.691120756  | 0.62521693   | 0.543889738 | -1.141415665 | 0.256969989 | 0.428527305  |
| hsa-miR-5582-3p  | 1.182497136  | -0.147930738 | 0.520362381  | -0.284284075 | 0.776192689  | 0.880678358 | hsa-miR-5582-3p  | 1.182497136  | -0.047258232 | 0.517760061 | -0.091274387 | 0.922724559 | 0.968403683  |
| hsa-miR-6699-5p  | 9.57072421   | 0.143414511  | 0.495822188  | 0.2892455    | 0.772393315  | 0.880678358 | hsa-miR-6699-5p  | 9.57072421   | 0.144309217  | 0.498752991 | 0.289340053  | 0.777321165 | 0.87349861   |
| hsa-miR-1287-5p  | 66.77072978  | 0.047678804  | 0.171202817  | 0.278493105  | 0.780633857  | 0.883318132 | hsa-miR-1287-5p  | 66.77072978  | 0.730119916  | 0.167443702 | 4.360748762  | 1.30E-05    | 7.87E-05     |
| hsa-miR-185-5p   | 4.385290094  | -0.137242406 | 0.509915297  | -0.269147458 | 0.787816211  | 0.886146912 | hsa-miR-185-5p   | 4.385290094  | -0.017238285 | 0.513411978 | -0.033575931 | 0.973215316 | 0.984500929  |
| hsa-miR-1976     | 2.0783674    | -0.134105116 | 0.491353206  | -0.272930173 | 0.78490692   | 0.886146912 | hsa-miR-1976     | 2.0783674    | -0.022475505 | 0.490016259 | -0.045866856 | 0.966416371 | 0.982381261  |
| hsa-miR-542-5p   | 25.57429884  | 0.065068332  | 0.239095014  | 0.272144247  | 0.785511109  | 0.886146912 | hsa-miR-542-5p   | 25.57429884  | 0.380147944  | 0.256411699 | -1.448789647 | 0.137818014 | 0.641103114  |
| hsa-miR-6755-5p  | 1.682419266  | -0.151639562 | 0.560601913  | -0.270494194 | 0.786780083  | 0.886146912 | hsa-miR-6755-5p  | 1.682419266  | -0.397313458 | 0.559882418 | -0.709669467 | 0.477909191 | 0.641075661  |
| hsa-miR-5488a-3p | 4.821285674  | 0.151959968  | 0.528315814  | 0.26410279   | 0.791700714  | 0.889195016 | hsa-miR-5488a-3p | 4.821285674  | 0.375215623  | 0.52947479  | 0.708656257  | 0.478537816 | 0.641075661  |
| hsa-miR-1973     | 0.939013673  | 0.110820811  | 0.424749726  | 0.260908493  | 0.794163075  | 0.890639182 | hsa-miR-1973     | 0.939013673  | 0.482978706  | 0.424749747 | 1.137063998  | 0.255511533 | 0.430656097  |
| hsa-miR-3139     | 2.476218021  | -0.143060968 | 0.560615722  | -0.255185436 | 0.798579879  | 0.894267705 | hsa-miR-3139     | 2.476218021  | -0.3905294   | 0.560340842 | -0.696949734 | 0.485834252 | 0.647501224  |
| hsa-miR-1301-3p  | 30.43444713  | -0.071760152 | 0.283356122  | -0.253250757 | 0.800074446  | 0.894617955 | hsa-miR-1301-3p  | 30.43444713  | -0.010777495 | 0.287612656 | -0.037472257 | 0.97010846  | 0.984500929  |
| hsa-miR-1293     | 6.091823827  | -0.124772946 | 0.500860052  | -0.249117384 | 0.803269982  | 0.896364468 | hsa-miR-1293     | 6.091823827  | -0.117948245 | 0.505230582 | -0.233454287 | 0.815408662 | 0.905103615  |
| hsa-miR-4473     | 0.985130478  | -0.115150807 | 0.475730404  | -0.242050552 | 0.808740993  | 0.896364468 | hsa-miR-4473     | 0.985130478  | -0.617256959 | 0.465994326 | -1.324601876 | 0.185303233 | 0.341186285  |
| hsa-miR-5091     | 15.40977523  | 0.098552359  | 0.402404391  | 0.244908756  | 0.806527082  | 0.896364468 | hsa-miR-5091     | 15.40977523  | -0.158955231 | 0.410324326 | -0.387389247 | 0.699468063 | 0.81980315   |
| hsa-miR-5696     | 3.286059112  | 0.120775681  | 0.491235252  | 0.243861185  | 0.805789692  | 0.896364468 | hsa-miR-5696     | 3.286059112  | -0.108649618 | 0.504808243 | -0.215229485 | 0.829588404 | 0.910438122  |
| hsa-miR-6515-5p  | 7.824094845  | 0.098559281  | 0.399215098  | 0.246882648  | 0.804999046  | 0.896364468 | hsa-miR-6515-5p  | 7.824094845  | -0.120249454 | 0.413612464 | -0.290729764 | 0.771258006 | 0.87349861   |
| hsa-miR-92a-3p   | 2397.63.9351 | 0.037100113  | 0.152847049  | 0.242727047  | 0.808216853  | 0.896364468 | hsa-miR-92a-3p   | 2397.63.9351 | -0.305786541 | 0.152850073 | -2.000565228 | 0.045439264 | 0.111026126  |
| hsa-miR-5095     | 0.955194895  | -0.115853478 | 0.4853660966 | -0.2386955   | 0.811341706  | 0.897932269 | hsa-miR-5095     | 0.955194895  | -0.040578751 | 0.48218601  | -0.084155804 | 0.932932057 | 0.970397228  |
| hsa-miR-5144a-3p | 1.673735573  | 0.129538989  | 0.547181666  | 0.236738541  | 0.812859633  | 0.898298894 | hsa-miR-5144a-3p | 1.673735573  | -0.307758009 | 0.542046758 | -0.675754469 | 0.570210274 | 0.720417594  |
| hsa-miR-345-3p   | 1.461297321  | 0.118636125  | 0.458155112  | 0.234992115  | 0.814214853  | 0.898298894 | hsa-miR-345-3p   | 1.461297321  | -0.378556957 | 0.497865195 | -0.760384459 | 0.447024481 | 0.616941878  |
| hsa-miR-548d-3p  | 2.858379949  | 0.122324642  | 0.542945136  | 0.225293847  | 0.821471785  | 0.904330502 | hsa-miR-548d-3p  | 2.858379949  | 0.545819697  | 0.542444056 | 1.006223022  | 0.3143083   | 0.49637132   |
| hsa-miR-767-3p   | 7.328250041  | -0.1143293   | 0.507904347  | 0.225100061  | 0.821901434  | 0.904330502 | hsa-miR-767-3p   | 7.328250041  | -0.397223381 | 0.51575137  | -0.77018386  | 0.441190836 | 0.61524541   |
| hsa-miR-592      | 2.637423606  | 0.120773325  | 0.550673664  | 0.219318977  | 0.826401581  | 0.907925261 | hsa-miR-592      | 2.637423606  | -0.662415294 | 0.556686995 | -1.18992441  | 0.234076209 | 0.404171955  |
| hsa-miR-21-5p    | 1443322.602  | -0.026743609 | 0.123865373  | -0.21980877  | 0.829058934  | 0.908245461 | hsa-miR-21-5p    | 1443322.602  | 0.342561268  | 0.123865375 | -2.176593436 | 0.006581992 | 0.019111955  |
| hsa-miR-3064-5p  | 3.223144152  | 0.117909091  | 0.545666635  | 0.216073057  | 0.8283930801 | 0.908245461 | hsa-miR-3064-5p  | 3.223144152  | -0.612457291 | 0.552739475 | -1.108039715 | 0.267844664 | 0.444096839  |
| hsa-miR-23a-3p   | 7336.771843  | 0.021553785  | 0.101152131  | 0.212904901  | 0.831401139  | 0.909495177 | hsa-miR-23a-3p   | 7336.771843  | 0.807649041  | 0.101070447 | 7.990951544  | 1.34E-15    | 2.21E-14     |
| hsa-miR-23b-5p   | 1.191096003  | 0.102597529  | 0.487979745  | 0.21032801   | 0.833541675  | 0.910378288 | hsa-miR-23b-5p   | 1.191096003  | 0.232660709  | 0.485791206 | -0.478993321 | 0.63194334  | 0.776303051  |
| hsa-miR-4458     | 1.474569053  | -0.09388598  | 0.454990473  | -0.206347149 | 0.836511952  | 0.912457424 | hsa-miR-4458     | 1.474569053  | -0.206068265 | 0.451977995 | -0.44592437  | 0.64843937  | 0.785378033  |
| hsa-le1-a-3p     | 339.2790727  | 0.029904187  | 0.147546584  | 0.202676244  | 0.839388093  | 0.914268757 | hsa-le1-a-3p     | 339.2790727  | 0.741519493  | 0.146587898 | 5.0588531466 | 4.22E-07    | 3.16E-06     |
| hsa-miR-197-5p   | 2.717488974  | 0.110952508  | 0.556780962  | 0.199279697  | 0.84204766   | 0.914344457 | hsa-miR-197-5p   | 2.717488974  | 0.094211764  | 0.558006721 | 0.168836253  | 0.865925442 | 0.929315011  |



|                    |             |               |             |              |              |             |                    |             |              |             |              |             |             |
|--------------------|-------------|---------------|-------------|--------------|--------------|-------------|--------------------|-------------|--------------|-------------|--------------|-------------|-------------|
| hsa-mir-548a-3p    | 1.853127034 | 0.104843906   | 0.529638409 | 0.197953744  | 0.843081255  | 0.91434457  | hsa-mir-548a-3p    | 1.853127034 | -0.358243681 | 0.524146172 | -0.663480487 | 0.494303276 | 0.653722717 |
| hsa-mir-6724-5p    | 21.59603621 | 0.06531004    | 0.329534795 | 0.198251218  | 0.842647734  | 0.9144457   | hsa-mir-6724-5p    | 21.59603621 | 1.009338233  | 0.321246716 | 3.141941012  | 0.001678318 | 0.706648782 |
| hsa-mir-610        | 3.389069511 | -0.070885597  | 0.363245494 | 0.195145155  | 0.845279317  | 0.915416943 | hsa-mir-610        | 3.389069511 | 0.1914144073 | 0.363087533 | 0.52718437   | 0.598065561 | 0.244706636 |
| hsa-mir-266-1-3p   | 13.07689274 | 0.07149254    | 0.374877242 | 0.190709204  | 0.848753428  | 0.917866207 | hsa-mir-266-1-3p   | 13.07689274 | -0.148573727 | 0.385337886 | -0.38556174  | 0.65981708  | 0.820147619 |
| hsa-mir-1306-3p    | 7.672078604 | -0.077615818  | 0.417673128 | -0.183829091 | 0.85257879   | 0.920687795 | hsa-mir-1306-3p    | 7.672078604 | -1.005310315 | 0.448646774 | -2.240761269 | 0.025041543 | 0.068059169 |
| hsa-mir-3611       | 6.417309277 | 0.08923123    | 0.514333225 | 0.173473381  | 0.86227935   | 0.929836649 | hsa-mir-3611       | 6.417309277 | -0.137080955 | 0.519600622 | -0.263819843 | 0.791918743 | 0.884685754 |
| hsa-mir-6859-5p    | 5.460409624 | 0.082699588   | 0.487756491 | 0.169550975  | 0.865363281  | 0.931834998 | hsa-mir-6859-5p    | 5.460409624 | -0.598201079 | 0.504357828 | -1.786064425 | 0.2335967   | 0.304869892 |
| hsa-mir-182-3p     | 13.10402432 | 0.061701327   | 0.370488581 | 0.166542871  | 0.867729748  | 0.933055993 | hsa-mir-182-3p     | 13.10402432 | 0.985698927  | 0.360242239 | -0.287500728 | 0.186051508 | 0.020725919 |
| hsa-mir-3918       | 2.560090569 | -0.09201657   | 0.559376514 | -0.16449451  | 0.869338766  | 0.933460207 | hsa-mir-3918       | 2.560090569 | 0.325646292  | 0.559282856 | 0.582256883  | 0.560393663 | 0.712644642 |
| hsa-mir-1271-5p    | 7.45517096  | 0.074236993   | 0.467066489 | 0.158943064  | 0.871317331  | 0.936829029 | hsa-mir-1271-5p    | 7.45517096  | -0.849225183 | 0.487103625 | -1.743417907 | 0.081260634 | 0.1814354   |
| hsa-mir-3619-5p    | 2.358990601 | -0.082838937  | 0.55106018  | -0.149511686 | 0.881347889  | 0.939730131 | hsa-mir-3619-5p    | 2.358990601 | 0.919502032  | 0.54227256  | -2.14482922  | 0.031966504 | 0.082479701 |
| hsa-mir-4785       | 8.263461888 | 0.058930287   | 0.38996606  | 0.151115676  | 0.879884467  | 0.939730131 | hsa-mir-4785       | 8.263461888 | -0.091904281 | 0.402834316 | -0.228144122 | 0.8195342   | 0.908388268 |
| hsa-mir-598-3p     | 287.2133849 | 0.025967946   | 0.174031802 | 0.149213799  | 0.881384932  | 0.939730131 | hsa-mir-598-3p     | 287.2133849 | -0.451305598 | 0.176645619 | -2.554864363 | 0.010622918 | 0.032624536 |
| hsa-mir-6837-3p    | 5.884286578 | 0.066646197   | 0.439501463 | 0.151640444  | 0.879470532  | 0.939730131 | hsa-mir-6837-3p    | 5.884286578 | -0.383083444 | 0.298277347 | -1.284319604 | 0.19903015  | 0.360481181 |
| hsa-mir-548p       | 20.46649975 | 0.040388727   | 0.281779004 | 0.143334763  | 0.886025802  | 0.943449553 | hsa-mir-548p       | 20.46649975 | -0.130171131 | 0.452768005 | -0.287500728 | 0.773728944 | 0.873706901 |
| hsa-mir-1305       | 13.3531438  | 0.051645867   | 0.375603031 | 0.1375501199 | 0.890634645  | 0.946733552 | hsa-mir-1305       | 13.3531438  | -0.223512965 | 0.38694195  | -0.577639528 | 0.563507514 | 0.71543356  |
| hsa-mir-3138       | 1.108852098 | 0.057044301   | 0.4341285   | 0.131399577  | 0.895459223  | 0.946733552 | hsa-mir-3138       | 1.108852098 | -0.411553968 | 0.42764674  | -0.962369007 | 0.335864276 | 0.511699104 |
| hsa-mir-4712-3p    | 2.454192537 | -0.075457308  | 0.555947284 | -0.135727451 | 0.8920306746 | 0.946733552 | hsa-mir-4712-3p    | 2.454192537 | 0.72026873   | 0.557156621 | 1.292758093  | 0.196094739 | 0.35599442  |
| hsa-mir-874-5p     | 6.081159154 | 0.058897149   | 0.447427705 | 0.131633007  | 0.894371348  | 0.946733552 | hsa-mir-874-5p     | 6.081159154 | 0.101502938  | 0.454407077 | -0.22373276  | 0.823245401 | 0.908988878 |
| hsa-mir-98-3p      | 141.9440646 | 0.051173303   | 0.389631435 | 0.132774973  | 0.894371348  | 0.946733552 | hsa-mir-98-3p      | 141.9440646 | -0.011379954 | 0.389613594 | -0.029208309 | 0.976698454 | 0.984500929 |
| hsa-mir-190-1-5p   | 5.642089412 | 0.053962027   | 0.440640554 | 0.12246269   | 0.90233293   | 0.950225207 | hsa-mir-190-1-5p   | 5.642089412 | -0.449788208 | 0.461815848 | -0.973955766 | 0.330078503 | 0.509515129 |
| hsa-mir-308-5p     | 454806.1855 | 0.017211893   | 0.139953751 | 0.122982717  | 0.902120784  | 0.950225207 | hsa-mir-308-5p     | 454806.1855 | 0.436885853  | 0.139953642 | 3.121644966  | 0.001798437 | 0.006888672 |
| hsa-mir-4532       | 5534.618005 | 0.023600123   | 0.191782224 | 0.123056886  | 0.902681296  | 0.950225207 | hsa-mir-4532       | 5534.618005 | 0.5029982189 | 0.191768523 | 0.008719483  | 0.027653216 | 0.006888672 |
| hsa-mir-1273f      | 12.1979145  | 0.044743506   | 0.37552785  | 0.118486999  | 0.905602107  | 0.950903078 | hsa-mir-1273f      | 12.1979145  | -0.337231    | 0.378992892 | 0.889808244  | 0.373568859 | 0.52158819  |
| hsa-mir-3613-3p    | 2.755377257 | -0.06578354   | 0.554791608 | -0.118573424 | 0.905613322  | 0.950903078 | hsa-mir-3613-3p    | 2.755377257 | -0.188269843 | 0.553298673 | -0.340286018 | 0.733656699 | 0.839368133 |
| hsa-mir-1180-3p    | 142.1467669 | -0.021008685  | 0.185661737 | -0.13575825  | 0.909574053  | 0.952347936 | hsa-mir-1180-3p    | 142.1467669 | 0.124794419  | 0.186856569 | 0.66786209   | 0.50421628  | 0.659562635 |
| hsa-mir-892a       | 23.81293075 | -0.029627112  | 0.259492642 | -0.114177567 | 0.909100476  | 0.952347936 | hsa-mir-892a       | 23.81293075 | 0.020666895  | 0.265811806 | 0.07786107   | 0.937938557 | 0.974302495 |
| hsa-le1-7f-2-3p    | 443.4242306 | 0.001994799   | 0.160903359 | 0.105621157  | 0.915882937  | 0.953857503 | hsa-le1-7f-2-3p    | 443.4242306 | 0.535693985  | 0.160614263 | 3.335282776  | 0.000852127 | 0.903983884 |
| hsa-mir-3661       | 28.32615632 | -0.033155911  | 0.31463191  | -0.105403024 | 0.916056017  | 0.953857503 | hsa-mir-3661       | 28.32615632 | -0.283751419 | 0.322387428 | -0.880156975 | 0.378747278 | 0.555297385 |
| hsa-mir-548a-5p    | 2.159608472 | 0.057424928   | 0.522271747 | 0.1099522    | 0.912447284  | 0.953857503 | hsa-mir-548a-5p    | 2.159608472 | 0.519719986  | 0.522750268 | 0.994203193  | 0.320129594 | 0.500547021 |
| hsa-mir-797e       | 13.5118309  | 0.033844704   | 0.316708468 | 0.106863906  | 0.914896948  | 0.953857503 | hsa-mir-797e       | 13.5118309  | 0.041897876  | 0.32557042  | 0.128690671  | 0.897602417 | 0.952782894 |
| hsa-mir-139-3p     | 3.551218869 | 0.056974485   | 0.550795123 | 0.10344043   | 0.917613425  | 0.954166708 | hsa-mir-139-3p     | 3.551218869 | -0.791426407 | 0.551730197 | 1.434444608  | 0.151445426 | 0.291992793 |
| hsa-mir-4757-3p    | 1.008635574 | 0.042962533   | 0.427231238 | 0.100560374  | 0.919899454  | 0.955231669 | hsa-mir-4757-3p    | 1.008635574 | -0.396451022 | 0.420664983 | -0.942438848 | 0.345968006 | 0.52197503  |
| hsa-mir-32-3p      | 68.22156503 | 0.014842992   | 0.164027528 | 0.090490861  | 0.927897156  | 0.960902898 | hsa-mir-32-3p      | 68.22156503 | 0.385026207  | 0.16402638  | 2.347343192  | 0.01890783  | 0.053814593 |
| hsa-mir-6850-3p    | 1.097604215 | 0.047198274   | 0.521598496 | 0.090484775  | 0.927899628  | 0.960902898 | hsa-mir-6850-3p    | 1.097604215 | 0.516288845  | 0.522599669 | 0.987924172  | 0.323189786 | 0.503243415 |
| hsa-mir-326        | 50.83283798 | -0.047402637  | 0.557579654 | -0.085015004 | 0.932249462  | 0.962148678 | hsa-mir-326        | 50.83283798 | -0.064800759 | 0.55753549  | -0.116227759 | 0.907472037 | 0.959327582 |
| hsa-mir-5010-3p    | 4.255207013 | -0.045641686  | 0.538670551 | -0.084730241 | 0.932478553  | 0.962148678 | hsa-mir-5010-3p    | 4.255207013 | 0.029364815  | 0.537917145 | 0.054589848  | 0.956465227 | 0.959327582 |
| hsa-mir-892c-3p    | 1.164491117 | -0.038966694  | 0.462937007 | -0.084177097 | 0.932915627  | 0.962148678 | hsa-mir-892c-3p    | 1.164491117 | 0.35642141   | 0.463134274 | 0.769585475  | 0.441545824 | 0.615254541 |
| hsa-mir-548i-3p    | 1.150607672 | 0.028781073   | 0.435431106 | 0.06609788   | 0.948729899  | 0.975404865 | hsa-mir-548i-3p    | 1.150607672 | -0.430806728 | 0.429163818 | -1.003828166 | 0.315454446 | 0.497187715 |
| hsa-mir-6772-3p    | 2.388337029 | 0.034316142   | 0.529701873 | 0.064783879  | 0.948346078  | 0.975404865 | hsa-mir-6772-3p    | 2.388337029 | -0.898788612 | 0.521569312 | -1.723233096 | 0.084485303 | 0.187286675 |
| hsa-mir-320a/b/c/d | 6494.839047 | -0.010779517  | 0.182976512 | -0.058912024 | 0.95302218   | 0.978884383 | hsa-mir-320a/b/c/d | 6494.839047 | -0.326749947 | 0.183063738 | -1.784897162 | 0.074277999 | 0.169249682 |
| hsa-mir-548a-3p    | 3.384618068 | -0.030418854  | 0.538185867 | -0.056521094 | 0.95426692   | 0.979511525 | hsa-mir-548a-3p    | 3.384618068 | 0.047386853  | 0.540874206 | 0.087611597  | 0.930185385 | 0.968839201 |
| hsa-mir-222-5p     | 41.35364458 | 0.011251691   | 0.20807476  | 0.054075231  | 0.956875226  | 0.979949982 | hsa-mir-222-5p     | 41.35364458 | 0.083931582  | 0.208548526 | 0.402455888  | 0.687348456 | 0.812862957 |
| hsa-mir-548d-5p    | 10.09815395 | 0.020137413   | 0.381861644 | 0.0502734841 | 0.957943179  | 0.979949982 | hsa-mir-548d-5p    | 10.09815395 | -0.398999816 | 0.381672254 | -0.705399062 | 0.295838221 | 0.64664206  |
| hsa-mir-4477b      | 9.700600935 | 0.020752255   | 0.41369019  | 0.050163758  | 0.959991892  | 0.980720062 | hsa-mir-4477b      | 9.700600935 | -0.309519963 | 0.426522497 | -0.725681213 | 0.468034423 | 0.634664206 |
| hsa-mir-3200-5p    | 1.132451859 | 0.018526843   | 0.495606594 | 0.037376103  | 0.970185127  | 0.983128279 | hsa-mir-3200-5p    | 1.132451859 | -0.331851947 | 0.488496574 | -0.679333214 | 0.496926756 | 0.653722717 |
| hsa-mir-3610       | 1.490156022 | -0.021585817  | 0.539193141 | -0.040033553 | 0.968066676  | 0.983128279 | hsa-mir-3610       | 1.490156022 | 0.253873182  | 0.538510847 | 0.471435595  | 0.637329702 | 0.778980164 |
| hsa-mir-3678-3p    | 1.322418676 | -0.0202671577 | 0.489545566 | -0.041613324 | 0.96607018   | 0.983128279 | hsa-mir-3678-3p    | 1.322418676 | 0.001404931  | 0.448614988 | 0.002885965  | 0.997697336 | 0.900868028 |
| hsa-mir-500a-5p    | 3.17981339  | -0.022697507  | 0.519015076 | -0.043713883 | 0.965181825  | 0.983128279 | hsa-mir-500a-5p    | 3.17981339  | -1.962527279 | 0.549144886 | -3.573787905 | 0.000035884 | 0.001856912 |
| hsa-mir-501-5p     | 6.594907951 | -0.020991251  | 0.472448315 | -0.044430789 | 0.96456102   | 0.983128279 | hsa-mir-501-5p     | 6.594907951 | -0.052623451 | 0.478691418 | -0.109391887 | 0.912463394 | 0.960683004 |
| hsa-mir-590-3p     | 239.4850666 | 0.006625706   | 0.170306367 | 0.038904629  | 0.968966426  | 0.983128279 | hsa-mir-590-3p     | 239.4850666 | -0.31430131  | 0.17286565  | -1.81818256  | 0.069036225 | 0.159172565 |

|                   |             |              |             |              |             |             |                   |             |               |             |              |             |             |
|-------------------|-------------|--------------|-------------|--------------|-------------|-------------|-------------------|-------------|---------------|-------------|--------------|-------------|-------------|
| hsa-miR-1277-3p   | 2.223595363 | 0.013242824  | 0.55876024  | 0.02370037   | 0.981091611 | 0.992637895 | hsa-miR-1277-3p   | 2.223595363 | -0.104819041  | 0.559771567 | -0.187253243 | 0.851462081 | 0.924722933 |
| hsa-miR-3150-5p   | 3.687453389 | 0.012426966  | 0.555359173 | 0.022376449  | 0.982147666 | 0.992637895 | hsa-miR-3150-5p   | 3.687453389 | -0.45384      | 0.57726651  | -0.813731958 | 0.415798562 | 0.592798994 |
| hsa-miR-3150b     | 5.83917103  | 0.011325142  | 0.556668733 | 0.020351803  | 0.983762732 | 0.992944517 | hsa-miR-3150b     | 5.83917103  | 0.112282429   | 0.556940105 | 0.201603813  | 0.842022644 | 0.919756657 |
| hsa-miR-199b-5p   | 1.791805785 | -0.008625745 | 0.520297106 | -0.0165785   | 0.986772877 | 0.992995104 | hsa-miR-199b-5p   | 1.791805785 | 0.114772343   | 0.518750129 | 0.2212447814 | 0.848899482 | 0.908985878 |
| hsa-miR-2278      | 1.870415753 | 0.010245382  | 0.557952734 | 0.018362455  | 0.985349704 | 0.992995104 | hsa-miR-2278      | 1.870415753 | -0.445810264  | 0.554517042 | -0.803961341 | 0.421419302 | 0.596812592 |
| hsa-miR-624-5p    | 16.62712803 | -0.00434723  | 0.557952733 | -0.01455933  | 0.98383746  | 0.992995104 | hsa-miR-624-5p    | 16.62712803 | -0.0027405    | 0.306884146 | -0.007479241 | 0.994032565 | 0.99659781  |
| hsa-miR-9-5p      | 267.414023  | 0.002074232  | 0.151227223 | 0.013711871  | 0.989505852 | 0.992995104 | hsa-miR-9-5p      | 267.414023  | -0.4967745    | 0.154688287 | -3.211455185 | 0.001320664 | 0.005344488 |
| hsa-miR-548b-3p   | 7.42490056  | -0.004612618 | 0.414096232 | -0.011138999 | 0.991112548 | 0.993738012 | hsa-miR-548b-3p   | 7.42490056  | -2.13078304   | 0.427711594 | -0.498182202 | 0.618355626 | 0.767511695 |
| hsa-miR-682-5p    | 8.220833926 | -0.000801096 | 0.417257688 | -0.001919907 | 0.998468137 | 0.999788862 | hsa-miR-682-5p    | 8.220833926 | -0.66689011   | 0.439447844 | -1.517583386 | 0.129119307 | 0.258162904 |
| hsa-miR-3145-3p   | 1.689707143 | 1.06E-06     | 0.560242301 | 1.89E-06     | 0.999998491 | 0.999998491 | hsa-miR-3145-3p   | 1.689707143 | 0.765005091   | 0.555704542 | -1.376639981 | 0.168623583 | 0.318784731 |
| hsa-miR-1180-5p   | 0.451762671 | 0.024180747  | 0.340479481 | 0.07101969   | 0.943382085 | NA          | hsa-miR-1180-5p   | 0.451762671 | 0.122973991   | 0.34041574  | 0.36124649   | 0.717915191 | NA          |
| hsa-miR-1180-5p   | 0.268935    | -0.028207008 | 0.307203412 | -0.091818668 | 0.926842112 | NA          | hsa-miR-1180-5p   | 0.268935    | -0.092194024  | 0.307203412 | -0.300107423 | 0.764095218 | NA          |
| hsa-miR-1184      | 0.083511147 | -0.07184708  | 0.306970399 | -0.234052142 | 0.814944499 | NA          | hsa-miR-1184      | 0.083511147 | -0.041659876  | 0.306970399 | -0.135713007 | 0.892048165 | NA          |
| hsa-miR-1185-1-3p | 0.639245496 | -1.017447236 | 0.483270161 | -2.105338417 | 0.98326186  | NA          | hsa-miR-1185-1-3p | 0.639245496 | -0.933623284  | 0.483270161 | -1.93188868  | 0.053373469 | NA          |
| hsa-miR-1185-2-3p | 0.100865933 | -0.07184708  | 0.306970399 | -0.234052142 | 0.814944499 | NA          | hsa-miR-1185-2-3p | 0.100865933 | -0.041659876  | 0.306970399 | -0.135713007 | 0.892048165 | NA          |
| hsa-miR-122-5p    | 0.459725941 | 0.307058067  | 0.307058067 | 0            | 1           | NA          | hsa-miR-122-5p    | 0.459725941 | 0.286712254   | 0.307058067 | 0.933739525  | 0.350438271 | NA          |
| hsa-miR-1224-3p   | 0.88378959  | 0.11058037   | 0.414220257 | 0.268777166  | 0.788101166 | NA          | hsa-miR-1224-3p   | 0.88378959  | -0.019164946  | 0.40769881  | -0.047007609 | 0.962507163 | 0.982381261 |
| hsa-miR-1234-3p   | 0.122034101 | 0.11650136   | 0.306970399 | 0.379519849  | 0.704301868 | NA          | hsa-miR-1234-3p   | 0.122034101 | 0.284293132   | 0.306970399 | 0            | 1           | NA          |
| hsa-miR-1237-3p   | 0.284293132 | 0.21067579   | 0.306970399 | 0.686305844  | 0.492520264 | NA          | hsa-miR-1237-3p   | 0.284293132 | 0.88378959    | 0.306970399 | 0            | 1           | NA          |
| hsa-miR-124-3p    | 0.110768181 | -0.07184708  | 0.306970399 | -0.234052142 | 0.814944499 | NA          | hsa-miR-124-3p    | 0.110768181 | -0.041659876  | 0.306970399 | -0.135713007 | 0.892048165 | NA          |
| hsa-miR-1244      | 0.350282631 | 0            | 0.306970399 | 0            | 1           | NA          | hsa-miR-1244      | 0.350282631 | 0.240862783   | 0.306970399 | 0.784644979  | 0.43266175  | NA          |
| hsa-miR-1248      | 0.794008372 | 0.118577622  | 0.416690694 | 0.284569883  | 0.775973688 | NA          | hsa-miR-1248      | 0.794008372 | -0.313610384  | 0.409894578 | -0.765100105 | 0.444211937 | 0.61524541  |
| hsa-miR-1249-3p   | 0.381765145 | 0.162350852  | 0.307058067 | 0.528730132  | 0.509992671 | NA          | hsa-miR-1249-3p   | 0.381765145 | 0.145450946   | 0.307058067 | 0.473661988  | 0.635719568 | NA          |
| hsa-miR-1264      | 0.234810045 | -0.202750881 | 0.307229222 | -0.65978111  | 0.509992671 | NA          | hsa-miR-1264      | 0.234810045 | -0.172518677  | 0.307229222 | -0.561358725 | 0.574435725 | NA          |
| hsa-miR-1267      | 0.703804667 | 0.093479704  | 0.362363186 | 0.257977409  | 0.796428201 | NA          | hsa-miR-1267      | 0.703804667 | -0.2113350218 | 0.358412262 | -0.589684673 | 0.555402073 | NA          |
| hsa-miR-1273c     | 0.186989606 | 0.163588469  | 0.306970399 | 0.532912847  | 0.594093912 | NA          | hsa-miR-1273c     | 0.186989606 | 0             | 0.306970399 | 0            | 1           | NA          |
| hsa-miR-1273h-5p  | 0.50002659  | 0.02232714   | 0.306970399 | 0.072733853  | 0.942017909 | NA          | hsa-miR-1273h-5p  | 0.50002659  | 0.330980666   | 0.307241655 | 1.077264951  | 0.281361915 | NA          |
| hsa-miR-1289      | 0.254253997 | 0.040325126  | 0.336092788 | 0.120062458  | 0.904433672 | NA          | hsa-miR-1289      | 0.254253997 | -0.041659876  | 0.306970399 | -0.135713007 | 0.892048165 | NA          |
| hsa-miR-129-5p    | 0.402946423 | 0.040325126  | 0.336092788 | 0.120062458  | 0.904433672 | NA          | hsa-miR-129-5p    | 0.402946423 | 0.077172117   | 0.336092788 | 0.229615509  | 0.818390554 | NA          |
| hsa-miR-1298-3p   | 0.12526672  | -0.118934189 | 0.306970399 | -0.38744514  | 0.698426691 | NA          | hsa-miR-1298-3p   | 0.12526672  | -0.088746986  | 0.306970399 | -0.289106005 | 0.772500258 | NA          |
| hsa-miR-134-5p    | 0.204926845 | -0.118934189 | 0.306970399 | -0.38744514  | 0.698426691 | NA          | hsa-miR-134-5p    | 0.204926845 | -0.088746986  | 0.306970399 | -0.289106005 | 0.772500258 | NA          |
| hsa-miR-141-5p    | 0.710845056 | -0.100066618 | 0.449832771 | -0.222457377 | 0.823957851 | NA          | hsa-miR-141-5p    | 0.710845056 | 0.229935396   | 0.449340455 | 0.5111717549 | 0.608848703 | NA          |
| hsa-miR-144-3p    | 0.151285944 | 0            | 0.306970399 | 0            | 1           | NA          | hsa-miR-144-3p    | 0.151285944 | 0.146688563   | 0.306970399 | 0.477858984  | 0.632750576 | NA          |
| hsa-miR-149-3p    | 0.155507092 | 0            | 0.306970399 | 0            | 1           | NA          | hsa-miR-149-3p    | 0.155507092 | 0.146688563   | 0.306970399 | 0.477858984  | 0.632750576 | NA          |
| hsa-miR-150-5p    | 0.165514013 | -0.118934189 | 0.306970399 | -0.38744514  | 0.698426691 | NA          | hsa-miR-150-5p    | 0.165514013 | -0.088746986  | 0.306970399 | -0.289106005 | 0.772500258 | NA          |
| hsa-miR-153-5p    | 0.151298899 | -0.118934189 | 0.306970399 | -0.38744514  | 0.698426691 | NA          | hsa-miR-153-5p    | 0.151298899 | -0.088746986  | 0.306970399 | -0.289106005 | 0.772500258 | NA          |
| hsa-miR-1537-3p   | 0.151285944 | 0            | 0.306970399 | 0            | 1           | NA          | hsa-miR-1537-3p   | 0.151285944 | 0.146688563   | 0.306970399 | 0.477858984  | 0.632750576 | NA          |
| hsa-miR-1537-5p   | 0.117636101 | 0.11650136   | 0.306970399 | 0.379519849  | 0.704301868 | NA          | hsa-miR-1537-5p   | 0.117636101 | 0             | 0.306970399 | 0            | 1           | NA          |
| hsa-miR-181d-3p   | 0.142146566 | 0.11650136   | 0.306970399 | 0.379519849  | 0.704301868 | NA          | hsa-miR-181d-3p   | 0.142146566 | 0             | 0.306970399 | 0            | 1           | NA          |
| hsa-miR-180-5p    | 0.715202749 | 0.06935194   | 0.361060152 | 0.192078631  | 0.847680613 | NA          | hsa-miR-180-5p    | 0.715202749 | -0.020763202  | 0.358212226 | -0.057961954 | 0.953778933 | NA          |
| hsa-miR-180-5p    | 0.142733741 | 0.11650136   | 0.306970399 | 0.379519849  | 0.704301868 | NA          | hsa-miR-180-5p    | 0.142733741 | 0             | 0.306970399 | 0            | 1           | NA          |
| hsa-miR-190a-3p   | 0.083511147 | -0.07184708  | 0.306970399 | -0.234052142 | 0.814944499 | NA          | hsa-miR-190a-3p   | 0.083511147 | -0.041659876  | 0.306970399 | -0.135713007 | 0.892048165 | NA          |
| hsa-miR-191-1-5p  | 0.221536363 | -0.167440767 | 0.30707056  | -0.545848337 | 0.585557975 | NA          | hsa-miR-191-1-5p  | 0.221536363 | -0.137253563  | 0.30707056  | -0.446977279 | 0.654891465 | NA          |
| hsa-miR-191-1-5p  | 0.32958582  | -0.02820701  | 0.30703412  | -0.091818668 | 0.926842107 | NA          | hsa-miR-191-1-5p  | 0.32958582  | -0.092194026  | 0.307203412 | -0.300107429 | 0.764095218 | NA          |
| hsa-miR-193a-5p   | 0.194775539 | 0            | 0.306970399 | 0            | 1           | NA          | hsa-miR-193a-5p   | 0.194775539 | 0.146688563   | 0.306970399 | 0.477858984  | 0.632750576 | NA          |
| hsa-miR-194-3p    | 0.830951266 | -0.054533466 | 0.449360705 | -0.121357887 | 0.903407571 | NA          | hsa-miR-194-3p    | 0.830951266 | -0.018479058  | 0.44592973  | -0.041459394 | 0.966945608 | 0.984500929 |
| hsa-miR-200c-3p   | 0.261277634 | 0.02232714   | 0.306970399 | 0.072733853  | 0.942017909 | NA          | hsa-miR-200c-3p   | 0.261277634 | -0.041659876  | 0.306970399 | -0.135713007 | 0.892048165 | NA          |
| hsa-miR-214-5p    | 0.264950402 | 0            | 0.306970399 | 0            | 1           | NA          | hsa-miR-214-5p    | 0.264950402 | 0.193775673   | 0.306970399 | 0.631251929  | 0.527875778 | NA          |
| hsa-miR-215-3p    | 0.272464676 | -0.07184708  | 0.306970399 | -0.234052142 | 0.814944499 | NA          | hsa-miR-215-3p    | 0.272464676 | 0.052514344   | 0.306970399 | 0.171072988  | 0.864166375 | NA          |
| hsa-miR-216a-5p   | 0.52985421  | -0.209438672 | 0.354649211 | -0.590551637 | 0.554820878 | NA          | hsa-miR-216a-5p   | 0.52985421  | -0.307195208  | 0.353687598 | -0.868599561 | 0.385093553 | NA          |
| hsa-miR-23a-5p    | 0.819756289 | 0            | 0.44551637  | 0            | 1           | NA          | hsa-miR-23a-5p    | 0.819756289 | 1.018277409   | 0.452101289 | 2.2532314    | 0.024301969 | 0.066488133 |

|                 |              |               |              |               |             |    |                 |              |              |             |              |             |             |
|-----------------|--------------|---------------|--------------|---------------|-------------|----|-----------------|--------------|--------------|-------------|--------------|-------------|-------------|
| hsa-mir-296-5p  | 0.226928917  | 0             | 0.306970399  | 0             | 1           | NA | hsa-mir-296-5p  | 0.226928917  | 0.193775673  | 0.306970399 | 0.631251982  | 0.527875778 | NA          |
| hsa-mir-3122    | 0.124659738  | 0.11650136    | 0.306970399  | 0.379519849   | 0.704301868 | NA | hsa-mir-3122    | 0.124659738  | 0            | 0.306970399 | 0            | 1           | NA          |
| hsa-mir-3124-5p | 0.611418743  | 0.393073571   | 0.40837128   | 0.962539705   | 0.335778586 | NA | hsa-mir-3124-5p | 0.611418743  | 0.39862021   | 0.405259249 | 0.983617797  | 0.323303471 | NA          |
| hsa-mir-3126-3p | 0.142146566  | 0.11650136    | 0.306970399  | 0.379519849   | 0.704301868 | NA | hsa-mir-3126-3p | 0.142146566  | 0            | 0.306970399 | 0            | 1           | NA          |
| hsa-mir-3127-3p | 0.786863804  | 0.39322215    | 0.376393229  | 1.044711011   | 0.296165654 | NA | hsa-mir-3127-3p | 0.786863804  | 0.246608591  | 0.372912275 | 0.661304567  | 0.508417013 | 0.660602039 |
| hsa-mir-3131    | 0.151285944  | 0             | 0.306970399  | 0             | 1           | NA | hsa-mir-3131    | 0.151285944  | 0.146688563  | 0.306970399 | 0.477858984  | 0.632750576 | NA          |
| hsa-mir-3133    | 0.204926845  | -0.118934189  | 0.306970399  | -0.38744514   | 0.698426691 | NA | hsa-mir-3133    | 0.204926845  | 0.088746986  | 0.306970399 | -0.289106005 | 0.772500258 | NA          |
| hsa-mir-3140-3p | 0.264950402  | 0             | 0.306970399  | 0             | 1           | NA | hsa-mir-3140-3p | 0.264950402  | 0.193775673  | 0.306970399 | 0.631251982  | 0.527875778 | NA          |
| hsa-mir-3141    | 0.287222332  | 0.066706319   | 0.307156324  | 0.217173841   | 0.828072877 | NA | hsa-mir-3141    | 0.287222332  | -0.044367807 | 0.307156324 | -0.144446992 | 0.885147512 | NA          |
| hsa-mir-3145-5p | 0.247386078  | -0.1672440736 | 0.30707056   | -0.545284238  | 0.585558043 | NA | hsa-mir-3145-5p | 0.247386078  | -0.13725353  | 0.30707056  | -0.446971179 | 0.654891557 | NA          |
| hsa-mir-3149    | 0.482965184  | -0.441805941  | 0.357118897  | -1.237139633  | 0.216035248 | NA | hsa-mir-3149    | 0.482965184  | -0.400412515 | 0.306970399 | -1.121230264 | 0.262189861 | NA          |
| hsa-mir-3152-5p | 0.161696494  | 0             | 0.306970399  | 0             | 1           | NA | hsa-mir-3152-5p | 0.161696494  | 0.146688563  | 0.306970399 | 0.477858984  | 0.632750576 | NA          |
| hsa-mir-3156-3p | 0.323392989  | 0             | 0.306970399  | 0             | 1           | NA | hsa-mir-3156-3p | 0.323392989  | 0.240862783  | 0.306970399 | 0.784644979  | 0.43266175  | NA          |
| hsa-mir-3157-5p | 0.865600351  | -0.327349637  | 0.467054521  | -0.700808094  | 0.483377286 | NA | hsa-mir-3157-5p | 0.865600351  | -0.324272509 | 0.467054521 | -0.700754871 | 0.483456006 | 0.645438689 |
| hsa-mir-3161    | 0.155507092  | 0             | 0.306970399  | 0             | 1           | NA | hsa-mir-3161    | 0.155507092  | 0.146688563  | 0.306970399 | 0.477858984  | 0.632750576 | NA          |
| hsa-mir-3167    | 0.644304069  | 0.249912334   | 0.408092134  | 0.612391941   | 0.540278473 | NA | hsa-mir-3167    | 0.644304069  | 0.077057799  | 0.403758768 | 0.190851084  | 0.848642265 | NA          |
| hsa-mir-3170    | 0.176633601  | 0             | 0.306970399  | 0             | 1           | NA | hsa-mir-3170    | 0.176633601  | 0.146688563  | 0.306970399 | 0.477858984  | 0.632750576 | NA          |
| hsa-mir-3173-5p | 0.606350222  | -0.34757489   | 0.4148666051 | -0.8378000272 | 0.402142886 | NA | hsa-mir-3173-5p | 0.606350222  | -0.487107216 | 0.412476948 | -1.180931973 | 0.237629749 | NA          |
| hsa-mir-3178    | 0.142146566  | 0.11650136    | 0.306970399  | 0.379519849   | 0.704301868 | NA | hsa-mir-3178    | 0.142146566  | 0            | 0.306970399 | 0            | 1           | NA          |
| hsa-mir-3179    | 0.117636101  | 0.11650136    | 0.306970399  | 0.379519849   | 0.704301868 | NA | hsa-mir-3179    | 0.117636101  | 0            | 0.306970399 | 0            | 1           | NA          |
| hsa-mir-3180    | 0.374009125  | 0.024140949   | 0.329964932  | 0.073162166   | 0.94167073  | NA | hsa-mir-3180    | 0.374009125  | 0.059441449  | 0.329964932 | 0.180144745  | 0.857038936 | NA          |
| hsa-mir-3181    | 0.36105234   | 0.038287321   | 0.327761965  | 0.116814413   | 0.907007122 | NA | hsa-mir-3181    | 0.36105234   | 0.073097887  | 0.327761965 | 0.223021263  | 0.825118958 | NA          |
| hsa-mir-3182    | 0.472278877  | -0.059570958  | 0.307726673  | -0.193583999  | 0.846501634 | NA | hsa-mir-3182    | 0.472278877  | 0.206051795  | 0.307726673 | 0.669593549  | 0.503116928 | NA          |
| hsa-mir-3185    | 0.142146566  | 0.11650136    | 0.306970399  | 0.379519849   | 0.704301868 | NA | hsa-mir-3185    | 0.142146566  | 0            | 0.306970399 | 0            | 1           | NA          |
| hsa-mir-3186-3p | 0.204926845  | -0.118934189  | 0.306970399  | -0.38744514   | 0.698426691 | NA | hsa-mir-3186-3p | 0.204926845  | -0.088746986 | 0.306970399 | -0.289106005 | 0.772500258 | NA          |
| hsa-mir-3189-3p | 0.65148758   | -0.485490837  | 0.343473625  | -1.413473414  | 0.157516573 | NA | hsa-mir-3189-3p | 0.65148758   | -0.476131392 | 0.341573959 | -1.393933523 | 0.16333768  | 0.310301656 |
| hsa-mir-3191-3p | 0.100865933  | -0.07184708   | 0.306970399  | -0.234052142  | 0.814944499 | NA | hsa-mir-3191-3p | 0.100865933  | -0.041659876 | 0.306970399 | -0.135713007 | 0.892048165 | NA          |
| hsa-mir-3194-5p | 0.59960773   | -0.003388496  | 0.405098313  | -0.008364627  | 0.993326071 | NA | hsa-mir-3194-5p | 0.59960773   | 0.226411381  | 0.404203154 | 0.567042539  | 0.573382219 | NA          |
| hsa-mir-3202    | 0.639967601  | -0.398013308  | 0.408915598  | -0.973504825  | 0.330302463 | NA | hsa-mir-3202    | 0.639967601  | -0.030036126 | 0.408949886 | -0.073446961 | 0.914540449 | NA          |
| hsa-mir-322a-3p | 0.564837249  | -0.504965595  | 0.366785672  | -1.376732064  | 0.168595102 | NA | hsa-mir-322a-3p | 0.564837249  | -0.463086811 | 0.366629106 | -1.263093417 | 0.206556609 | NA          |
| hsa-mir-34a-3p  | 0.378913735  | 0.130222784   | 0.333039473  | 0.391013062   | 0.695787581 | NA | hsa-mir-34a-3p  | 0.378913735  | -0.057857185 | 0.333022172 | -0.173733731 | 0.862074727 | NA          |
| hsa-mir-34c-3p  | 0.556293307  | 0.059050769   | 0.348321073  | 0.169529706   | 0.865380008 | NA | hsa-mir-34c-3p  | 0.556293307  | 0.005069585  | 0.346471747 | 0.01463203   | 0.988325746 | NA          |
| hsa-mir-3591-5p | 0.155507092  | 0             | 0.306970399  | 0             | 1           | NA | hsa-mir-3591-5p | 0.155507092  | 0.146688563  | 0.306970399 | 0.477858984  | 0.632750576 | NA          |
| hsa-mir-3607-5p | 0.720895073  | 0.238695949   | 0.458607529  | 0.520470788   | 0.602729212 | NA | hsa-mir-3607-5p | 0.720895073  | -0.32965853  | 0.449247204 | -0.733802074 | 0.463069376 | NA          |
| hsa-mir-3616-5p | 0.292163308  | 0             | 0.306970399  | 0             | 1           | NA | hsa-mir-3616-5p | 0.292163308  | 0.193775673  | 0.306970399 | 0.631251982  | 0.527875778 | NA          |
| hsa-mir-3652    | 0.155507092  | 0             | 0.306970399  | 0             | 1           | NA | hsa-mir-3652    | 0.155507092  | 0.146688563  | 0.306970399 | 0.477858984  | 0.632750576 | NA          |
| hsa-mir-3653-5p | 0.323398803  | 0.066706318   | 0.307156324  | 0.217173837   | 0.828072873 | NA | hsa-mir-3653-5p | 0.323398803  | -0.044367808 | 0.307156324 | -0.144446996 | 0.885147509 | NA          |
| hsa-mir-3657    | 0.213219849  | 0.163588469   | 0.306970399  | 0.532912847   | 0.594093912 | NA | hsa-mir-3657    | 0.213219849  | 0            | 0.306970399 | 0            | 1           | NA          |
| hsa-mir-366b-5p | 0.7868190436 | -0.37977373   | 0.414506008  | -0.916216811  | 0.33955519  | NA | hsa-mir-366b-5p | 0.7868190436 | 0.053392673  | 0.415127859 | 0.129928073  | 0.89662334  | 0.952782894 |
| hsa-mir-366d-5p | 0.165514013  | -0.118934189  | 0.306970399  | -0.38744514   | 0.698426691 | NA | hsa-mir-366d-5p | 0.165514013  | -0.088746986 | 0.306970399 | -0.289106005 | 0.772500258 | NA          |
| hsa-mir-3678-5p | 0.161696494  | 0             | 0.306970399  | 0             | 1           | NA | hsa-mir-3678-5p | 0.161696494  | 0.146688563  | 0.306970399 | 0.477858984  | 0.632750576 | NA          |
| hsa-mir-3680-3p | 0.176454151  | 0.163588469   | 0.306970399  | 0.532912847   | 0.594093912 | NA | hsa-mir-3680-3p | 0.176454151  | 0            | 0.306970399 | 0            | 1           | NA          |
| hsa-mir-3680-5p | 0.183051152  | 0.163588469   | 0.306970399  | 0.532912847   | 0.594093912 | NA | hsa-mir-3680-5p | 0.183051152  | 0            | 0.306970399 | 0            | 1           | NA          |
| hsa-mir-3685    | 0.136617896  | -0.07184708   | 0.306970399  | -0.234052142  | 0.814944499 | NA | hsa-mir-3685    | 0.136617896  | -0.041659876 | 0.306970399 | -0.135713007 | 0.892048165 | NA          |
| hsa-mir-3689-3p | 0.421704455  | 0             | 0.307058067  | 0             | 1           | NA | hsa-mir-3689-3p | 0.421704455  | 0.286712267  | 0.307058067 | 0.93373957   | 0.350438248 | NA          |
| hsa-mir-3692-3p | 0.110342676  | -0.07184708   | 0.306970399  | -0.234052142  | 0.814944499 | NA | hsa-mir-3692-3p | 0.110342676  | -0.041659876 | 0.306970399 | -0.135713007 | 0.892048165 | NA          |
| hsa-mir-371a-5p | 0.292163308  | 0             | 0.306970399  | 0             | 1           | NA | hsa-mir-371a-5p | 0.292163308  | 0.193775673  | 0.306970399 | 0.631251982  | 0.527875778 | NA          |
| hsa-mir-371b-5p | 0.83054216   | -0.111246363  | 0.384131611  | -0.289604813  | 0.772118584 | NA | hsa-mir-371b-5p | 0.83054216   | 0.44433638   | 0.38557411  | 1.135240202  | 0.249155915 | 0.423408941 |
| hsa-mir-379-3p  | 0.237483829  | -0.167440736  | 0.30707056   | -0.545284238  | 0.585558043 | NA | hsa-mir-379-3p  | 0.237483829  | -0.13725353  | 0.30707056  | -0.446971179 | 0.654891537 | NA          |
| hsa-mir-3908    | 0.264950402  | 0             | 0.306970399  | 0             | 1           | NA | hsa-mir-3908    | 0.264950402  | 0.193775673  | 0.306970399 | 0.631251982  | 0.527875778 | NA          |
| hsa-mir-3911    | 0.744031584  | -0.030105963  | 0.364221603  | -0.082635679  | 0.93414123  | NA | hsa-mir-3911    | 0.744031584  | 0.198588509  | 0.363400251 | 0.546473231  | 0.584740684 | NA          |

|                  |             |               |             |              |               |    |    |                  |             |              |             |              |              |             |
|------------------|-------------|---------------|-------------|--------------|---------------|----|----|------------------|-------------|--------------|-------------|--------------|--------------|-------------|
| hsa-mir-3917     | 0.302770168 | -0.219152156  | 0.307371297 | -0.712288355 | 0.475852963   | NA | NA | hsa-mir-3917     | 0.302770168 | -0.188964952 | 0.307371297 | -0.614777482 | 0.538701682  | NA          |
| hsa-mir-3919     | 0.727634225 | 0             | 0.309947667 | 0            | NA            | NA | NA | hsa-mir-3919     | 0.727634225 | 0.394686315  | 0.310053397 | 1.272962395  | NA           | NA          |
| hsa-mir-3922-3p  | 0.226928917 | 0             | 0.306970399 | 0            | NA            | 1  | NA | hsa-mir-3922-3p  | 0.226928917 | 0.193775673  | 0.306970399 | 0.631251982  | 0.527875778  | NA          |
| hsa-mir-3925-3p  | 0.619249959 | -0.293548188  | 0.363366259 | -0.807866475 | 0.419167452   | NA | NA | hsa-mir-3925-3p  | 0.619249959 | -0.383241689 | 0.361514015 | -1.060101885 | 0.28909825   | NA          |
| hsa-mir-3940-3p  | 0.700158696 | 0.144224122   | 0.318088341 | 0.453409016  | 0.650254245   | NA | NA | hsa-mir-3940-3p  | 0.700158696 | 0.276390312  | 0.31703832  | 0.871788345  | 0.383323854  | NA          |
| hsa-mir-3940-5p  | 0.296730996 | 0.075377061   | 0.307116976 | 0.245430838  | 0.960120121   | NA | NA | hsa-mir-3940-5p  | 0.296730996 | 0.035697065  | 0.307116976 | -0.116232797 | 0.907468045  | NA          |
| hsa-mir-3941     | 0.222900034 | 0.022327714   | 0.306970399 | 0.072733853  | 0.842017909   | NA | NA | hsa-mir-3941     | 0.222900034 | -0.041659876 | 0.306970399 | -0.135713007 | 0.892048165  | NA          |
| hsa-mir-411-3p   | 0.524047387 | -0.475862912  | 0.362399331 | -1.313111743 | 0.189145298   | NA | NA | hsa-mir-411-3p   | 0.524047387 | -0.433694685 | 0.362352128 | -1.196887367 | 0.231350459  | NA          |
| hsa-mir-4284     | 0.083511147 | -0.07184708   | 0.306970399 | -0.234052142 | 0.814944499   | NA | NA | hsa-mir-4284     | 0.083511147 | 0.041659876  | 0.306970399 | -0.135713007 | 0.892048165  | NA          |
| hsa-mir-4420     | 2.975545012 | -0.422403064  | 0.320223437 | -1.319088535 | NA            | NA | NA | hsa-mir-4420     | 2.975545012 | -0.421251986 | 0.319683892 | -1.317714146 | NA           | NA          |
| hsa-mir-4423-5p  | 0.151285944 | 0             | 0.306970399 | 0            | 1             | NA | NA | hsa-mir-4423-5p  | 0.151285944 | 0.146688563  | 0.306970399 | 0.477858984  | 0.632750576  | NA          |
| hsa-mir-4425     | 0.508602147 | -0.459033326  | 0.359387863 | -1.277264407 | 0.201508915   | NA | NA | hsa-mir-4425     | 0.508602147 | -0.417156094 | 0.35938441  | -1.160751782 | 0.245742857  | NA          |
| hsa-mir-4426     | 0.395177294 | 0.253215307   | 0.336447432 | 0.752614473  | 0.451681438   | NA | NA | hsa-mir-4426     | 0.395177294 | 0.175199845  | 0.336440582 | 0.520745278  | 0.602544282  | NA          |
| hsa-mir-4439     | 0.204926845 | -0.1189334189 | 0.306970399 | -0.38744514  | 0.69884266921 | NA | NA | hsa-mir-4439     | 0.204926845 | -0.088746986 | 0.306970399 | -0.289106005 | 0.772500258  | NA          |
| hsa-mir-4442     | 0.35746202  | 0.126803109   | 0.328313532 | 0.386225656  | 0.699329554   | NA | NA | hsa-mir-4442     | 0.35746202  | -0.056223351 | 0.328295859 | -0.171258178 | 0.864020763  | NA          |
| hsa-mir-4444     | 0.194775539 | 0             | 0.306970399 | 0            | 1             | NA | NA | hsa-mir-4444     | 0.194775539 | 0.146688563  | 0.306970399 | 0.477858984  | 0.632750576  | NA          |
| hsa-mir-4445-5p  | 0.311649344 | 0.256525079   | 0.307058067 | 0.835428561  | 0.403476454   | NA | NA | hsa-mir-4445-5p  | 0.311649344 | 0            | 0.307058067 | 0            | 0            | NA          |
| hsa-mir-4446-3p  | 0.100865933 | -0.07184708   | 0.306970399 | -0.234052142 | 0.814944499   | NA | NA | hsa-mir-4446-3p  | 0.100865933 | -0.041659876 | 0.306970399 | -0.135713007 | 0.892048165  | NA          |
| hsa-mir-4451     | 0.183051152 | 0.163588469   | 0.306970399 | 0.532912847  | 0.594093912   | NA | NA | hsa-mir-4451     | 0.183051152 | 0            | 0.306970399 | 0            | 1            | NA          |
| hsa-mir-4455     | 0.155507092 | 0             | 0.306970399 | 0            | 1             | NA | NA | hsa-mir-4455     | 0.155507092 | 0.146688563  | 0.306970399 | 0.477858984  | 0.632750576  | NA          |
| hsa-mir-4466     | 0.568586264 | 0.356561791   | 0.309945764 | 1.150400593  | NA            | NA | NA | hsa-mir-4466     | 0.568586264 | 0            | 0.308292102 | 0            | NA           | NA          |
| hsa-mir-4469     | 0.214100611 | 0.163588469   | 0.306970399 | 0.532912847  | 0.594093912   | NA | NA | hsa-mir-4469     | 0.214100611 | -0.941046294 | 0.482144639 | -1.951792507 | 0.050962844  | 0.123744156 |
| hsa-mir-4474-3p  | 0.9173717   | -0.738002107  | 0.489280463 | -1.508341662 | 0.131467105   | NA | NA | hsa-mir-4474-3p  | 0.9173717   | 0.146688563  | 0.306970399 | 0.477858984  | 0.632750576  | NA          |
| hsa-mir-4477a    | 0.161696494 | 0             | 0.306970399 | 0            | 1             | NA | NA | hsa-mir-4477a    | 0.161696494 | 0.146688563  | 0.306970399 | 0.477858984  | 0.632750576  | NA          |
| hsa-mir-4488     | 0.151285944 | 0             | 0.306970399 | 0            | 1             | NA | NA | hsa-mir-4488     | 0.151285944 | 0.146688563  | 0.306970399 | 0.477858984  | 0.632750576  | NA          |
| hsa-mir-4490     | 0.151285944 | 0             | 0.306970399 | 0            | 1             | NA | NA | hsa-mir-4490     | 0.151285944 | 0.146688563  | 0.306970399 | 0.477858984  | 0.632750576  | NA          |
| hsa-mir-4492     | 0.731497692 | 0.074250873   | 0.452704793 | 0.164016047  | 0.869718472   | NA | NA | hsa-mir-4492     | 0.731497692 | -0.070884102 | 0.446890802 | -0.158616158 | 0.873971298  | NA          |
| hsa-mir-4498     | 0.186989606 | 0.163588469   | 0.306970399 | 0.532912847  | 0.594093912   | NA | NA | hsa-mir-4498     | 0.186989606 | 0            | 0.306970399 | 0            | 1            | NA          |
| hsa-mir-4502     | 0.766718454 | 0.287700663   | 0.420658025 | 0.683930048  | 0.494019339   | NA | NA | hsa-mir-4502     | 0.766718454 | -0.230402391 | 0.413080927 | -0.557765746 | 0.577004356  | NA          |
| hsa-mir-4503     | 0.211634114 | -0.167440736  | 0.30707056  | -0.545284238 | 0.585558043   | NA | NA | hsa-mir-4503     | 0.211634114 | -0.137253353 | 0.30707056  | -0.446977179 | 0.654891537  | NA          |
| hsa-mir-450b-3p  | 0.122034101 | 0.11650136    | 0.306970399 | 0.379519849  | 0.704301868   | NA | NA | hsa-mir-450b-3p  | 0.122034101 | 0            | 0.306970399 | 0            | 1            | NA          |
| hsa-mir-4517     | 0.398259471 | -0.354370034  | 0.34102533  | -1.039131121 | 0.298743759   | NA | NA | hsa-mir-4517     | 0.398259471 | -0.316744642 | 0.34102533  | -0.928800923 | 0.352992266  | NA          |
| hsa-mir-451a     | 0.514269877 | 0.1944450766  | 0.308123229 | 0.631081166  | 0.527987455   | NA | NA | hsa-mir-451a     | 0.514269877 | 0.182025277  | 0.30773862  | 0.591493122  | 0.554190662  | NA          |
| hsa-mir-4520-5p  | 0.124659738 | 0.11650136    | 0.306970399 | 0.379519849  | 0.704301868   | NA | NA | hsa-mir-4520-5p  | 0.124659738 | 0            | 0.306970399 | 0            | 1            | NA          |
| hsa-mir-4524a-3p | 0.249663419 | -0.202705843  | 0.307229222 | -1.346363969 | 0.178185165   | NA | NA | hsa-mir-4524a-3p | 0.249663419 | -0.172518639 | 0.307229222 | -0.561530698 | 0.574443581  | NA          |
| hsa-mir-4529-3p  | 0.504438044 | 0.485232771   | 0.360402374 | 1.346363969  | 0.178185165   | NA | NA | hsa-mir-4529-3p  | 0.504438044 | 0            | 0.358288582 | 0            | 1            | NA          |
| hsa-mir-4635     | 0.136617896 | -0.07184708   | 0.306970399 | 0.379519849  | 0.704301868   | NA | NA | hsa-mir-4635     | 0.136617896 | -0.041659876 | 0.306970399 | -0.135713007 | 0.892048165  | NA          |
| hsa-mir-4636     | 0.124659738 | 0.11650136    | 0.306970399 | 0.379519849  | 0.704301868   | NA | NA | hsa-mir-4636     | 0.124659738 | 0            | 0.306970399 | 0            | 1            | NA          |
| hsa-mir-4651     | 0.083511147 | -0.07184708   | 0.306970399 | 0.234052142  | 0.814944499   | NA | NA | hsa-mir-4651     | 0.083511147 | -0.041659876 | 0.306970399 | -0.135713007 | 0.892048165  | NA          |
| hsa-mir-4654     | 0.400941932 | 0.369757747   | 0.378735992 | 0.974625142  | 0.328918701   | NA | NA | hsa-mir-4654     | 0.400941932 | 0.281668264  | 0.375800589 | 0.749515228  | 0.4453546724 | 0.623727088 |
| hsa-mir-4657     | 0.221536363 | -0.167440767  | 0.30707056  | -0.545284238 | 0.585557975   | NA | NA | hsa-mir-4657     | 0.221536363 | -0.137253563 | 0.30707056  | -0.446977229 | 0.654891465  | NA          |
| hsa-mir-4658     | 0.261884616 | -0.19711993   | 0.30705298  | -0.64181813  | 0.520991277   | NA | NA | hsa-mir-4658     | 0.261884616 | -0.166984227 | 0.307205298 | -0.543554188 | 0.586748292  | NA          |
| hsa-mir-4662a-3p | 0.519765497 | -0.133750808  | 0.394793324 | -0.338786904 | 0.734770268   | NA | NA | hsa-mir-4662a-3p | 0.519765497 | -0.079330135 | 0.393751894 | -0.20147239  | 0.840392917  | NA          |
| hsa-mir-4665-5p  | 0.136617896 | -0.07184708   | 0.306970399 | -0.234052142 | 0.814944499   | NA | NA | hsa-mir-4665-5p  | 0.136617896 | -0.041659876 | 0.306970399 | -0.135713007 | 0.892048165  | NA          |
| hsa-mir-4666a-5p | 0.50002659  | 0             | 0.307241655 | 0            | 1             | NA | NA | hsa-mir-4666a-5p | 0.50002659  | 0.330980666  | 0.307241655 | 1.077264951  | 0.2813161915 | NA          |
| hsa-mir-4667-5p  | 0.323562525 | 0.066706318   | 0.307156324 | 0.217173838  | 0.828072873   | NA | NA | hsa-mir-4667-5p  | 0.323562525 | -0.044367808 | 0.307156324 | -0.044367808 | 0.885147509  | NA          |
| hsa-mir-4670-3p  | 0.12526672  | -0.1189334189 | 0.306970399 | -0.38744514  | 0.69884266921 | NA | NA | hsa-mir-4670-3p  | 0.12526672  | -0.088746986 | 0.306970399 | -0.289106005 | 0.772500258  | NA          |
| hsa-mir-4671-3p  | 0.122034101 | 0.11650136    | 0.306970399 | 0.379519849  | 0.704301868   | NA | NA | hsa-mir-4671-3p  | 0.122034101 | 0            | 0.306970399 | 0            | 1            | NA          |

|                 |             |              |             |              |             |    |                 |             |              |             |              |             |             |    |
|-----------------|-------------|--------------|-------------|--------------|-------------|----|-----------------|-------------|--------------|-------------|--------------|-------------|-------------|----|
| hsa-miR-4672    | 0.785485405 | -0.398215865 | 0.429608695 | -0.926926922 | 0.353964478 | NA | hsa-miR-4672    | 0.785485405 | -0.596069318 | 0.424286889 | -1.404873292 | 0.16005896  | NA          |    |
| hsa-miR-4670    | 0.110768181 | -0.07184708  | 0.306970399 | -0.234052142 | 0.814944999 | NA | hsa-miR-4670    | 0.110768181 | -0.041659876 | 0.306970399 | -0.135713007 | 0.892048165 | NA          |    |
| hsa-miR-4680-5p | 0.208777866 | -0.18875526  | 0.307168243 | -0.614501222 | 0.538884167 | NA | hsa-miR-4680-5p | 0.208777866 | -0.158568057 | 0.307168243 | -0.516225424 | 0.605696975 | NA          |    |
| hsa-miR-4682    | 0.311014184 | 0            | 0.306970399 | 0            | 1           | NA | hsa-miR-4682    | 0.311014184 | 0.240862783  | 0.306970399 | 0.784644979  | 0.43266175  | NA          |    |
| hsa-miR-4684-3p | 0.166152272 | -0.118934189 | 0.306970399 | -0.38744514  | 0.698426691 | NA | hsa-miR-4684-3p | 0.166152272 | -0.088746986 | 0.306970399 | -0.289106005 | 0.772500258 | NA          |    |
| hsa-miR-4685-3p | 0.124659738 | 0.11650136   | 0.306970399 | 0.379519849  | 0.704201868 | NA | hsa-miR-4685-3p | 0.124659738 | 0            | 0.306970399 | 0            | 1           | NA          |    |
| hsa-miR-4691-3p | 0.211634114 | -0.167440736 | 0.30707056  | -0.545284238 | 0.585558043 | NA | hsa-miR-4691-3p | 0.211634114 | -0.137253533 | 0.30707056  | -0.446977179 | 0.654891537 | NA          |    |
| hsa-miR-4700-3p | 0.124659738 | 0.11650136   | 0.306970399 | 0.379519849  | 0.704201868 | NA | hsa-miR-4700-3p | 0.124659738 | 0            | 0.306970399 | 0            | 1           | NA          |    |
| hsa-miR-4706    | 0.110768181 | -0.07184708  | 0.306970399 | -0.234052142 | 0.814944999 | NA | hsa-miR-4706    | 0.110768181 | -0.041659876 | 0.306970399 | -0.135713007 | 0.892048165 | NA          |    |
| hsa-miR-4709-3p | 0.592966584 | -0.276452186 | 0.359257928 | -0.769508936 | 0.441591242 | NA | hsa-miR-4709-3p | 0.592966584 | -0.639175285 | 0.357698386 | -1.015311502 | 0.309957363 | NA          |    |
| hsa-miR-4709-5p | 0.286976277 | -0.07184708  | 0.306970399 | -0.234052142 | 0.814944999 | NA | hsa-miR-4709-5p | 0.286976277 | 0.052514344  | 0.306970399 | 0.171072988  | 0.864166375 | NA          |    |
| hsa-miR-4726-5p | 0.385411468 | -0.16629756  | 0.307640969 | -0.540557261 | 0.588812783 | NA | hsa-miR-4726-5p | 0.385411468 | -0.041936137 | 0.307640969 | -0.136315188 | 0.891572118 | NA          |    |
| hsa-miR-4728-3p | 0.110342676 | -0.07184708  | 0.306970399 | -0.234052142 | 0.814944999 | NA | hsa-miR-4728-3p | 0.110342676 | -0.041659876 | 0.306970399 | -0.135713007 | 0.892048165 | NA          |    |
| hsa-miR-4733-3p | 0.167022293 | -0.159866278 | 0.307034494 | -0.520678558 | 0.602590714 | NA | hsa-miR-4733-3p | 0.167022293 | -0.129679074 | 0.307034494 | -0.422359952 | 0.672762305 | NA          |    |
| hsa-miR-4733-5p | 0.459505525 | 0.043661807  | 0.341957428 | 0.127681996  | 0.898400639 | NA | hsa-miR-4733-5p | 0.459505525 | 0.141174575  | 0.341948158 | 0.412853738  | 0.679713777 | NA          |    |
| hsa-miR-4733-5p | 0.155507092 | 0            | 0.306970399 | 0            | 1           | NA | hsa-miR-4733-5p | 0.155507092 | 0.146688563  | 0.306970399 | 0.477858984  | 0.632750576 | NA          |    |
| hsa-miR-4747-5p | 0.100865933 | -0.07184708  | 0.306970399 | -0.234052142 | 0.814944999 | NA | hsa-miR-4747-5p | 0.100865933 | -0.041659876 | 0.306970399 | -0.135713007 | 0.892048165 | NA          |    |
| hsa-miR-4748    | 0.344465606 | -0.064660099 | 0.307505519 | -0.210272971 | 0.83345463  | NA | hsa-miR-4748    | 0.344465606 | -0.128647115 | 0.307505519 | -0.418357093 | 0.675686052 | NA          |    |
| hsa-miR-4749-3p | 0.110342676 | -0.07184708  | 0.306970399 | -0.234052142 | 0.814944999 | NA | hsa-miR-4749-3p | 0.110342676 | -0.041659876 | 0.306970399 | -0.135713007 | 0.892048165 | NA          |    |
| hsa-miR-4753-5p | 0.821756283 | -0.21455763  | 0.422266191 | -0.50786935  | 0.611544971 | NA | hsa-miR-4753-5p | 0.821756283 | -0.496296058 | 0.416549998 | -1.197444147 | 0.233479271 | 0.404038738 |    |
| hsa-miR-4755-5p | 0.336900834 | -0.302560375 | 0.330443134 | -0.9156201   | 0.35966185  | NA | hsa-miR-4755-5p | 0.336900834 | -0.267343963 | 0.330443134 | -0.809044924 | 0.41848266  | NA          |    |
| hsa-miR-4758-3p | 0.459180842 | -0.144676393 | 0.309011235 | -0.468191369 | 0.639647744 | NA | hsa-miR-4758-3p | 0.459180842 | -0.205171635 | 0.308774278 | -0.66441265  | 0.506388734 | NA          |    |
| hsa-miR-4762-3p | 0.260144748 | -0.07184708  | 0.306970399 | -0.234052142 | 0.814944999 | NA | hsa-miR-4762-3p | 0.260144748 | 0.052514344  | 0.306970399 | 0.171072988  | 0.864166375 | NA          |    |
| hsa-miR-4763-5p | 0.124659738 | 0.11650136   | 0.306970399 | 0.379519849  | 0.704201868 | NA | hsa-miR-4763-5p | 0.124659738 | 0            | 0.306970399 | 0            | 1           | NA          |    |
| hsa-miR-4765    | 0.100865933 | -0.07184708  | 0.306970399 | -0.234052142 | 0.814944999 | NA | hsa-miR-4765    | 0.100865933 | -0.041659876 | 0.306970399 | -0.135713007 | 0.892048165 | NA          |    |
| hsa-miR-4766-5p | 0.275945682 | 0.11650136   | 0.306970399 | 0.379519849  | 0.704201868 | NA | hsa-miR-4766-5p | 0.275945682 | 0.146688563  | 0.306970399 | 0.477858984  | 0.632750576 | NA          |    |
| hsa-miR-4769-3p | 0.122034101 | 0.11650136   | 0.306970399 | 0.379519849  | 0.704201868 | NA | hsa-miR-4769-3p | 0.122034101 | 0            | 0.306970399 | 0            | 1           | NA          |    |
| hsa-miR-4769-5p | 0.165514013 | -0.118934189 | 0.306970399 | -0.38744514  | 0.698426691 | NA | hsa-miR-4769-5p | 0.165514013 | -0.088746986 | 0.306970399 | -0.289106005 | 0.772500258 | NA          |    |
| hsa-miR-4772-3p | 0.142146566 | 0.11650136   | 0.306970399 | 0.379519849  | 0.704201868 | NA | hsa-miR-4772-3p | 0.142146566 | 0.306970399  | 0.306970399 | 0.306970399  | 0           | 1           | NA |
| hsa-miR-4773    | 0.748178161 | -0.134000266 | 0.40492124  | -0.330929211 | 0.740697957 | NA | hsa-miR-4773    | 0.748178161 | 0.067940207  | 0.403416151 | 0.168412214  | 0.866259    | NA          |    |
| hsa-miR-4774-5p | 0.278764463 | 0.02232714   | 0.306970399 | 0.072733853  | 0.942017909 | NA | hsa-miR-4774-5p | 0.278764463 | -0.041659876 | 0.306970399 | -0.135713007 | 0.892048165 | NA          |    |
| hsa-miR-4776-5p | 0.214100611 | -0.163588469 | 0.306970399 | -0.532912847 | 0.594093912 | NA | hsa-miR-4776-5p | 0.214100611 | -0.041659876 | 0.306970399 | -0.135713007 | 0.892048165 | NA          |    |
| hsa-miR-4778-3p | 0.110342676 | -0.07184708  | 0.306970399 | -0.234052142 | 0.814944999 | NA | hsa-miR-4778-3p | 0.110342676 | -0.297798891 | 0.309179385 | -0.96319129  | 0.335451535 | NA          |    |
| hsa-miR-4782-5p | 0.494772156 | -0.327384628 | 0.309223083 | -1.058732825 | 0.289721474 | NA | hsa-miR-4782-5p | 0.494772156 | -0.041659876 | 0.306970399 | -0.135713007 | 0.892048165 | NA          |    |
| hsa-miR-4787-3p | 0.161696494 | 0            | 0.306970399 | 0            | 1           | NA | hsa-miR-4787-3p | 0.161696494 | 0.146688563  | 0.306970399 | 0.477858984  | 0.632750576 | NA          |    |
| hsa-miR-4788    | 0.644413814 | -0.557760359 | 0.416404077 | -1.339469014 | 0.180418035 | NA | hsa-miR-4788    | 0.644413814 | -0.326678395 | 0.415633528 | -0.785977003 | 0.43188096  | NA          |    |
| hsa-miR-4792    | 0.233260638 | 0            | 0.306970399 | 0            | 1           | NA | hsa-miR-4792    | 0.233260638 | 0.193775673  | 0.306970399 | 0.631251982  | 0.527875778 | NA          |    |
| hsa-miR-4793-3p | 0.92604232  | 0.089147284  | 0.416408918 | 0.214085915  | 0.83048006  | NA | hsa-miR-4793-3p | 0.92604232  | 0.286510634  | 0.415105096 | 0.690212277  | 0.490060704 | 0.652015697 |    |
| hsa-miR-4793-3p | 0.462935288 | 0.238441503  | 0.30809765  | 0.773915357  | 0.438980848 | NA | hsa-miR-4793-3p | 0.462935288 | 0.136282652  | 0.307652299 | 0.442976219  | 0.657782936 | NA          |    |
| hsa-miR-4802-5p | 0.083511147 | -0.07184708  | 0.306970399 | -0.234052142 | 0.814944999 | NA | hsa-miR-4802-5p | 0.083511147 | -0.041659876 | 0.306970399 | -0.135713007 | 0.892048165 | NA          |    |
| hsa-miR-4803    | 0.155507092 | 0            | 0.306970399 | 0            | 1           | NA | hsa-miR-4803    | 0.155507092 | 0.146688563  | 0.306970399 | 0.477858984  | 0.632750576 | NA          |    |
| hsa-miR-4804-3p | 0.083511147 | -0.07184708  | 0.306970399 | -0.234052142 | 0.814944999 | NA | hsa-miR-4804-3p | 0.083511147 | -0.041659876 | 0.306970399 | -0.135713007 | 0.892048165 | NA          |    |
| hsa-miR-487a-3p | 0.221110857 | -0.167440736 | 0.30707056  | -0.545284238 | 0.585558043 | NA | hsa-miR-487a-3p | 0.221110857 | -0.137253533 | 0.30707056  | -0.446977179 | 0.654891537 | NA          |    |
| hsa-miR-490-3p  | 0.292163308 | 0            | 0.306970399 | 0            | 1           | NA | hsa-miR-490-3p  | 0.292163308 | 0.193775673  | 0.306970399 | 0.631251982  | 0.527875778 | NA          |    |
| hsa-miR-491-3p  | 0.506444141 | 0.148382171  | 0.308037433 | 0.48170175   | 0.630017833 | NA | hsa-miR-491-3p  | 0.506444141 | 0.228669433  | 0.307676771 | 0.742995848  | 0.457848194 | NA          |    |
| hsa-miR-491-5p  | 0.344028819 | -0.07455997  | 0.307156624 | -0.242726556 | 0.808217234 | NA | hsa-miR-491-5p  | 0.344028819 | 0.096893536  | 0.307156324 | 0.315453496  | 0.752417355 | NA          |    |
| hsa-miR-4999-5p | 0.317451171 | -0.248794599 | 0.307785421 | -0.80837828  | 0.418896132 | NA | hsa-miR-4999-5p | 0.317451171 | -0.218607395 | 0.307785421 | -0.710259097 | 0.47754348  | NA          |    |
| hsa-miR-5002-5p | 0.833032506 | 0.27073649   | 0.454309031 | 0.59593024   | 0.551221864 | NA | hsa-miR-5002-5p | 0.833032506 | 0.243341261  | 0.450295641 | 0.540403325  | 0.588918915 | 0.735675237 |    |
| hsa-miR-5003-3p | 0.260369841 | 0.210675579  | 0.306970399 | 0.686305844  | 0.492520763 | NA | hsa-miR-5003-3p | 0.260369841 | 0            | 0.306970399 | 0            | 1           | NA          |    |
| hsa-miR-5003-5p | 0.136617896 | -0.07184708  | 0.306970399 | -0.234052142 | 0.814944999 | NA | hsa-miR-5003-5p | 0.136617896 | -0.041659876 | 0.306970399 | -0.135713007 | 0.892048165 | NA          |    |
| hsa-miR-5004-5p | 0.142146566 | 0.11650136   | 0.306970399 | 0.379519849  | 0.704201868 | NA | hsa-miR-5004-5p | 0.142146566 | 0            | 0.306970399 | 0            | 1           | NA          |    |

|                 |             |              |             |              |             |    |    |    |                 |             |              |              |              |              |             |    |    |    |
|-----------------|-------------|--------------|-------------|--------------|-------------|----|----|----|-----------------|-------------|--------------|--------------|--------------|--------------|-------------|----|----|----|
| hsa-miR-5006-3p | 0.366102304 | 0.298976566  | 0.307324989 | 0.972835196  | NA          | NA | NA | NA | hsa-miR-5006-3p | 0.366102304 | 0.307230735  | 0            | 0.307230735  | 0            | NA          | NA | NA |    |
| hsa-miR-500b-3p | 0.151298899 | -0.118934189 | 0.306970399 | -0.38744514  | 0.698426691 | NA | NA | NA | hsa-miR-500b-3p | 0.151298899 | 0.306970399  | -0.289106005 | 0.306970399  | -0.289106005 | 0.772500258 | NA | NA |    |
| hsa-miR-507     | 0.268922045 | 0.11650136   | 0.306970399 | 0.379519849  | 0.704301868 | NA | NA | NA | hsa-miR-507     | 0.268922045 | 0.146688563  | 0.146688563  | 0.306970399  | 0.477858984  | 0.632750576 | NA | NA |    |
| hsa-miR-5087    | 0.161696494 | 0.161696494  | 0.306970399 | 0            | 1           | NA | NA | NA | hsa-miR-5087    | 0.161696494 | 0.146688563  | 0.146688563  | 0.306970399  | 0.477858984  | 0.632750576 | NA | NA |    |
| hsa-miR-5088-5p | 0.166152272 | -0.118934189 | 0.306970399 | -0.38744514  | 0.698426691 | NA | NA | NA | hsa-miR-5088-5p | 0.166152272 | -0.088746986 | 0.306970399  | -0.289106005 | 0.772500258  | NA          | NA | NA |    |
| hsa-miR-5089-5p | 0.155507092 | 0.155507092  | 0.306970399 | 0            | 1           | NA | NA | NA | hsa-miR-5089-5p | 0.155507092 | 0.146688563  | 0.306970399  | 0.477858984  | 0.632750576  | NA          | NA | NA |    |
| hsa-miR-5090-5p | 0.24902516  | -0.202705843 | 0.307229222 | -0.659786988 | 0.509390535 | NA | NA | NA | hsa-miR-5090-5p | 0.24902516  | -0.172518639 | 0.306970399  | -0.172518639 | 0.561530698  | 0.57443581  | NA | NA |    |
| hsa-miR-5100    | 0.213219849 | 0.163588469  | 0.306970399 | 0.532912847  | 0.594093912 | NA | NA | NA | hsa-miR-5100    | 0.213219849 | 0.306970399  | 0            | 0.306970399  | 0            | 1           | NA | NA |    |
| hsa-miR-512-3p  | 0.421782365 | -0.079092922 | 0.307446992 | -0.257257101 | 0.796880307 | NA | NA | NA | hsa-miR-512-3p  | 0.421782365 | 0.139442721  | 0.307446992  | 0.453550448  | 0.650152426  | NA          | NA | NA |    |
| hsa-miR-513a-3p | 0.559220104 | 0.101239246  | 0.307891369 | 0.328814824  | 0.742295658 | NA | NA | NA | hsa-miR-513a-3p | 0.559220104 | 0.275780849  | 0.30765229   | 0.866075395  | 0.370212497  | NA          | NA | NA |    |
| hsa-miR-515-5p  | 0.323392989 | 0.323392989  | 0.306970399 | 0            | 0           | NA | NA | NA | hsa-miR-515-5p  | 0.323392989 | 0.298314391  | 0.323392989  | 0.171072988  | 0.864166375  | NA          | NA | NA |    |
| hsa-miR-5189-3p | 0.330897224 | -0.279730243 | 0.32749693  | -0.854146153 | 0.930204014 | NA | NA | NA | hsa-miR-5189-3p | 0.330897224 | -0.245126269 | 0.32749693   | -0.748484173 | 0.454168168  | NA          | NA | NA |    |
| hsa-miR-5189-5p | 0.50920632  | 0.148239416  | 0.3535418   | 0.419298131  | 0.674998262 | NA | NA | NA | hsa-miR-5189-5p | 0.50920632  | 0.379645005  | 0.353338533  | 1.074451185  | 0.282620512  | NA          | NA | NA |    |
| hsa-miR-518a-5p | 0.221110857 | 0.167440736  | 0.30707056  | 0.545284238  | 0.585558043 | NA | NA | NA | hsa-miR-518a-5p | 0.221110857 | -0.137253533 | 0.30707056   | -0.446977179 | 0.654891537  | NA          | NA | NA |    |
| hsa-miR-5191    | 0.258651998 | 0.02232714   | 0.306970399 | 0.0727233853 | 0.942017909 | NA | NA | NA | hsa-miR-5191    | 0.258651998 | -0.041659876 | 0.306970399  | -0.135713007 | 0.892048165  | NA          | NA | NA |    |
| hsa-miR-519c-3p | 0.142146566 | 0.11650136   | 0.306970399 | 0.379519849  | 0.704301868 | NA | NA | NA | hsa-miR-519c-3p | 0.142146566 | 0            | 0.306970399  | 0            | 0            | 1           | NA | NA |    |
| hsa-miR-520g-3p | 0.151285944 | 0            | 0.306970399 | 0            | 1           | NA | NA | NA | hsa-miR-520g-3p | 0.151285944 | 0.146688563  | 0.306970399  | 0.477858984  | 0.632750576  | NA          | NA | NA |    |
| hsa-miR-521     | 0.194279328 | -0.162817448 | 0.307048632 | -0.530265993 | 0.95927521  | NA | NA | NA | hsa-miR-521     | 0.194279328 | -0.132630244 | 0.307048632  | -0.431951914 | 0.665776363  | NA          | NA | NA |    |
| hsa-miR-539-3p  | 0.708885084 | -0.859784233 | 0.443295415 | -1.93952882  | 0.052436979 | NA | NA | NA | hsa-miR-539-3p  | 0.708885084 | -0.7986464   | 0.442668977  | -1.804162668 | 0.071205967  | NA          | NA | NA |    |
| hsa-miR-543     | 0.110342676 | -0.07184708  | 0.306970399 | -0.234052142 | 0.81494499  | NA | NA | NA | hsa-miR-543     | 0.110342676 | -0.041659876 | 0.306970399  | -0.135713007 | 0.892048165  | NA          | NA | NA |    |
| hsa-miR-544b    | 0.204926845 | -0.118934189 | 0.306970399 | -0.38744514  | 0.698426691 | NA | NA | NA | hsa-miR-544b    | 0.204926845 | -0.088746986 | 0.306970399  | -0.289106005 | 0.772500258  | NA          | NA | NA |    |
| hsa-miR-548a    | 0.396507404 | -0.158843327 | 0.307505519 | -0.516525125 | 0.60286796  | NA | NA | NA | hsa-miR-548a    | 0.396507404 | -0.034472903 | 0.307505519  | -0.422104991 | 0.91074016   | NA          | NA | NA |    |
| hsa-miR-548a-3p | 0.167022293 | -0.15986627  | 0.307034494 | -0.52068538  | 0.620290714 | NA | NA | NA | hsa-miR-548a-3p | 0.167022293 | -0.129679074 | 0.307034494  | -0.442235952 | 0.672762305  | NA          | NA | NA |    |
| hsa-miR-548a-3p | 0.201731865 | -0.167440767 | 0.30707056  | -0.545284238 | 0.585559795 | NA | NA | NA | hsa-miR-548a-3p | 0.201731865 | -0.137253533 | 0.30707056   | -0.446977179 | 0.654891465  | NA          | NA | NA |    |
| hsa-miR-548a    | 0.394635808 | 0.109256158  | 0.307447049 | 0.35356772   | 0.722215588 | NA | NA | NA | hsa-miR-548a    | 0.394635808 | -0.048905778 | 0.307446997  | -0.159070598 | 0.87361323   | NA          | NA | NA |    |
| hsa-miR-548a    | 0.08351147  | -0.07184708  | 0.306970399 | -0.234052142 | 0.81494499  | NA | NA | NA | hsa-miR-548a    | 0.08351147  | -0.041659876 | 0.306970399  | -0.135713007 | 0.892048165  | NA          | NA | NA |    |
| hsa-miR-548c-3p | 0.184377079 | -0.162817448 | 0.307048632 | -0.530265993 | 0.95927521  | NA | NA | NA | hsa-miR-548c-3p | 0.184377079 | -0.132630244 | 0.307048632  | -0.431951914 | 0.665776363  | NA          | NA | NA |    |
| hsa-miR-548g-5p | 0.268000461 | -0.013377638 | 0.307137464 | -0.043555865 | 0.965258321 | NA | NA | NA | hsa-miR-548g-5p | 0.268000461 | -0.077364654 | 0.307137464  | -0.251889343 | 0.801126597  | NA          | NA | NA |    |
| hsa-miR-548h-5p | 0.664394766 | -0.427794695 | 0.369830918 | -1.156730481 | 0.247382492 | NA | NA | NA | hsa-miR-548h-5p | 0.664394766 | -0.260892691 | 0.368781194  | -0.707445756 | 0.479289511  | NA          | NA | NA |    |
| hsa-miR-548i    | 0.29403264  | -0.028207008 | 0.307203412 | -0.091818668 | 0.926842112 | NA | NA | NA | hsa-miR-548i    | 0.29403264  | -0.092194024 | 0.307203412  | -0.300107423 | 0.764095218  | NA          | NA | NA |    |
| hsa-miR-548j-5p | 0.540253998 | -0.481349742 | 0.36289102  | -1.32643057  | 0.184697119 | NA | NA | NA | hsa-miR-548j-5p | 0.540253998 | -0.43931524  | 0.362829508  | -1.210803504 | 0.225970722  | NA          | NA | NA |    |
| hsa-miR-548y    | 0.221110857 | -0.167440736 | 0.30707056  | -0.545284238 | 0.585558043 | NA | NA | NA | hsa-miR-548y    | 0.221110857 | -0.137253533 | 0.30707056   | -0.446977179 | 0.654891537  | NA          | NA | NA |    |
| hsa-miR-549a    | 0.794851206 | 0            | 0.31088275  | 0            | NA          | NA | NA | NA | hsa-miR-549a    | 0.794851206 | 0.310992573  | 1.278120233  | NA           | NA           | NA          | NA | NA |    |
| hsa-miR-551b-5p | 0.866387716 | -0.214157928 | 0.466321736 | -0.459249294 | 0.646055156 | NA | NA | NA | hsa-miR-551b-5p | 0.866387716 | -0.616883667 | 0.45757165   | -1.344821114 | 0.177590483  | 0.331701454 | NA | NA | NA |
| hsa-miR-556-3p  | 0.629707497 | -0.261175782 | 0.414194869 | -0.630562571 | 0.528326578 | NA | NA | NA | hsa-miR-556-3p  | 0.629707497 | -0.45774075  | 0.410569467  | -1.144892343 | 0.264896558  | NA          | NA | NA |    |
| hsa-miR-5579-3p | 0.436734278 | -0.157359462 | 0.339840107 | -0.463039701 | 0.643335921 | NA | NA | NA | hsa-miR-5579-3p | 0.436734278 | -0.238029069 | 0.339635329  | -0.700837188 | 0.483404627  | NA          | NA | NA |    |
| hsa-miR-5580-5p | 0.467015359 | 0.208069871  | 0.344914937 | 0.603249814  | 0.546342514 | NA | NA | NA | hsa-miR-5580-5p | 0.467015359 | -0.063605692 | 0.343810941  | -0.185001942 | 0.853227513  | NA          | NA | NA |    |
| hsa-miR-5582-5p | 0.124659738 | 0.11650136   | 0.306970399 | 0.379519849  | 0.704301868 | NA | NA | NA | hsa-miR-5582-5p | 0.124659738 | 0            | 0.306970399  | 0            | 1            | NA          | NA | NA |    |
| hsa-miR-5584-3p | 0.211208608 | -0.167440736 | 0.30707056  | -0.545284238 | 0.585558043 | NA | NA | NA | hsa-miR-5584-3p | 0.211208608 | -0.137253533 | 0.30707056   | -0.446977179 | 0.654891537  | NA          | NA | NA |    |
| hsa-miR-5585-5p | 0.161696494 | 0.161696494  | 0.306970399 | 0            | 0           | NA | NA | NA | hsa-miR-5585-5p | 0.161696494 | 0.146688563  | 0.306970399  | 0.477858984  | 0.632750576  | NA          | NA | NA |    |
| hsa-miR-5587-3p | 0.176454151 | 0.163588469  | 0.306970399 | 0.532912847  | 0.594093912 | NA | NA | NA | hsa-miR-5587-3p | 0.176454151 | 0            | 0.306970399  | 0            | 0            | 1           | NA | NA |    |
| hsa-miR-5588-5p | 0.705184601 | -0.253791847 | 0.369455783 | -0.686934294 | 0.492124135 | NA | NA | NA | hsa-miR-5588-5p | 0.705184601 | -0.395509878 | 0.366329452  | -1.079656238 | 0.280295288  | NA          | NA | NA |    |
| hsa-miR-5683    | 0.151298899 | -0.118934189 | 0.306970399 | -0.38744514  | 0.698426691 | NA | NA | NA | hsa-miR-5683    | 0.151298899 | -0.088746986 | 0.306970399  | -0.289106005 | 0.772500258  | NA          | NA | NA |    |
| hsa-miR-5687    | 0.122034101 | 0.11650136   | 0.306970399 | 0.379519849  | 0.704301868 | NA | NA | NA | hsa-miR-5687    | 0.122034101 | 0.306970399  | 0            | 0.306970399  | 0            | 1           | NA | NA |    |
| hsa-miR-5689    | 0.807265772 | -0.227928892 | 0.371766771 | -0.613094461 | 0.53981256  | NA | NA | NA | hsa-miR-5689    | 0.807265772 | 0.153823998  | 0.371839807  | 0.413683513  | 0.679105903  | 0.806827655 | NA | NA | NA |
| hsa-miR-5690    | 0.795650033 | -0.065966126 | 0.410380999 | -0.160743616 | 0.872295335 | NA | NA | NA | hsa-miR-5690    | 0.795650033 | -0.073422371 | 0.407242991  | -0.180291308 | 0.856923879  | 0.924763686 | NA | NA | NA |
| hsa-miR-580-5p  | 0.518919498 | 0.101494263  | 0.360602147 | 0.256297254  | 0.797719217 | NA | NA | NA | hsa-miR-580-5p  | 0.518919498 | -0.208167312 | 0.393118548  | -0.529393166 | NA           | NA          | NA | NA |    |
| hsa-miR-580     | 0.629531962 | 0.201836818  | 0.408427928 | 0.494174767  | 0.621179232 | NA | NA | NA | hsa-miR-580     | 0.629531962 | -0.215397738 | 0.402984867  | -0.534505783 | 0.5929291657 | NA          | NA | NA |    |
| hsa-miR-598-5p  | 0.083511147 | -0.07184708  | 0.306970399 | -0.234052142 | 0.81494499  | NA | NA | NA | hsa-miR-598-5p  | 0.083511147 | -0.041659876 | 0.306970399  | -0.135713007 | 0.892048165  | NA          | NA | NA |    |
| hsa-miR-602     | 0.220685351 | -0.167440767 | 0.30707056  | -0.545284337 | 0.585557975 | NA | NA | NA | hsa-miR-602     | 0.220685351 | -0.137253563 | 0.30707056   | -0.446977279 | 0.654891465  | NA          | NA | NA |    |

|                  |             |              |             |              |             |    |                  |             |              |             |              |             |    |
|------------------|-------------|--------------|-------------|--------------|-------------|----|------------------|-------------|--------------|-------------|--------------|-------------|----|
| hsa-miR-622      | 0.176454151 | 0.163588469  | 0.306970399 | 0.532912847  | 0.594093912 | NA | hsa-miR-622      | 0.176454151 | 0.163588469  | 0.306970399 | 0.532912847  | 0.594093912 | NA |
| hsa-miR-623      | 0.362843742 | 0.038376198  | 0.328133982 | 0.116955927  | 0.906492602 | NA | hsa-miR-623      | 0.362843742 | 0.038376198  | 0.328133982 | 0.116955927  | 0.906492602 | NA |
| hsa-miR-642b-3p  | 0.136617896 | -0.07184708  | 0.306970399 | -0.234052142 | 0.814944999 | NA | hsa-miR-642b-3p  | 0.136617896 | -0.07184708  | 0.306970399 | -0.234052142 | 0.814944999 | NA |
| hsa-miR-6501-3p  | 0.124659738 | 0.11650136   | 0.306970399 | 0.379519849  | 0.704301868 | NA | hsa-miR-6501-3p  | 0.124659738 | 0.11650136   | 0.306970399 | 0.379519849  | 0.704301868 | NA |
| hsa-miR-6502-5p  | 0.319367342 | 0.11650136   | 0.306970399 | 0.379519849  | 0.704301868 | NA | hsa-miR-6502-5p  | 0.319367342 | 0.11650136   | 0.306970399 | 0.379519849  | 0.704301868 | NA |
| hsa-miR-6505-3p  | 0.176633601 | 0.11650136   | 0.306970399 | 0            | 1 NA        | NA | hsa-miR-6505-3p  | 0.176633601 | 0.11650136   | 0.306970399 | 0            | 1 NA        | NA |
| hsa-miR-6508-3p  | 0.117636101 | 0.11650136   | 0.306970399 | 0.379519849  | 0.704301868 | NA | hsa-miR-6508-3p  | 0.117636101 | 0.11650136   | 0.306970399 | 0.379519849  | 0.704301868 | NA |
| hsa-miR-6510-3p  | 0.124659738 | 0.11650136   | 0.306970399 | 0.379519849  | 0.704301868 | NA | hsa-miR-6510-3p  | 0.124659738 | 0.11650136   | 0.306970399 | 0.379519849  | 0.704301868 | NA |
| hsa-miR-6511a-3p | 0.110768181 | -0.07184708  | 0.306970399 | -0.234052142 | 0.814944999 | NA | hsa-miR-6511a-3p | 0.110768181 | -0.07184708  | 0.306970399 | -0.234052142 | 0.814944999 | NA |
| hsa-miR-6511a-5p | 0.367811461 | -0.099523361 | 0.307298821 | -0.323865093 | 0.746040172 | NA | hsa-miR-6511a-5p | 0.367811461 | -0.099523361 | 0.307298821 | -0.323865093 | 0.746040172 | NA |
| hsa-miR-6511b-3p | 0.186989606 | 0.163588469  | 0.306970399 | 0.532912847  | 0.594093912 | NA | hsa-miR-6511b-3p | 0.186989606 | 0.163588469  | 0.306970399 | 0.532912847  | 0.594093912 | NA |
| hsa-miR-6513-3p  | 0.100865933 | -0.07184708  | 0.306970399 | -0.234052142 | 0.814944999 | NA | hsa-miR-6513-3p  | 0.100865933 | -0.07184708  | 0.306970399 | -0.234052142 | 0.814944999 | NA |
| hsa-miR-6516-5p  | 0.754520144 | 0.022424516  | 0.417047987 | 0.053769631  | 0.957118706 | NA | hsa-miR-6516-5p  | 0.754520144 | 0.022424516  | 0.417047987 | 0.053769631  | 0.957118706 | NA |
| hsa-miR-653-3p   | 0.167022293 | -0.159866278 | 0.307034494 | -0.520678558 | 0.602590714 | NA | hsa-miR-653-3p   | 0.167022293 | -0.159866278 | 0.307034494 | -0.520678558 | 0.602590714 | NA |
| hsa-miR-664b-3p  | 0.117636101 | 0.11650136   | 0.306970399 | 0.379519849  | 0.704301868 | NA | hsa-miR-664b-3p  | 0.117636101 | 0.11650136   | 0.306970399 | 0.379519849  | 0.704301868 | NA |
| hsa-miR-664b-5p  | 0.235427919 | 0.02232714   | 0.306970399 | 0.072733853  | 0.942017909 | NA | hsa-miR-664b-5p  | 0.235427919 | 0.02232714   | 0.306970399 | 0.072733853  | 0.942017909 | NA |
| hsa-miR-6721-5p  | 0.521877337 | 0.101239257  | 0.307891368 | 0.328814861  | 0.74229563  | NA | hsa-miR-6721-5p  | 0.521877337 | 0.101239257  | 0.307891368 | 0.328814861  | 0.74229563  | NA |
| hsa-miR-6727-5p  | 0.166152272 | -0.118934189 | 0.306970399 | -0.38744514  | 0.698426691 | NA | hsa-miR-6727-5p  | 0.166152272 | -0.118934189 | 0.306970399 | -0.38744514  | 0.698426691 | NA |
| hsa-miR-6728-5p  | 0.299018239 | -0.07184708  | 0.306970399 | -0.234052142 | 0.814944999 | NA | hsa-miR-6728-5p  | 0.299018239 | -0.07184708  | 0.306970399 | -0.234052142 | 0.814944999 | NA |
| hsa-miR-6730-5p  | 0.637061348 | -0.304034469 | 0.446853331 | -0.680389997 | 0.496657553 | NA | hsa-miR-6730-5p  | 0.637061348 | -0.304034469 | 0.446853331 | -0.680389997 | 0.496657553 | NA |
| hsa-miR-6732-3p  | 0.161696494 | 0.161696494  | 0.306970399 | 0            | 1 NA        | NA | hsa-miR-6732-3p  | 0.161696494 | 0.161696494  | 0.306970399 | 0            | 1 NA        | NA |
| hsa-miR-6733-3p  | 0.124659738 | 0.11650136   | 0.306970399 | 0.379519849  | 0.704301868 | NA | hsa-miR-6733-3p  | 0.124659738 | 0.11650136   | 0.306970399 | 0.379519849  | 0.704301868 | NA |
| hsa-miR-6734-5p  | 0.122034101 | 0.11650136   | 0.306970399 | -0.234052142 | 0.814944999 | NA | hsa-miR-6734-5p  | 0.122034101 | 0.11650136   | 0.306970399 | -0.234052142 | 0.814944999 | NA |
| hsa-miR-6739-5p  | 0.083511147 | -0.07184708  | 0.306970399 | -0.234052142 | 0.814944999 | NA | hsa-miR-6739-5p  | 0.083511147 | -0.07184708  | 0.306970399 | -0.234052142 | 0.814944999 | NA |
| hsa-miR-6740-5p  | 0.124659738 | 0.11650136   | 0.306970399 | 0.379519849  | 0.704301868 | NA | hsa-miR-6740-5p  | 0.124659738 | 0.11650136   | 0.306970399 | 0.379519849  | 0.704301868 | NA |
| hsa-miR-6741-3p  | 0.347073411 | -0.028206981 | 0.307203412 | -0.091818581 | 0.927642181 | NA | hsa-miR-6741-3p  | 0.347073411 | -0.028206981 | 0.307203412 | -0.091818581 | 0.927642181 | NA |
| hsa-miR-6742-3p  | 0.233260638 | 0            | 0.306970399 | 0            | 1 NA        | NA | hsa-miR-6742-3p  | 0.233260638 | 0            | 0.306970399 | 0            | 1 NA        | NA |
| hsa-miR-6743-5p  | 0.176633601 | 0            | 0.306970399 | 0            | 1 NA        | NA | hsa-miR-6743-5p  | 0.176633601 | 0            | 0.306970399 | 0            | 1 NA        | NA |
| hsa-miR-6747-3p  | 0.341544741 | -0.219152157 | 0.307371297 | -0.712988362 | 0.475852959 | NA | hsa-miR-6747-3p  | 0.341544741 | -0.219152157 | 0.307371297 | -0.712988362 | 0.475852959 | NA |
| hsa-miR-6748-3p  | 0.083511147 | -0.07184708  | 0.306970399 | -0.234052142 | 0.814944999 | NA | hsa-miR-6748-3p  | 0.083511147 | -0.07184708  | 0.306970399 | -0.234052142 | 0.814944999 | NA |
| hsa-miR-6750-5p  | 0.12526672  | -0.118934189 | 0.306970399 | -0.38744514  | 0.698426691 | NA | hsa-miR-6750-5p  | 0.12526672  | -0.118934189 | 0.306970399 | -0.38744514  | 0.698426691 | NA |
| hsa-miR-6751-5p  | 0.226928917 | 0.226928917  | 0.306970399 | 0            | 1 NA        | NA | hsa-miR-6751-5p  | 0.226928917 | 0.226928917  | 0.306970399 | 0            | 1 NA        | NA |
| hsa-miR-6753-3p  | 0.122034101 | 0.11650136   | 0.306970399 | 0.379519849  | 0.704301868 | NA | hsa-miR-6753-3p  | 0.122034101 | 0.11650136   | 0.306970399 | 0.379519849  | 0.704301868 | NA |
| hsa-miR-6754-3p  | 0.117636101 | 0.11650136   | 0.306970399 | 0.379519849  | 0.704301868 | NA | hsa-miR-6754-3p  | 0.117636101 | 0.11650136   | 0.306970399 | 0.379519849  | 0.704301868 | NA |
| hsa-miR-6758-3p  | 0.142733741 | 0.11650136   | 0.306970399 | 0.379519849  | 0.704301868 | NA | hsa-miR-6758-3p  | 0.142733741 | 0.11650136   | 0.306970399 | 0.379519849  | 0.704301868 | NA |
| hsa-miR-6761-3p  | 0.122034101 | 0.11650136   | 0.306970399 | 0.379519849  | 0.704301868 | NA | hsa-miR-6761-3p  | 0.122034101 | 0.11650136   | 0.306970399 | 0.379519849  | 0.704301868 | NA |
| hsa-miR-6761-5p  | 0.117636101 | 0.11650136   | 0.306970399 | 0.379519849  | 0.704301868 | NA | hsa-miR-6761-5p  | 0.117636101 | 0.11650136   | 0.306970399 | 0.379519849  | 0.704301868 | NA |
| hsa-miR-6768-5p  | 0.322402295 | -0.251212093 | 0.307827661 | -0.81608031  | 0.414454204 | NA | hsa-miR-6768-5p  | 0.322402295 | -0.251212093 | 0.307827661 | -0.81608031  | 0.414454204 | NA |
| hsa-miR-6770-5p  | 0.531001456 | -0.092643636 | 0.396680229 | -0.233589797 | 0.81530345  | NA | hsa-miR-6770-5p  | 0.531001456 | -0.092643636 | 0.396680229 | -0.233589797 | 0.81530345  | NA |
| hsa-miR-6775-3p  | 1.168653232 | 0            | 0.314592924 | 0            | NA          | NA | hsa-miR-6775-3p  | 1.168653232 | 0            | 0.314592924 | 0            | NA          | NA |
| hsa-miR-6780a-5p | 0.151298899 | -0.118934189 | 0.306970399 | -0.38744514  | 0.698426691 | NA | hsa-miR-6780a-5p | 0.151298899 | -0.118934189 | 0.306970399 | -0.38744514  | 0.698426691 | NA |
| hsa-miR-6783-5p  | 0.3279325   | -0.12238123  | 0.307203412 | -0.39831973  | 0.690356014 | NA | hsa-miR-6783-5p  | 0.3279325   | -0.12238123  | 0.307203412 | -0.39831973  | 0.690356014 | NA |
| hsa-miR-6784-3p  | 0.142733741 | 0.11650136   | 0.306970399 | 0.379519849  | 0.704301868 | NA | hsa-miR-6784-3p  | 0.142733741 | 0.11650136   | 0.306970399 | 0.379519849  | 0.704301868 | NA |
| hsa-miR-6786-3p  | 0.117636101 | 0.11650136   | 0.306970399 | 0.379519849  | 0.704301868 | NA | hsa-miR-6786-3p  | 0.117636101 | 0.11650136   | 0.306970399 | 0.379519849  | 0.704301868 | NA |
| hsa-miR-6787-3p  | 0.083511147 | -0.07184708  | 0.306970399 | -0.234052142 | 0.814944999 | NA | hsa-miR-6787-3p  | 0.083511147 | -0.07184708  | 0.306970399 | -0.234052142 | 0.814944999 | NA |
| hsa-miR-6787-5p  | 0.083511147 | -0.07184708  | 0.306970399 | -0.234052142 | 0.814944999 | NA | hsa-miR-6787-5p  | 0.083511147 | -0.07184708  | 0.306970399 | -0.234052142 | 0.814944999 | NA |
| hsa-miR-6789-5p  | 0.166152272 | -0.118934189 | 0.306970399 | -0.38744514  | 0.698426691 | NA | hsa-miR-6789-5p  | 0.166152272 | -0.118934189 | 0.306970399 | -0.38744514  | 0.698426691 | NA |
| hsa-miR-6791-3p  | 0.194775539 | 0            | 0.306970399 | 0            | 1 NA        | NA | hsa-miR-6791-3p  | 0.194775539 | 0            | 0.306970399 | 0            | 1 NA        | NA |
| hsa-miR-6794-3p  | 0.194775539 | 0            | 0.306970399 | 0            | 1 NA        | NA | hsa-miR-6794-3p  | 0.194775539 | 0            | 0.306970399 | 0            | 1 NA        | NA |
| hsa-miR-6802-5p  | 0.344465606 | -0.064660099 | 0.307505519 | -0.210272971 | 0.83345463  | NA | hsa-miR-6802-5p  | 0.344465606 | -0.064660099 | 0.307505519 | -0.210272971 | 0.83345463  | NA |





stat = the Wald statistic: the  $\log_2$ FoldChange divided by lfcSE, which is compared to a standard normal distribution to generate a two-tailed p-value  
padj = adjusted p-value

**Supplemental Table S4.** Results of microRNA enrichment analysis and annotation (miTEA) performed using the common pool

| Category                                                                | Subcategory                               | Enrichment       | p-value     | expected | observed | miRNAs/precursors                                                                                                                                                                                                                                                                                                                                                                                                                                            |
|-------------------------------------------------------------------------|-------------------------------------------|------------------|-------------|----------|----------|--------------------------------------------------------------------------------------------------------------------------------------------------------------------------------------------------------------------------------------------------------------------------------------------------------------------------------------------------------------------------------------------------------------------------------------------------------------|
| Diseases (miRWalk)                                                      | Asthma                                    | over-represented | 0.0430679   | 1.58333  | 6        | hsa-miR-29c-3p; hsa-let-7f-5p; hsa-miR-26a-5p; hsa-miR-29b-3p; hsa-miR-574-5p; hsa-let-7g-5p                                                                                                                                                                                                                                                                                                                                                                 |
| Diseases (miRWalk)                                                      | Carcinoma                                 | over-represented | 0.0192682   | 16.1987  | 27       | hsa-miR-193a-3p; hsa-miR-29c-3p; hsa-miR-19b-3p; hsa-let-7f-5p; hsa-miR-221-3p; hsa-miR-26a-5p; hsa-miR-218-5p; hsa-miR-29b-3p; hsa-miR-203a-3p; hsa-miR-10b-5p; hsa-miR-137; hsa-miR-374a-5p; hsa-miR-31-5p; hsa-miR-183-5p; hsa-miR-205-5p; hsa-miR-29a-3p; hsa-miR-15a-5p; hsa-miR-26b-5p; hsa-miR-24-3p; hsa-let-7g-5p; hsa-miR-532-5p; hsa-miR-138-5p; hsa-miR-126-3p; hsa-miR-22-3p; hsa-miR-19a-3p; hsa-miR-152-3p; hsa-miR-210-3p                    |
| Diseases (miRWalk)                                                      | Carcinoma Squamous Cell                   | over-represented | 0.0430679   | 5.35897  | 12       | hsa-miR-193a-3p; hsa-miR-221-3p; hsa-miR-203a-3p; hsa-miR-10b-5p; hsa-miR-137; hsa-miR-374a-5p; hsa-miR-31-5p; hsa-miR-205-5p; hsa-miR-15a-5p; hsa-miR-24-3p; hsa-miR-138-5p; hsa-miR-210-3p                                                                                                                                                                                                                                                                 |
| Diseases (miRWalk)                                                      | Hemorrhage                                | over-represented | 0.0430679   | 0.730769 | 4        | hsa-miR-29c-3p; hsa-miR-29b-3p; hsa-miR-29a-3p; hsa-miR-126-3p                                                                                                                                                                                                                                                                                                                                                                                               |
| Diseases (miRWalk)                                                      | Inflammation                              | over-represented | 0.01949     | 5.23718  | 13       | hsa-miR-29c-3p; hsa-miR-19b-3p; hsa-let-7f-5p; hsa-miR-221-3p; hsa-miR-29b-3p; hsa-miR-203a-3p; hsa-miR-31-5p; hsa-miR-574-5p; hsa-let-7g-5p; hsa-miR-532-5p; hsa-miR-126-3p; hsa-miR-22-3p; hsa-miR-19a-3p                                                                                                                                                                                                                                                  |
| Diseases (miRWalk)                                                      | Lung Neoplasms                            | over-represented | 0.01949     | 5.11538  | 13       | hsa-miR-29c-3p; hsa-let-7f-5p; hsa-miR-221-3p; hsa-miR-29b-3p; hsa-miR-137; hsa-miR-31-5p; hsa-miR-183-5p; hsa-miR-29a-3p; hsa-miR-15a-5p; hsa-let-7g-5p; hsa-miR-126-3p; hsa-miR-22-3p; hsa-miR-19a-3p                                                                                                                                                                                                                                                      |
| Diseases (miRWalk)                                                      | Starvation                                | over-represented | 0.0430679   | 0.730769 | 4        | hsa-miR-29c-3p; hsa-miR-29b-3p; hsa-miR-31-5p; hsa-miR-29a-3p                                                                                                                                                                                                                                                                                                                                                                                                |
| Diseases (published studies about miRNA profiles from peripheral blood) | Alzheimers Disease deregulated            | over-represented | 0.000063602 | 13.6957  | 28       | hsa-miR-1260b; hsa-miR-29c-3p; hsa-let-7f-5p; hsa-miR-26a-5p; hsa-miR-339-3p; hsa-miR-589-5p; hsa-miR-29b-3p; hsa-miR-324-5p; hsa-miR-10b-5p; hsa-miR-660-5p; hsa-miR-3200-3p; hsa-miR-374a-5p; hsa-miR-31-5p; hsa-miR-126-5p; hsa-miR-29a-3p; hsa-miR-15a-5p; hsa-miR-210-5p; hsa-miR-26b-5p; hsa-miR-625-5p; hsa-let-7g-5p; hsa-miR-330-5p; hsa-miR-532-5p; hsa-miR-126-3p; hsa-miR-148b-3p; hsa-miR-659-5p; hsa-miR-32-5p; hsa-miR-152-3p; hsa-miR-33b-5p |
| Diseases (published studies about miRNA profiles from peripheral blood) | Alzheimers Disease downregulated          | over-represented | 8.3129E-05  | 5.47826  | 18       | hsa-miR-29c-3p; hsa-let-7f-5p; hsa-miR-29b-3p; hsa-miR-660-5p; hsa-miR-3200-3p; hsa-miR-374a-5p; hsa-miR-31-5p; hsa-miR-126-5p; hsa-miR-29a-3p; hsa-miR-15a-5p; hsa-miR-26b-5p; hsa-let-7g-5p; hsa-miR-532-5p; hsa-miR-126-3p; hsa-miR-148b-3p; hsa-miR-32-5p; hsa-miR-152-3p; hsa-miR-33b-5p                                                                                                                                                                |
| Diseases (published studies about miRNA profiles from peripheral blood) | benign prostate hyperplasia downregulated | over-represented | 0.0278624   | 5.21739  | 12       | hsa-miR-221-3p; hsa-miR-26a-5p; hsa-miR-374b-5p; hsa-miR-660-5p; hsa-miR-374a-5p; hsa-miR-140-3p; hsa-miR-26b-5p; hsa-let-7g-5p; hsa-miR-126-3p; hsa-miR-148b-3p; hsa-miR-32-5p; hsa-miR-33b-5p                                                                                                                                                                                                                                                              |
| Diseases (published studies about miRNA profiles from peripheral blood) | prostate cancer deregulated               | over-represented | 0.0166094   | 15.4565  | 26       | hsa-miR-708-5p; hsa-miR-149-5p; hsa-let-7f-5p; hsa-miR-449b-5p; hsa-miR-26a-5p; hsa-miR-339-5p; hsa-miR-374b-5p; hsa-miR-10b-3p; hsa-miR-29b-3p; hsa-miR-660-5p; hsa-miR-137; hsa-miR-153-3p; hsa-miR-29a-5p; hsa-miR-374a-5p; hsa-miR-26a-2-3p; hsa-miR-126-5p; hsa-miR-26b-5p; hsa-miR-625-5p; hsa-miR-24-3p; hsa-let-7g-5p; hsa-miR-138-5p; hsa-miR-126-3p; hsa-miR-148b-3p; hsa-miR-19a-3p; hsa-miR-32-5p; hsa-miR-33b-5p                                |

|                                                                         |                               |                  |            |         |    |                                                                                                                                                                                                                                                                                                                                                                                                               |
|-------------------------------------------------------------------------|-------------------------------|------------------|------------|---------|----|---------------------------------------------------------------------------------------------------------------------------------------------------------------------------------------------------------------------------------------------------------------------------------------------------------------------------------------------------------------------------------------------------------------|
| Diseases (published studies about miRNA profiles from peripheral blood) | prostate cancer downregulated | over-represented | 0.00774084 | 7.5     | 17 | hsa-let-7f-5p; hsa-miR-26a-5p; hsa-miR-374b-5p; hsa-miR-10b-3p; hsa-miR-29b-3p; hsa-miR-660-5p; hsa-miR-137; hsa-miR-153-5p; hsa-miR-374a-5p; hsa-miR-26b-5p; hsa-miR-24-3p; hsa-let-7g-5p; hsa-miR-126-3p; hsa-miR-148b-3p; hsa-miR-19a-3p; hsa-miR-32-5p; hsa-miR-33b-5p                                                                                                                                    |
| Diseases (published studies about miRNA profiles from peripheral blood) | psoriasis deregulated         | over-represented | 0.0278624  | 15.3913 | 25 | hsa-miR-708-5p; hsa-miR-29c-3p; hsa-miR-19b-3p; hsa-miR-221-3p; hsa-miR-449b-5p; hsa-miR-26a-5p; hsa-miR-374b-5p; hsa-miR-29b-3p; hsa-miR-324-5p; hsa-miR-660-5p; hsa-miR-137; hsa-miR-29a-5p; hsa-miR-374a-5p; hsa-miR-183-5p; hsa-miR-29a-3p; hsa-miR-140-3p; hsa-miR-26b-5p; hsa-let-7g-5p; hsa-miR-330-5p; hsa-miR-532-5p; hsa-miR-10a-3p; hsa-miR-126-3p; hsa-miR-22-3p; hsa-miR-378a-3p; hsa-miR-33b-5p |
| Diseases (published studies about miRNA profiles from peripheral blood) | psoriasis downregulated       | over-represented | 0.00073094 | 7.43478 | 19 | hsa-miR-29c-3p; hsa-miR-221-3p; hsa-miR-26a-5p; hsa-miR-374b-5p; hsa-miR-29b-3p; hsa-miR-324-5p; hsa-miR-660-5p; hsa-miR-137; hsa-miR-374a-5p; hsa-miR-183-5p; hsa-miR-29a-3p; hsa-miR-140-3p; hsa-miR-26b-5p; hsa-let-7g-5p; hsa-miR-532-5p; hsa-miR-126-3p; hsa-miR-22-3p; hsa-miR-378a-3p; hsa-miR-33b-5p                                                                                                  |
| Diseases (published studies about miRNA profiles from peripheral blood) | sarcoidosis downregulated     | over-represented | 0.00911771 | 9.19565 | 19 | hsa-let-7f-5p; hsa-miR-221-3p; hsa-miR-26a-5p; hsa-miR-374b-5p; hsa-miR-940; hsa-miR-660-5p; hsa-miR-374a-5p; hsa-miR-31-5p; hsa-miR-183-5p; hsa-miR-15a-5p; hsa-miR-26b-5p; hsa-miR-24-3p; hsa-let-7g-5p; hsa-miR-532-5p; hsa-miR-126-3p; hsa-miR-148b-3p; hsa-miR-32-5p; hsa-miR-152-3p; hsa-miR-210-3p                                                                                                     |

**Supplemental Table S5.** DIANA mirPATH union results. Analysis was performed using experimentally validated targets (TarBase v6) of miRNAs up-regulated with a log<sub>2</sub> fold-change  $\geq 1.5$  in TSN-knockdown or UPF-knockdown cells relative to Ctl siRNA-treated cells

| KEGG pathway                                             | p-value  | #genes | #miRNAs |
|----------------------------------------------------------|----------|--------|---------|
| Proteoglycans in cancer                                  | 3.54E-13 | 47     | 4       |
| Viral carcinogenesis                                     | 2.12E-11 | 51     | 5       |
| Glioma                                                   | 1.10E-09 | 22     | 5       |
| Non-small cell lung cancer                               | 1.45E-08 | 14     | 3       |
| Chronic myeloid leukemia                                 | 1.77E-08 | 26     | 5       |
| Pancreatic cancer                                        | 4.28E-07 | 19     | 4       |
| Renal cell carcinoma                                     | 1.47E-06 | 26     | 3       |
| Prostate cancer                                          | 6.30E-06 | 26     | 3       |
| Endometrial cancer                                       | 1.09E-05 | 16     | 3       |
| Cell cycle                                               | 2.57E-05 | 34     | 4       |
| Central carbon metabolism in cancer                      | 4.40E-05 | 25     | 4       |
| p53 signaling pathway                                    | 0.000308 | 21     | 3       |
| Pathways in cancer                                       | 0.000369 | 61     | 3       |
| HIF-1 signaling pathway                                  | 0.000604 | 28     | 3       |
| FoxO signaling pathway                                   | 0.001132 | 25     | 2       |
| mTOR signaling pathway                                   | 0.001692 | 13     | 2       |
| Small cell lung cancer                                   | 0.002419 | 12     | 2       |
| Melanoma                                                 | 0.002537 | 12     | 3       |
| Hepatitis B                                              | 0.002979 | 12     | 1       |
| MicroRNAs in cancer                                      | 0.003117 | 32     | 3       |
| Signaling pathways regulating pluripotency of stem cells | 0.003158 | 18     | 2       |
| Estrogen signaling pathway                               | 0.003357 | 28     | 4       |
| Colorectal cancer                                        | 0.004082 | 11     | 2       |
| ErbB signaling pathway                                   | 0.004648 | 26     | 3       |
| Hippo signaling pathway                                  | 0.009316 | 31     | 3       |
| Bladder cancer                                           | 0.012694 | 9      | 2       |
| Oocyte meiosis                                           | 0.013915 | 21     | 2       |
| Prolactin signaling pathway                              | 0.023282 | 9      | 2       |
| Thyroid hormone signaling pathway                        | 0.031722 | 23     | 3       |
| Thyroid cancer                                           | 0.035720 | 9      | 2       |
| Aldosterone-regulated sodium reabsorption                | 0.038500 | 10     | 2       |
| Sphingolipid signaling pathway                           | 0.040423 | 13     | 2       |
| Bacterial invasion of epithelial cells                   | 0.042028 | 12     | 1       |
| Neurotrophin signaling pathway                           | 0.047724 | 18     | 2       |

KEGG, Kyoto Encyclopedia of Genes and Genomes
