# Supplementary figures and images for: UPF1 helicase promotes TSN-mediated miRNA decay
Source: PubMed Central journal article supplement — Genes Dev. 2017 Jul 15;31(14):1483–93. doi: 10.1101/gad.303537.117 (PMC5588929; doi:10.1101/gad.303537.117), 2017-07-15

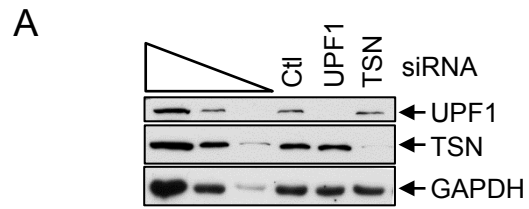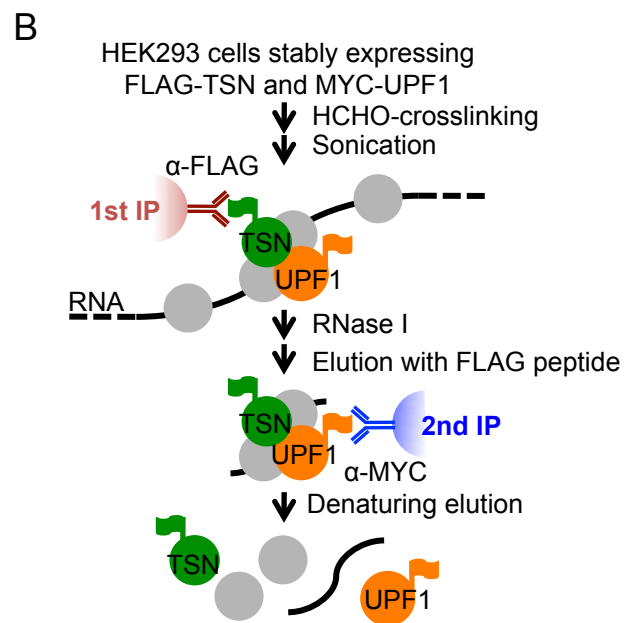

Supplement: supp_gad.303537.117_Supplemental_FigS1.pdf [file supp_gad.303537.117_Supplemental_FigS1.pdf]

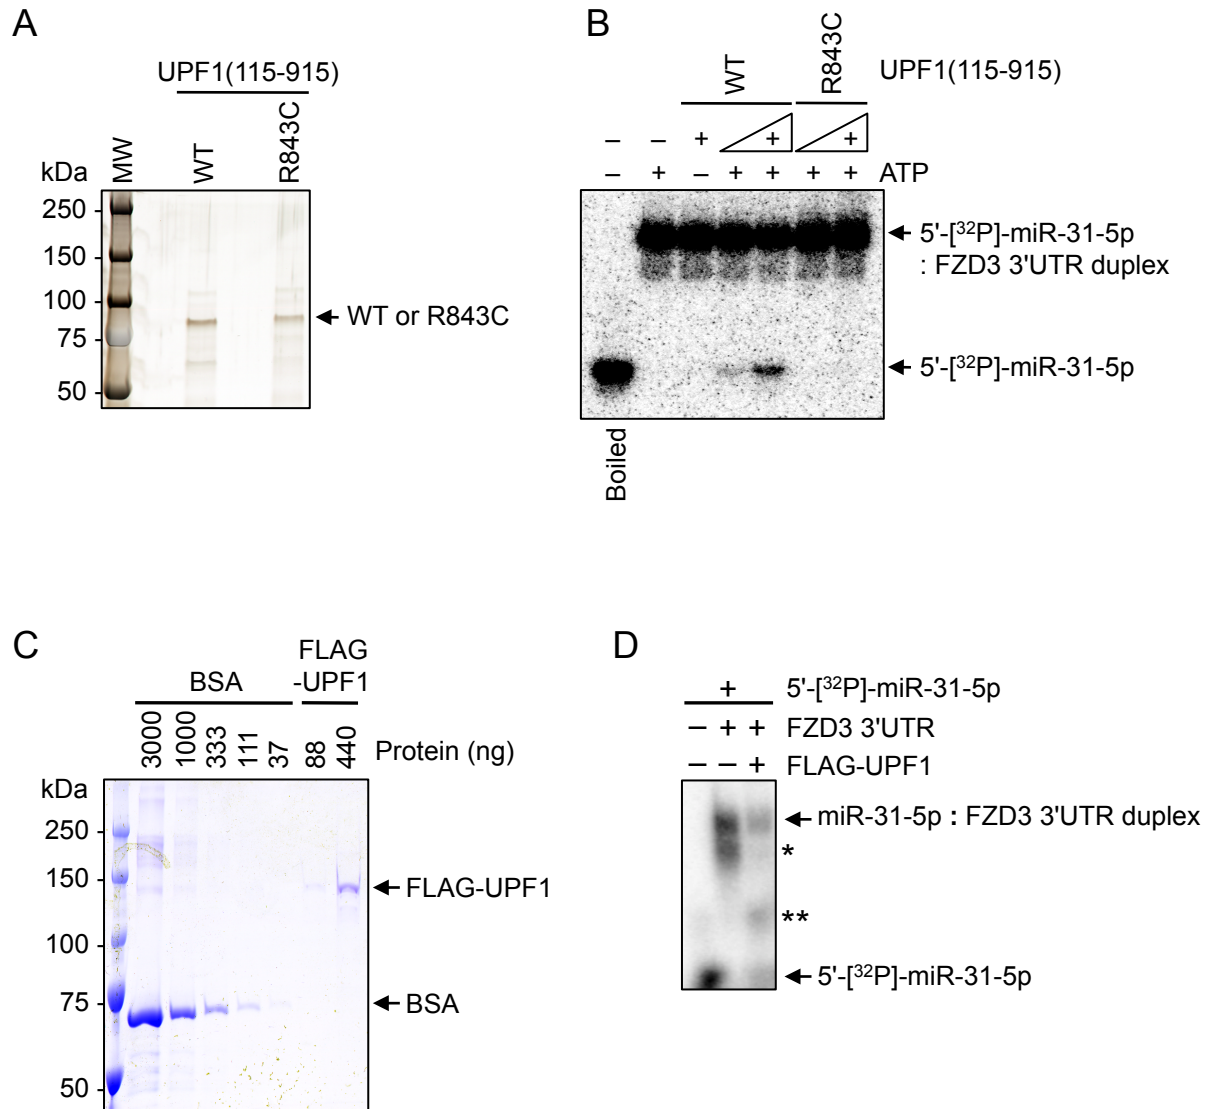

Supplement: supp_gad.303537.117_Supplemental_FigS2.pdf [file supp_gad.303537.117_Supplemental_FigS2.pdf]

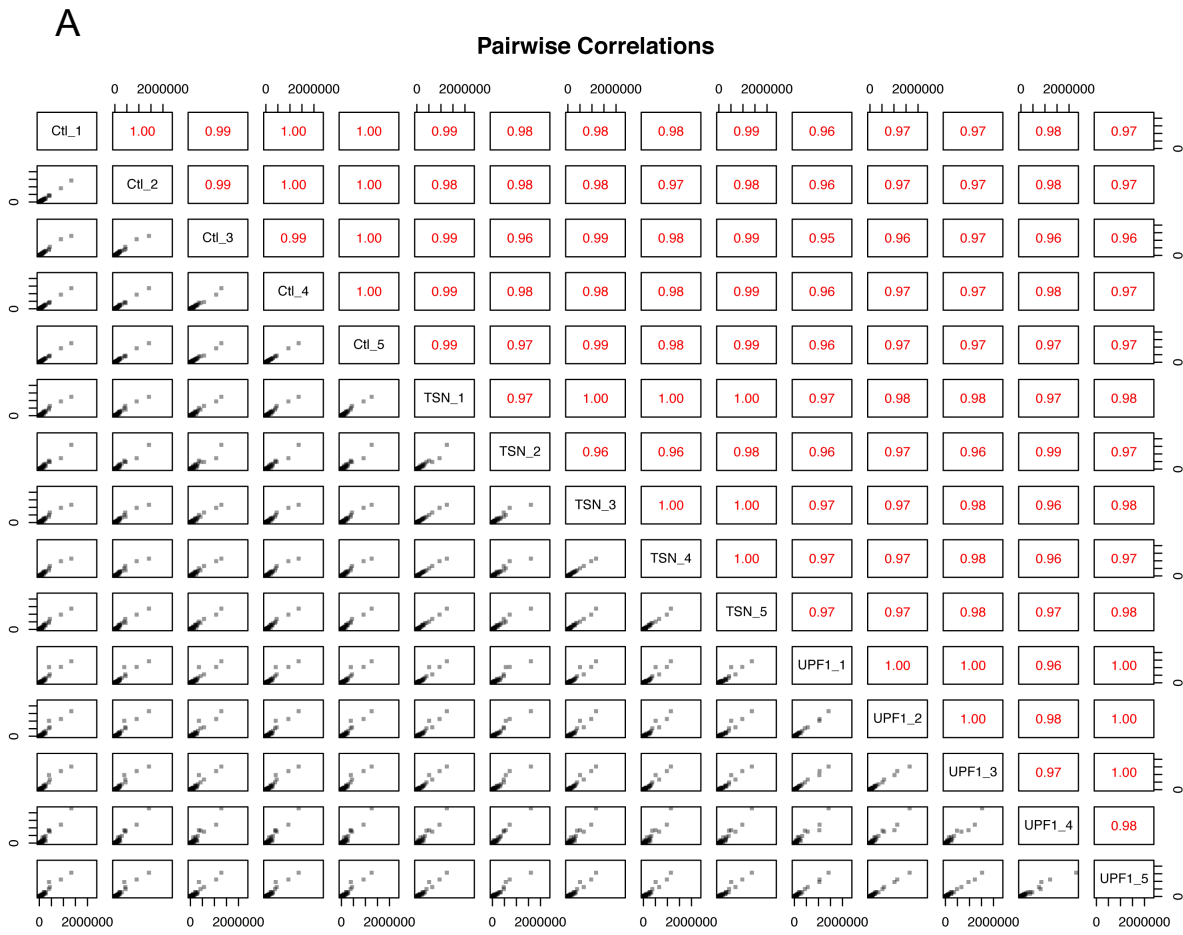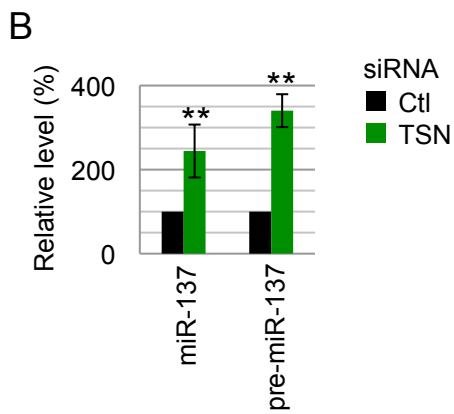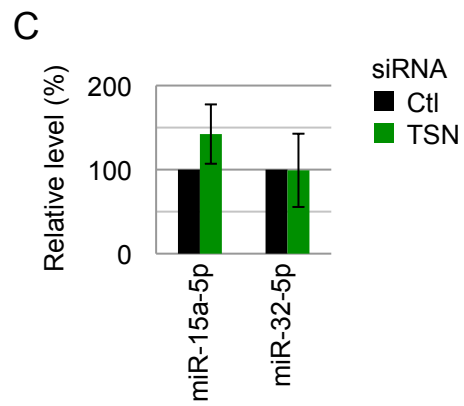

Supplement: supp_gad.303537.117_Supplemental_FigS3.pdf [file supp_gad.303537.117_Supplemental_FigS3.pdf]

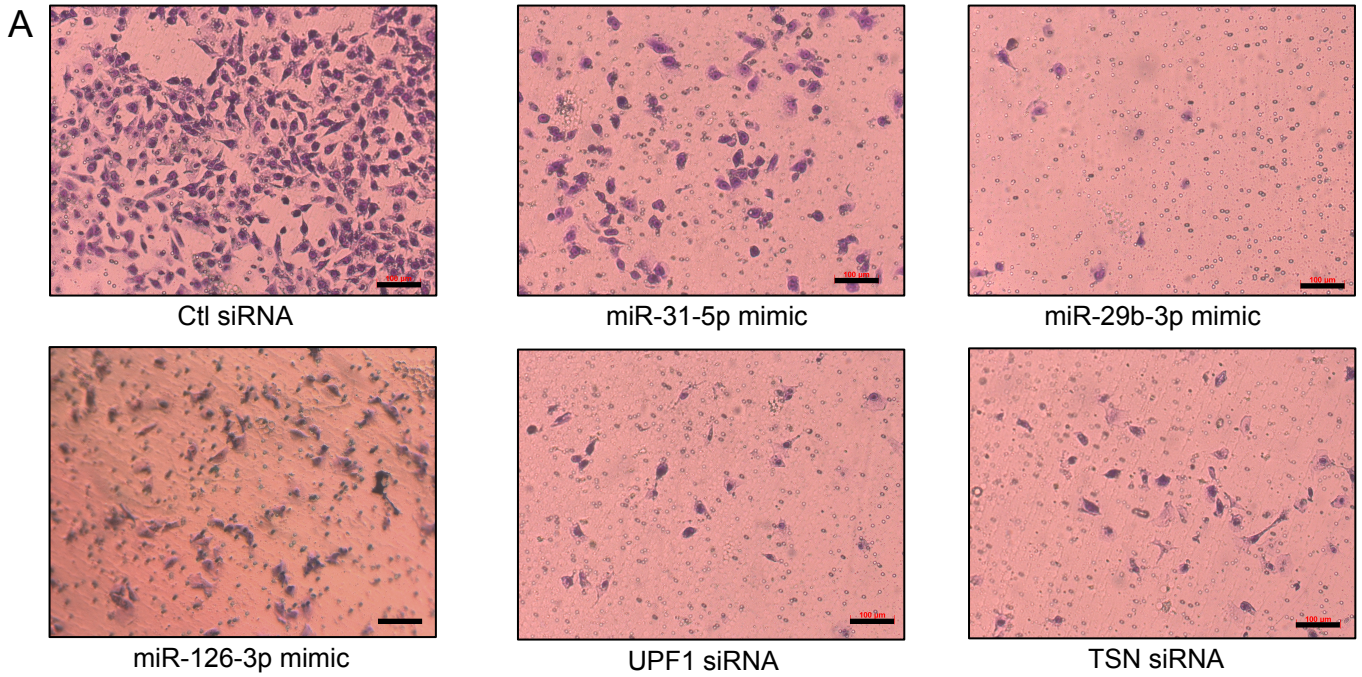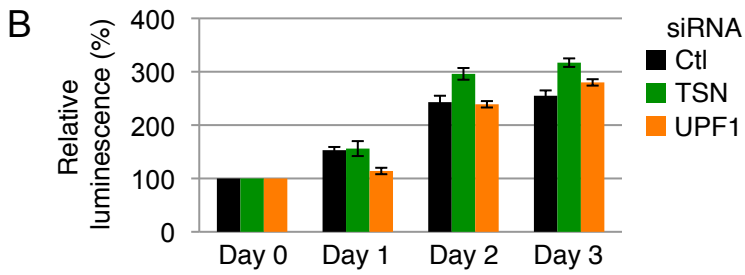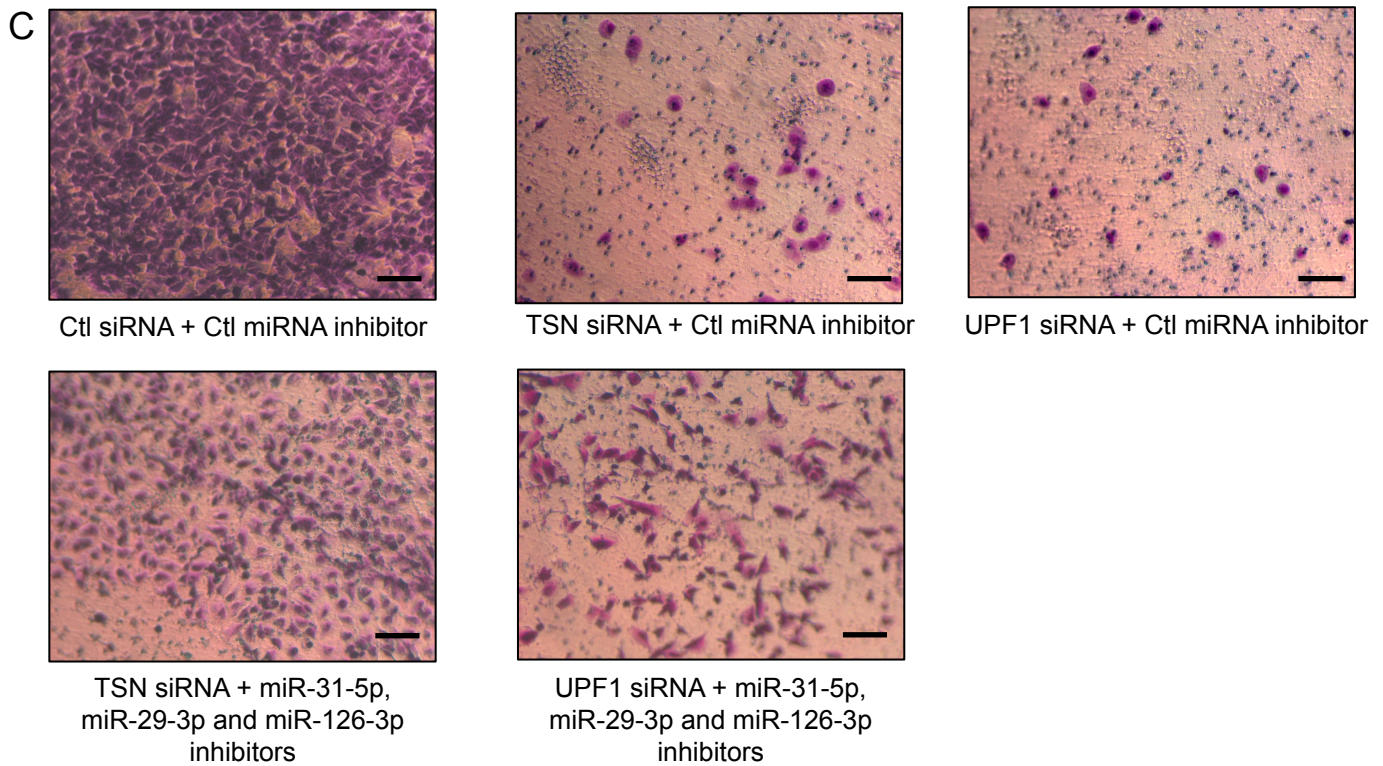

Supplement: supp_gad.303537.117_Supplemental_FigS4.pdf [file supp_gad.303537.117_Supplemental_FigS4.pdf]
